1 **Title. Exosome-transmitted miR-769-5p confers cisplatin resistance**  
2 **and tumorigenesis in gastric cancer by targeting CASP9 and**  
3 **promoting the ubiquitination degradation of p53**

4 **Authors**

5 Xinming Jing<sup>1\*</sup>, Mengyan Xie<sup>1\*</sup>, Kun Ding<sup>1\*</sup>, Tingting Xu<sup>1</sup>, Yuan Fang<sup>1</sup>, Pei Ma<sup>#1</sup>,  
6 Yongqian Shu<sup>#1,2,3</sup>

7 <sup>1</sup> Department of Oncology, The First Affiliated Hospital of Nanjing Medical  
8 University, China;

9 <sup>2</sup> Jiangsu Key Lab of Cancer Biomarkers, Prevention and Treatment, Collaborative  
10 Innovation Center for Cancer Personalized Medicine, Nanjing Medical University,  
11 Nanjing, China.

12 Xinming Jing, Mengyan Xie, and Kun Ding contributed equally to this work.

13 Corresponding author: Yongqian Shu (email: [shuyongqian2018@163.com](mailto:shuyongqian2018@163.com)); Pei Ma  
14 (email: [mapei@njmu.edu.cn](mailto:mapei@njmu.edu.cn))

15 **Abstract**

16 Cisplatin resistance is the main cause of poor clinical prognosis in patients with  
17 gastric cancer (GC). Yet, the exact mechanism of cisplatin resistance remains unclear.  
18 Recent studies have suggested that exocrine miRNAs found in the tumor  
19 microenvironment participates in tumor metastasis and drug resistance. In this study,

20 we discovered that cisplatin-resistant GC cells communicate with the tumor  
21 microenvironment by secreting microvesicles. The biologically active miR-769-5p  
22 can be integrated into exosomes and delivered to sensitive cells, thereby spreading  
23 cisplatin resistance. Mi769-5p was upregulated in GC tissues and enriched in the  
24 serum exosomes of cisplatin-resistant patients. Mechanistically, miR-769-5p  
25 promotes cisplatin resistance by targeting CASP9 so as to inhibit the downstream  
26 caspase pathway and promote the degradation of the apoptosis-related protein p53  
27 through the ubiquitin-proteasome pathway. Targeting miR-769 with its antagonist to  
28 treat cisplatin-resistant GC cells can restore the cisplatin response, confirming that  
29 exosomal miR-769-5p can be a key regulator of cisplatin resistance in GC. Therefore,  
30 exosomal miR-769-5p derived from drug-resistant cells can be used as a potential  
31 therapeutic predictor of anti-tumor chemotherapy to enhance the effect of anti-cancer  
32 chemotherapy, which provides a new treatment option for GC.

### 33 **Introduction**

34 Gastric cancer (GC) is the leading cause of cancer-related death worldwide [1].  
35 Cisplatin has been widely used for patients with advanced metastatic gastric cancer  
36 who are not eligible for surgery [2]. However, not all patients respond to cisplatin,  
37 which in turn leads to a poor prognosis [3]. Tumor resistance is a complex dynamic  
38 process of mutual influence between individuals and tumors. At the micro-level, it is  
39 the result of the mutual adaptation of the tumor microenvironment and tumor cells  
40 after chemotherapy [4]. The adaptive changes of tumor cells occur in an orderly

41 manner under the control of intricate signal networks and key molecules, in which the  
42 interaction of heredity, epigenetics, and post-translational protein modification has an  
43 important role.

44 MicroRNA (miRNA) is a non-coding RNA with a length of 18-22 nt, which  
45 regulates protein expression levels by blocking mRNA translation or inducing mRNA  
46 degradation [5]. It can modify the expression of target genes and regulate signal  
47 transduction and biological processes [6]. Changes in the expression of certain  
48 miRNAs in most tumors have been associated with tumor cell proliferation,  
49 angiogenesis, and drug resistance [7, 8].

50 The apoptotic signaling molecule CASP9 is one of the caspases, a family of  
51 proteins that regulates cell death [9, 10]. Anti-apoptosis is an important feature of  
52 malignant cells, which has been clearly related to tumor development and cancer  
53 resistance to treatment [11]. Targeting anti-apoptosis is considered to be a valuable  
54 strategy to improve susceptibility to apoptosis and the response to chemotherapy  
55 [12-14].

56 Another important molecule involved in apoptosis is p53, which can prevent  
57 abnormal cell proliferation and canceration and regulation of drug resistance [15, 16].  
58 Evidence shows that up to 80% of cellular proteins are degraded by the  
59 ubiquitin-proteasome system (UPS), including p53. UPS is a specialized proteolytic  
60 system that controls protein degradation and has an important role in cellular protein  
61 homeostasis [17-21].

62 In this study, we hypothesized that CASP9 and p53 might be a potential target  
63 gene of miR-769-5p involved in miR-769-5p's inhibition of gastric cancer cell  
64 apoptosis and might induce cisplatin resistance.

## 65 **Results**

### 66 **miR-769-5p is enriched in BGC823/DDP cell-derived exosomes**

67 To isolate exosomes from BGC823 and BGC823/DDP cells, we purified the  
68 conditioned medium by using differential centrifugations. Under the transmission  
69 electron microscope, nanovesicles were seen as a round shape with bilayered  
70 membranes, and the diameter distribution of these nanovesicles ranged from 40nm to  
71 150 nm for cryopreserved spheres (**Figure 1A**). NanoSight particle tracking analysis  
72 (NTA) of the size distributions and a number of exosomes revealed that the size of  
73 main vesicles secreted from BGC823 and BGC823/DDP cells was 82 nm and 89 nm,  
74 with concentrations of 1.13E+10 particles/ml and 7.29E+9 particles/ml, respectively  
75 (**Figure 1B**). By immunoblotting of lysates from purified nanovesicles and flow  
76 cytometry (FCM), the known exosomal markers TSG101, CD9, CD81 and CD63 were  
77 detected (**Figure 1C and 1D**). These results demonstrated that these nanovesicles  
78 isolated from BGC823 and BGC823/DDP express typical characteristics of exosomes.

79 Next, we compared the differences in miRNAs expressed in two cell-derived  
80 exosome populations by using sequencing analysis (**Figure 1E and F**). The level of  
81 miR-769-5p expressed in BGC823/DDP secreted exosomes (BD Exo) was 4.77 times  
82 that in BGC secreted exosomes (BC Exo). The expression of miR-769-5p in BD Exo

83 was  $8.778\pm 0.6923$ -fold greater than in BC Exo (**Figure 1G**). Moreover, using a  
84 TCGA database, we found that miR-769-5p has a promoting role in tumor (**Figure**  
85 **1H**).

86 To detect the miR-769-5p expression levels in 79 pairs of clinical samples, we  
87 used the technique of RNA in situ hybridization (ISH). Our results revealed that  
88 miR-769-5p had markedly higher expression in tumor tissues compared with  
89 paracancerous tissues (**Figure 1I** and **1J**). The results indicated that the abundance of  
90 miR-769-5p in GC tissues was much higher than that in matched normal tissues, and  
91 the expression of miR-769-5p was correlated with advanced TNM stage, vascular  
92 invasion and poor prognosis. Additionally, we investigated the expression level of  
93 miR-769-5p in human GC serum samples. miR-769-5p expression level was  
94 significantly increased in exosomes of DDP-resistant patients' serum (n=19, as  
95 compared to respective parental DDP-sensitive patients' serum (n=41) (**Figure 1K**).  
96 These findings suggested that miR-769-5p may be involved in DDP sensitivity.

### 97 **miR-769-5p is required for GC cisplatin-resistance**

98 Growing evidence indicates that exosomes released by cancer cells are enriched in  
99 miRNAs. Exosomal miRNAs can mediate phenotypical changes in the tumor  
100 microenvironment (TME) to promote tumor growth and therapy resistance. In this  
101 study, we hypothesized that miR-769-5p from BD Exo might participate in this  
102 process. We evaluated the effect of DDP on BGC823 cells in the presence of BD Exo  
103 and found that BD Exo significantly decreased the sensitivity of BGC823 cells to

104 cisplatin by CCK8 (**Figure 2C**). At a cisplatin concentration of 0.8 ug/ml, the survival  
105 of BGC823 cells increased after adding BD Exo compared with control. The  
106 half-maximal inhibitory concentration (IC50) of cisplatin was also increased.  
107 Additionally, the rates of BGC823 cells' apoptosis were reduced after being  
108 co-cultured with BD Exo for 24h (**Figure 2A** and **2B**). This data suggests that  
109 exosomes expression in resistant cells reduces IC50 and increases cell apoptosis of  
110 sensitive cells following cisplatin treatment.

111 A Transwell assay was used to examine whether the delivery of miR-769-5p  
112 occurs via exosomes. Briefly, we plated BGC823/DDP cells transfected with the  
113 Cy3-miR-769-5p mimics in the upper chamber and BGC823 cells in the lower  
114 chamber. The co-culture system was separated by 0.4 um pores, just allowing the  
115 transmission of micro particles such as exosomes but inhibiting direct contact  
116 between cells. After 24h, we found strong red fluorescence in BGC823 cells (**Figure**  
117 **2D**). This phenomenon proved that miR-769-5p might be directly transferred from  
118 donor cells to recipient cells through exosomes. Furthermore, to visualize exosome  
119 transfer, we first incubated BGC823 cells and BD Exo in the presence of  
120 PKH26-labeled for 24 hours and evaluated the BD Exo uptake levels by measuring  
121 the red PKH26 signal in the BGC823 cell line. The confocal immunofluorescence  
122 microscopy detected a robust exosome signal in the cytoplasm of BGC823 cells after  
123 incubation of labeled BD Exo (**Figure 2E**), thus suggesting that BD Exo was  
124 successfully taken up BGC823 cells. **Figure 2J** shows that the co-incubation with BD  
125 Exo increased the expression of miR-769-5p. Importantly, intratumor injection of BD

126 Exo promoted the growth and induced the cisplatin resistance of GC cells compared  
127 to the same group injected with PBS (**Figure 5D-5G**). Taken together, we have  
128 reasons to believe that miR-769-5p might be transferred via exosomes from resistant  
129 GC cells to the neighboring sensitive GC cells, thereby spreading cisplatin resistance.

### 130 **Exosome-mediated transfer of miR-769-5p targets CASP9 directly**

131 To further explore the mechanism through which BD Exo and miR-769-5p induced  
132 cisplatin resistance, we investigated the target gene involved in mediating the effect of  
133 miR-769-5p on modulating apoptosis by miRanda, TargetScan, MiRWalk, and  
134 miRTarBase. We found that CASP9 was a target of miR769-5p in 3'-UTR area.  
135 Luciferase reporter assay further showed a significant reduction in luciferase activity  
136 when miR-769-5p was expressed in HEK293T cells as it did not affect the luciferase  
137 activity when the binding site was mutated (**Figure 2F** and **2I**). Furthermore,  
138 qRT-PCR and Western blotting showed that overexpression of miR-769-5p inhibited  
139 the expression of CASP9 in BGC823 cells, whereas inhibition of miR-769-5p  
140 reversed this process (**Figure 2G** and **2H**), thus suggesting that miR-769-5p can  
141 negatively regulate CASP9 at both the transcript and protein levels.

142 Next, we infected BGC823 cells with lentiviral vectors to construct cell lines  
143 stably expressing miR-769-5p inhibitor (BGC anti-769), negative control miRNA  
144 inhibitor (BGC anti-NC), or CASP9 overexpression (BGC CASP9). Then, we  
145 cocultured these cells directly with BD Exo (BGC anti-769 + BD Exo, BGC anti-NC  
146 + BD Exo and BGC CASP9 + BD Exo), BGC anti-NC incubated with the same

147 amount of PBS (BGC anti-NC+ PBS) were used as a negative control. **Figure 2J**  
148 (**SFig 1F**) shows that the co-incubation with BD Exo increased the expression of  
149 miR-769-5p in BGC anti-NC but had no effect on the expression of BGC anti-NC in  
150 BGC anti-769 cells. Compared with the control group BGC anti-NC+ PBS, the  
151 expression of CASP9 in BGC anti-NC + BD Exo was reduced. Nevertheless, when  
152 miR-769-5p was inhibited in BGC823, the impact above of reduction in CASP9  
153 induced by BD Exo was offset (**Figure 2K and 2L, SFig 1E and 1G** ). These results  
154 suggested that BD Exo can induce the upregulation of miR-769-5p and  
155 downregulation of CASP9 in recipient cells.

156 Transwell assay was used to further explore whether the delivery of miR-769-5p  
157 to recipient cells is dependent on exosomes. We plated BGC823/DDP cells with  
158 GW4869 in the upper chamber to prevent exocytosis, while BGC823 cells were  
159 seeded in the lower chamber. After 24 hours, we collected BGC823 cells and found  
160 that the expression of miR-769-5p in the cells (BGC+BD Exo GW4869) was  
161 significantly reduced compared with the control group cells treated with DMSO  
162 (BGC+BD Exo DMSO)(**Figure 2M, SFig 1I**). The CASP9 mRNA and protein  
163 expression were significantly increased (**Figure 2N and 2O, SFig 1H and 1J**). These  
164 results indicated that the delivery of miR-769-5p was dependent on exosomes.

165 In another experiment, we plated BGC823/DDP cells transfected with  
166 miR-769-5p inhibitor (BD 769 inhibitor) in the upper chamber and BGC823 cells in  
167 the lower one. We found that the co-cultured recipient cells CASP9 mRNA (**Figure**



168 **2O, SFig 1J)** and protein (**Figure 2P, SFig 1K)** levels were higher than the negative  
169 control. In addition, when BD cells in the upper chamber were co-transfected with  
170 anti-miR-769-5p and CASP9-siRNA (BD anti-769+siCASP9), and exosomes released  
171 from BD cells had no statistically significant effect on the mRNA and protein levels  
172 of CASP9 in the recipient cells. These results further confirmed that miR-769-5p was  
173 present in exosomes and that CASP9 was down-regulated by miR-769-5p.

174 **Exosome-mediated transfer of miR-769-5p confers cisplatin resistance through**  
175 **downregulating CASP9 and subsequent evasion of apoptosis**

176 Next, we determined that exosomal miR-769-5p confers cisplatin resistance in  
177 BGC823 cells by targeting CASP9. As shown in (**Figure 3A, SFig 2A**), BD Exo  
178 significantly enhanced the apoptosis of BC anti-NC cells by  $4.483 \pm 0.3153\%$  induced  
179 by cisplatin (0.4 ug/ml, 24h), while no statistically significant difference was observed  
180 in BGC823 cells with miR-769-5p knockdown or CASP9 overexpression. Therefore,  
181 miR-769-5p knockdown or CASP9 overexpression could reverse the effect of BD  
182 Exo on the cisplatin resistance of BGC823 cells. Compared with BGC823/DDP cells  
183 treated with DMSO, after co-cultivation with BGC823/DDP cells treated with  
184 GW4869 (10  $\mu$ M), the level of apoptosis of BGC823 cells induced by cisplatin was  
185 reduced by  $4.470 \pm 0.9988\%$  (**Figure 3B, SFig 2B**). In addition, when they were  
186 co-cultured with miR-769-5p knockdown BGC823/DDP cells, the cisplatin resistance  
187 of BGC823 cells was reduced (**Figure 3C, SFig 2C**).

188  $\gamma$ -H2AX is a sign of DNA double-strand breaks. After 24 h cisplatin treatment  
189 (0.8 ug/ml, 24h), the level of  $\gamma$ -H2AX nuclear foci in the control group remained high,  
190 but the nuclear foci in the BD Exo co-culture group significantly decreased by 36.77  
191  $\pm$  3.079% (**Figure 3D, SFig 3A**). However, there was no statistically significant  
192 difference observed in BGC823 cells with miR-769-5p knockdown or CASP9  
193 overexpression.  $\gamma$ -H2AX expression levels in nuclear foci indicated that cisplatin  
194 induces more resistant cell lines after co-culturing with BD Exo. Similarly, after  
195 co-culturing with BGC823/DDP cells treated with GW4869 (10  $\mu$ M), the level of  
196  $\gamma$ -H2AX expression in nuclear foci of BGC823 cells induced by cisplatin was reduced  
197 by 37.47  $\pm$  5.590% compared with BGC823/DDP cells treated with DMSO (**Figure**  
198 **3E, SFig 3B**).

199 We then used a Transwell assay and co-cultured BGC823/DDP cells transfected  
200 with miR-769-5p inhibitor (BD anti-769) with BGC823 cells seeded in the lower  
201 chamber and found that  $\gamma$ -H2AX expression levels in nuclear foci of co-cultured  
202 recipient cells were higher than the negative control (**Figure 3F, SFig 3C**).  
203 Co-incubation of BGC823/DDP cells co-transfected with miR-769-5p inhibitor and  
204 CASP9-siRNA had no profound synergistic effect on  $\gamma$ -H2AX expression in BGC823  
205 cells.

206 To further investigate the role of exosomal miR-769-5p cisplatin-induced  
207 apoptosis, we performed TUNEL analysis and found that it was consistent with the  
208 verification of flow cytometry assays (**Figure 3G, Figure 4A and B, SFig 3D-3F**).

209 The results showed that the exosomal miR-769-5p from cisplatin-resistant cells could  
210 accelerate cell apoptosis of cisplatin-sensitive cells. Western blots assay demonstrated  
211 that the protein levels of caspase-9 and cleaved caspase-3 in BGC anti-NC + BD Exo  
212 cells were reduced, yet there were no obvious differences in the BGC anti-769 + BD  
213 Exo and BGC CASP9 + BD Exo cells (**Figure 5A, SFig 4A**). Compared with  
214 BGC+BD Exo DMSO or BGC+BD anti-NC Exo cells, the caspase-9 and cleaved  
215 caspase-3 protein levels were increased in BGC823 cells co-cultured with  
216 BGC823/DDP cells treated with GW4869 or transfected with miR-769-5p inhibitor  
217 (**Figure 5B and 5C, SFig 4B and 4C**). Thus, these data suggested that the knockdown  
218 miR-769-5p could reverse the chemoresistance of gastric cancer cells to cisplatin.

219 **Exosomal miR-769-5p promotes recipient cells proliferation and migration by**  
220 **downregulating CASP9**

221 Next, we investigated whether exosomal miR-769-5p affects the biological processes  
222 of GC cells. BGC anti-NC cells treated with BD EXO showed increased colony  
223 formation, migration capacity compared to BGC anti-NC cells treated with PBS  
224 (**Figure 4C and 4F, SFig 2D and 2G**). Nevertheless, this alteration was reversed  
225 when BGC anti-769 or BGC CASP9 cells were co-cultured with BD Exo. In contrast,  
226 when BGC823 cells were co-cultured with BGC823/DDP treated with GW4869 or  
227 miR-769-5p knockdown, the colony formation, migration capacity of BGC823 cells  
228 decreased compared to those of the corresponding negative controls (**Figure 4D and**  
229 **4E, 4G and 4H, SFig 2E and 2F, SFig 2H and 2I**). Our findings suggested that

230 exosomal miR-769-5p enhanced GC cell proliferation and migration by  
231 downregulating CASP9.

232 To sum up, the miR-769-5p was markedly upregulated in BGC823 cells treated  
233 with BD Exo, which suggested its potential role in cisplatin resistance and indicated  
234 the possibility of achieving the cisplatin resistance through the exosomal transfer of  
235 miR-769-5p by inhibiting CASP9 in GC cells.

### 236 **miR-769-5p promotes ubiquitin-mediated p53 protein degradation in GC cells**

237 It has been reported that the transcription factor P53 is essential in the complex  
238 molecular network regulating apoptosis, and the activation of tumor suppressor P53 is  
239 crucial for preventing abnormal cell proliferation and carcinogenesis. Many studies  
240 have shown that P53 is involved in regulating the generation of drug resistance. The  
241 main targets of P53 include P21, PUMA, BAX, and BID [22-24]. To further  
242 determine whether miR-769-5p is involved in GC cisplatin resistance and its  
243 molecular mechanism, we found that the targets of differentially expressed miRNAs  
244 were enriched in the p53 pathway based on the KEGG enrichment analysis of  
245 differentially expressed miRNAs in exosomes (**Figure 6A**). Therefore, we hypothesized  
246 that miR-769-5p might affect the p53 pathway. To evaluate whether miR-769-5p is  
247 involved in p53-mediated apoptosis of gastric cancer cells, miR-769-5p expression in  
248 BGC823 and SGC7901 cells was overexpressed and knocked down using  
249 miR-769-5p mimics and inhibitors, respectively, after which the expression of p53  
250 mRNA and protein were analyzed (**Figure 6B and 6C**). Western blotting showed that

251 miR-769-5p silencing significantly enhanced the expression of p53 in GC cells, while  
252 overexpression of miR-769-5p had the opposite effects (**Figure 6C**). It indicated that  
253 miR-769-5p negatively regulates p53 protein expression and p53-mediated apoptosis  
254 in gastric cancer cells. However, qRT-PCR showed that the transcription level of p53  
255 was not affected by miR-769-5p in gastric cancer cells, indicating that the p53 protein  
256 in gastric cancer cells may be degraded by ubiquitination (**Figure 6B**). As a result, we  
257 transfected miR-769-5p inhibitors into GC cells, and twenty-four hours later, the cells  
258 were treated with 20 µg/ml cycloheximide (CHX) changes with treatment time (0h,  
259 1h, 4h). The cell lysates were then collected within a specified time period and  
260 analyzed by Western blot. Higher expression of p53 protein was detected in the cells  
261 treated with CHX compared with negative controls (**Figure 6E, SFig 4D**). We also  
262 treated the cells with MG-132, a specific inhibitor of a ubiquitin-binding protein, and  
263 found that higher expression of p53 protein was detected in the cells treated with  
264 MG-132 (10µm) for 6h (**Figure 6F, SFig 4E**), indicating that p53 protein degradation  
265 depends on the ubiquitination.

266       According to ubibrowser, we characterized the p53-specific E3 ubiquitin ligases  
267 to determine the mechanism of miR-769-5p mediated p53 ubiquitination in GC cells.  
268 We selected the top five p53 E3 ubiquitin ligases to be silenced by sequence-specific  
269 small interfering RNA (siRNA) in HEK-293T. Detection of p53 protein showed that  
270 when NEDD4L expression is knocked down by sequence-specific siRNA, p53 levels  
271 increase (**Figure 6G**). NEDD4L is the key E3 ubiquitin ligase for p53 ubiquitination

272 in GC cells [25-27]. However, the negative control of NEDD4L-siRNA did not affect  
273 p53 expression.

274 Co-immunoprecipitation (Co-IP) and Western blotting were used to detect the  
275 interaction between NEDD4L and p53 in gastric cancer cells (**Figure 6H** and **6J**,  
276 **SFig 4F** and **SFig 4H**). The NEDD4L overexpression plasmid and His-Ub plasmid  
277 were co-transfected in BGC, and the ubiquitination level of p53 was detected by  
278 immunoprecipitation and Western blotting. NEDD4L overexpression promoted the  
279 ubiquitination of p53 (**Figure 6I**, **SFig 4G**), indicating that NEDD4L mediates the  
280 ubiquitination modification. In order to further evaluate the effect of miR-769-5p on  
281 the expression of NEDD4L, we inhibited and overexpressed miR-769-5p in gastric  
282 cancer cell lines to detect the expression of NEDD4L and p53 protein levels (**Figure**  
283 **6K**, **SFig 4I**). Compared with the negative control group, knockdown of miR-769-5p  
284 significantly reduced the expression of NEDD4L and increased the expression level  
285 of p53, while overexpression of miR-769-5p showed the opposite result. Western blot  
286 also demonstrated that NEDD4L silencing caused p53 protein accumulation in  
287 miR-769-5p-silenced cancerous cells. This indicated that the inhibition of miR-769-5p  
288 could inhibit the expression of E3 ubiquitinated ligase NEDD4L, increasing the level  
289 of substrate p53. These data suggested that miR-769-5p could promote NEDD4L's  
290 expression, leading to its participation in the p53 ubiquitination degradation process.

291 **E3 ubiquitination ligase RNF20 participates in miR-769-5p mediated p53 protein**  
292 **ubiquitination in GC cells**

293 According to the miRNAs target gene prediction, we found that NEDD4L was not the  
294 target gene of miR-769-5p. So, it was unclear how miR-769-5p regulates and inhibits  
295 the expression of NEDD4L. Based on the miRNA target gene prediction website and  
296 UbiBrowser website, we found that E3 ubiquitin ligase RNF20 might be the target  
297 gene of miR-769-5p (**Figure 6L, 6M and 6N**). To characterize the interaction  
298 between miR-769-5p and RNF20, a dual-luciferase reporter assay was conducted in  
299 HEK293T cells. The results revealed that miR-769-5p significantly decreased the  
300 activity of the reporter luciferase that was fused with the wild-type RNF20  
301 3-untranslated region (UTR) compared with the controls (**Figure 6O**). This  
302 observation suggested a direct interaction between miR-769-5p and RNF20 mRNA.  
303 Reports showed that a low RNF20 level was correlated with shortened overall  
304 survival and disease-free survival, indicating poor prognosis in cancers [28, 29].

305 Additionally, we discovered that RNF20 and NEDD4L interacted in GC cells.  
306 We transfected silenced and overexpressed RNF144B and negative control plasmids  
307 in BGC823 and tested the effect of RNF20 on apoptosis by TUNEL experiment  
308 (**Figure 7A and 7D, SFig 5A and 5C**) and immunofluorescence detection of  $\gamma$ -H2AX  
309 expression level (**Figure 7B and 7E, SFig 5B and 5D**). TUNEL results showed that  
310 compared with the negative control group, overexpression of RNF20 significantly  
311 promoted the apoptosis of gastric cancer cells while inhibition of RNF20 inhibited  
312 cell apoptosis. The results of immunofluorescence detection of  $\gamma$ -H2AX expression  
313 level were consistent with the results of the TUNEL experiment. Moreover, Western  
314 blot showed that the overexpression of RNF144B resulted in increased cleaved

315 caspase 3 and related to activated apoptosis (**Figure 7C** and **7F**, **SFig 6A** and **6B**).  
316 The activation of apoptosis by RNF20 overexpression was further confirmed by flow  
317 cytometry assay (**Figure 7H**). The above results indicate that RNF20, as a target gene  
318 of miR-769-5p, can participate in cell apoptosis.

319 RNF20 can be used as a target gene of miR-769-5p to participate in cell  
320 apoptosis. Thus, we further determined how RNF20 conveys apoptotic signals in  
321 p53-mediated cell apoptosis. The gene expression of RNF20 was silenced or  
322 overexpressed in GC cells, followed by RNF20 and p53 protein detection. RNF20  
323 overexpression markedly suppressed NEDD4L expression and simultaneously  
324 induced p53 expression in gastric cancer cells (**Figure 7G**, **SFig 6C**), while silencing  
325 the RNF20 gene had the opposite effect on NEDD4L and p53 expression in gastric  
326 cancer cells. Furthermore, we overexpressed the RNF20 plasmid in GC cells and  
327 performed Co-IP with anti-RNF20 to identify proteins that interacted with RNF20.  
328 Our results indicated that RNF20 was bound to NEDD4L (**Figure 7I**, **SFig 6D**), thus  
329 suggesting that RNF20 participates in p53-mediated gastric cancer cell apoptosis by  
330 regulating NEDD4L expression.

331 To clarify whether NEDD4L could be ubiquitinated by RNF20 (**Figure 7Q** and  
332 **7R**, **SFig 6E** and **6F**), the His-Ub and RNF20 were co-expressed in GC cells, and  
333 anti-NEDD4L were used to pull down modified proteins. The presence of  
334 polyubiquitinated NEDD4L was observed as a smeared band because of the  
335 heterogeneous modification of this protein. At the same time, we stained the



336 polyubiquitinated NEDD4L in the flag-Ub immunoprecipitants to confirm that the  
337 ubiquitination modification of NEDD4L was mediated by RNF20 and found that  
338 RNF20 overexpression further enhanced the polyubiquitinated NEDD4L compared  
339 with the control. These findings revealed that RNF20 was an E3 ligase for NEDD4L  
340 and that RNF20 polyubiquitinated NEDD4L for degradation.

341 **Exosomal miR-769-5p induces cisplatin resistance and promotes the**  
342 **tumorigenesis of GC *in vivo***

343 Given the observed effects of exosomal miR-769-5p on GC cells *in vitro*, we  
344 subsequently confirmed the aforementioned results *in vivo*. To determine whether  
345 miR-769-5p sensitizes GC cells to chemotherapeutic agents *in vivo*, anti-miR-769-5p  
346 transfected BGC823/DDP cells were subcutaneously implanted into nude mice and  
347 then treated with cisplatin (DDP, 4mg/kg). Our data indicated that miR-769-5p  
348 knockdown significantly decreased cisplatin resistance in BGC823/DDP xenografts  
349 (**Figure 8A-8E**). Levels of exosomal miR-769-5p were approximate two folds lower  
350 in the serum than that of the negative control group, and the expression levels of  
351 CASP9, p53, and cleaved caspase3 were decreased when the level of miR-769-5p  
352 increased in the subcutaneous tumor tissues of mice (**Figure 8N**). These data support  
353 our findings that knockdown miR-769-5p ameliorates cisplatin-resistant GC *in vitro*  
354 and *in vivo*.

355 In addition, we subcutaneously injected the stably transfected BGC 823 NC and  
356 BGC823 769 cells into nude mice and found that the tumors of BGC823 769 grew

357 faster than those of BGC823 NC. After cisplatin treatment, the tumor volume of the  
358 BGC823 769 group was significantly higher compared to BGC 823 NC group  
359 (Figure 8F-8J). These results indicated that miR-769-5p could promote growth and  
360 induce the cisplatin resistance of BGC823 cells *in vivo*. Collectively, miR-769-5p  
361 expression was indispensable for cisplatin resistance in GC cells.

## 362 Discussion

363 Chemotherapy is the most important treatment for patients who cannot  
364 undergo surgery or those with advanced metastatic gastric cancer [30]. Yet,  
365 multidrug resistance, which has been associated with a poor prognosis, remains a  
366 big challenge when treating cancer patients [31]. For example, cisplatin resistance  
367 presents a big obstacle in treating patients with advanced gastric cancer.

368 miRNAs can be encapsulated in exosomes to avoid degradation. Exosomal  
369 miRNA can be transported to recipient cells and change their phenotype through  
370 changes in gene expression [32-34]. For example, drug-resistant cancer cells may  
371 release exosomal miRNAs into the microenvironment, causing the recipient cells to  
372 develop drug resistance [35-37]. This ability of exosomes shed from tumor-resistant  
373 cells to transfer drug-resistant phenotypes to drug-sensitive cells is considered an  
374 important mechanism of drug resistance that is mainly spread mainly by drug efflux  
375 pump and miRNAs' transfer. Numerous studies have reported that exosomes have  
376 an important role in invasive tumor progress and chemotherapy resistance.

377 Our results showed that miR-769-5p in exosomes derived from

378 cisplatin-resistant cells could confer drug-resistant phenotypes on recipient cells  
379 and alter their gene expression and apoptosis. This is because when BGC823 cells  
380 treated with exosomes respond to cisplatin, the survival time increases. We also  
381 found that BD Exo inhibits the effect of cisplatin in BGC823 cells by transferring  
382 miR-769-5p. However, transfection of anti-miR-769 into BD cells partially blocked  
383 the effect of BD exo on cisplatin. **Figure 8k** summarizes the mechanism through  
384 which drug-resistant cells transfer mir-769-5p-loaded exosomes to sensitive cells  
385 and modulated cisplatin resistance. Mechanistically, exosomal miR-769-5p inhibits  
386 cell apoptosis by targeting the downstream caspase pathway of CASP9 inactivation  
387 and enhancing the drug resistance of recipient cells to cisplatin (**Fig. 8K**).

388       The activation of the tumor suppressor p53 is essential to prevent abnormal cell  
389 proliferation and canceration. Many studies have shown that p53 is involved in the  
390 regulation of drug resistance. For example, phosphorylation of p53 serine 15 (Ser15)  
391 and serine 20 (Ser20) has been identified as essential in cisplatin resistance [38, 39].  
392 As a key cellular protein regulator, ubiquitination can cause protein degradation. In  
393 the process of protein ubiquitination, E3 ubiquitin ligase determines substrate  
394 specificity and substrate selection. In addition, the mechanism of ubiquitin-mediated  
395 p53 protein degradation has been extensively studied [40, 41]. For example,  
396 mdm2-dependent p53 polyubiquitination and degradation can regulate cell  
397 proliferation, DNA damage-induced apoptosis, and tumorigenesis by inhibiting p53  
398 [42, 43]. However, the role of miRNA in the regulation of p53 protein ubiquitination  
399 remains unclear.

400 Looking for the target genes of miR-769-5p, we found that miR-769-5p  
401 promotes the degradation of p53 and inhibits apoptosis through the  
402 ubiquitin-proteasome pathway, thus promoting the resistance of gastric cancer cells to  
403 cisplatin. Our study revealed a new mechanism of p53 protein ubiquitination mediated  
404 by miR-769-5p in cisplatin resistance. As an important apoptosis-related protein,  
405 miR-769-5p participates in the apoptosis of gastric cancer cells through the  
406 RNF20-NEDD4L-p53 pathway in the process of induced apoptosis, and miR-769-5p  
407 can directly inhibit the expression of RNF20. Previous studies have shown that  
408 HBRE1 /RNF20 is the E3 ubiquitin ligase of histone H2B, and the deletion of  
409 RNF20 as a tumor suppressor can lead to the overall decrease of H2Bub level[44, 45].  
410 Our results showed that RNF20 had a critical role in p53 protein ubiquitination in  
411 gastric cancer cells, mediating the direct degradation of p53 protein by E3 ubiquitin  
412 ligase NEDD4L, thus revealing a novel miRNA-mediated p53 protein ubiquitination  
413 pathway (**Figure 8K**).

414 Cancer is a complex genetic disease. Chemotherapy and radiation therapy have  
415 always been the core treatment options for cancer. However, these treatments have  
416 adverse side effects. Due to malignant tumors being highly heterogeneous in their  
417 occurrence and development, this study proved that miR-769-5p, which is highly  
418 expressed in drug-resistant gastric cancer cells, can be transferred to recipient cells  
419 sensitive to cisplatin via exosomes. The specific induction of gastric cancer cell  
420 apoptosis and cisplatin resistance indicates that inhibiting miR-769-5p may represent  
421 a potential therapeutic intervention strategy for the treatment of refractory gastric

422 cancer.

## 423 **Materials and methods**

424 All the materials and methods, and abbreviations are included in **Supplementary**  
425 **Materials and Methods.**

## 426 **Supplementary Materials and Methods**

### 427 **Patient tissue and blood samples**

428 Samples for cancer patients, including tissue and plasma specimens, were collected  
429 from the First Affiliated Hospital of Nanjing Medical University. Blood samples  
430 (serum) from 19 cisplatin-resistant patients and 41 cisplatin-sensitive patients were  
431 collected and stored at  $-80^{\circ}\text{C}$ . Other samples of 150 cases (75 pairs of GC tumor and  
432 normal tissues) were embedded with 75 paraffin and analyzed by tissue microarray.  
433 Clinicopathological features, including age, sex, tumor site, tumor size, differentiation  
434 grade, Lauren classification, TNM stage (American Joint Committee on Cancer  
435 classification, AJCC), and lymphatic invasion, were also collected and analyzed  
436 (Table 1). This study was approved by the Ethics Committee of the First Affiliated  
437 Hospital of Nanjing Medical University. All patients signed an informed consent.

### 438 **Cell culture and treatment**

439 The HEK-293T cell line was purchased from Type Culture Collection of the Chinese  
440 Academy of Sciences (Shanghai, China). Gastric cancer BGC823, SGC7901 cell lines,

441 cisplatin-resistant BGC823/ DDP, and SGC7901/DDP cells were a kind gift from  
442 Professor Jianwei Zhou (School of Public Health, Nanjing Medical University). All  
443 cell lines were cultured in RPMI 1640 media (Gibco, Carlsbad, CA, USA) containing  
444 10% fetal bovine serum (FBS) (ScienCell, CA, USA) and supplemented with 100  
445  $\mu\text{g/ml}$  streptomycin, 100 U/ml penicillin in a humidified atmosphere containing 5%  
446  $\text{CO}_2$  at 37 °C. BGC823/ DDP and SGC7901/ DDP cells were cultured in a medium  
447 maintained with 0.5  $\mu\text{g/ml}$  cisplatin (First Affiliated Hospital of Nanjing Medical  
448 University). Before the experiments, cell were cultured in a drug-free medium for at  
449 least 7 days. Cycloheximide (CHX)(Sigma-Aldrich, MO, USA) and MG132 (Selleck  
450 Chemicals, USA) were used at the indicated concentrations.

#### 451 **Exosome isolation and characterization**

452 Cell culture supernatant was collected after being washed with PBS and incubated  
453 with freshly prepared complete medium containing exosome-free FBS for 48h.  
454 Exosomes were isolated from the conditioned medium by differential centrifugation.  
455 Conditioned medium was centrifuged at 300 g for 10 min and then at 2,000 g for 20  
456 min at 4 ° C. The supernatant was then passed through a 0.22-  $\mu\text{m}$  filter (Millipore,  
457 Burlington, MA, USA) to remove shedding vesicles and other vesicles larger in size.  
458 Finally, the supernatant was centrifuged at 110,000  $\times$  g for 70 min. Pelleted  
459 exosomes were resuspended in PBS and collected by ultracentrifugation again at  
460 100,000 g for 90 min (all steps were performed at 4 ° C). Exosomes were collected  
461 from the pellet and resuspended in 100  $\mu\text{L}$  of PBS and subjected to several

462 experiments. The fractionation and purification of exosomes from conditioned media  
463 (CMs) and blood serum were collected by ultracentrifugation (Beckman Coulter) and  
464 ExoQuick Exosome Precipitation Solution (SBI, CA, USA) respectively. Exosomes  
465 were then identified by Transmission Electron Microscope (TEM) (Philips TECNAI  
466 20, Netherland), and their particle morphology and size were analyzed. The  
467 concentration and number of exosomes were detected by nanoparticle tracking  
468 analysis (NTA). Exosome protein markers were identified by Western blot assay and  
469 flow cytometry analysis (FACS Calibur, BD Biosciences, USA) .

#### 470 **PKH26 Staining for Exosomes**

471 The isolated exosomes were labeled with PKH26 Red Fluorescent Cell Linker Kits  
472 (Sigma). Exosomes were first resuspended in 100  $\mu$ L Diluent C. A dye solution ( $4 \times$   
473  $10^{-6}$  M) was prepared by adding 0.4  $\mu$ L PKH26 ethanolic dye solution to 100  $\mu$ L  
474 Diluent C. The 100  $\mu$ L exosome suspension was then mixed with the 100  $\mu$ L dye  
475 solution by pipetting. After incubating the cell and dye suspension for 5 min with  
476 periodic mixing, the staining was stopped by adding 200  $\mu$ L serum and incubating for  
477 1 min. The stained exosomes were finally washed twice with  $1 \times$  PBS, and they were  
478 resuspended in a fresh sterile conical polypropylene tube.

#### 479 **Lentiviral, plasmid, and microRNA mimics/inhibitors package and cell** 480 **transfection**

481 The lentivirus encoding miR-769-5p overexpression or knockdown and negative

482 control (769, NC, anti-769, anti-NC) were designed and produced by GENECHM  
483 (Shanghai, China). The lentivirus were added to BGC823 BGC823/DDP, SGC7901  
484 and SGC7901/DDP cells respectively and stable cell lines were obtained by selection  
485 with puromycin (Sigma-Aldrich, MO, USA). The infection efficiency was confirmed  
486 by fluorescence microscopy and real-time quantitative RT-PCR (qRT-PCR).  
487 pcDNA3.1 vector containing CASP9-wt, CASP9-mut, RNF20-wt or RNF20-mut, and  
488 a control vector were purchased from GENECHM (Shanghai, China). miR-769-5p  
489 mimics, inhibitor and control, Cy3-miR-769-5p mimics and control were produced by  
490 GenePharma (Shanghai, China). Plasmids and miRNA mimics or inhibitors were  
491 transfected into cells with Lipofectamine 3000 (Invitrogen) according to the  
492 manufacturer's instructions. The siRNAs and controls were designed and synthesized  
493 by RiboBio (Guangzhou, China). The siRNAs were transfected into the cells by  
494 DharmaFECT4 (Dharmacon, IL, USA); all sequences are listed in **Additional file 2**  
495 **Table S1**.

#### 496 **RNA extraction and quantitative RT-PCR**

497 Total cellular and exosomal RNA was extracted from exosomes, co-cultured cells or  
498 GC cells, and frozen xenograft tumor tissues using TRIzol reagent (Invitrogen, CA,  
499 USA). Isolated RNA was used for the reverse transcription reaction with HiScript Q  
500 RT SuperMix for qPCR (Vazyme, Jiangsu, China). Quantitative RT-PCR was carried  
501 out with SYBR Green PCR Master Mix (Vazyme) using an ABI Prism 7900  
502 Sequence detection system (Applied Biosystems, Canada). The relative expression of



503 miR-769 was normalized to U6 levels, and CASP9, RNF20, p53 mRNA expression  
504 were normalized to GAPDH by qPCR using Power SYBR Green (Takara, Dalian,  
505 China). Data were calculated by the  $2^{-\Delta\Delta CT}$  method. The related primers are  
506 synthesized by Ribobio (Guangzhou, China) and listed in **Additional file 2: Table**  
507 **S2**.

### 508 **Dual-luciferase reporter assays**

509 293T cells ( $3 \times 10^4$  cells per well) were seeded onto 24-well plates 1 day before  
510 transfection and were co-transfected by Lipofectamine™ 3000 (Invitrogen, USA)  
511 with luciferase reporter (200 ng per well) using pmiR-REPORT™ luciferase vectors  
512 (pmirGLO) containing wild-type or mutant 3'-UTR of CASP9 and RNF20 and  
513 miR-769-5p mimics or miR-769-5p mimic-NC to examine the miRNA binding ability.  
514 The cells were washed and lysed with the passive lysis buffer from the  
515 Dual-Luciferase Reporter Assay System (Promega Corp). About 24 h later, a  
516 Dual-Luciferase Reporter Assay kit (Promega, USA) was used to measure the  
517 luciferase and renilla activity of these samples according to the manufacturer's  
518 instructions. Relative luciferase activity was first normalized with Renilla luciferase  
519 activity and then compared with those of the respective control. Wild-type and  
520 mutated CASP9 or RNF20 3' UTRs were synthesized and inserted into the  
521 p-MIR-REPORT plasmid by Genechem, Shanghai, China.

### 522 **Colony formation assay**

523 GC cells (500 cells/well in six-well) were performed to detect the proliferation

524 capacity. After incubation at 37 °C, 5% CO<sub>2</sub> for two weeks, the plates were washed  
525 with PBS, fixed with 4% paraformaldehyde, stained with 0.1% crystal violet, washed  
526 three times with water, and analyzed. The assay was repeated three times in duplicate,  
527 and the numbers of colony formation counted.

### 528 **Cell viability assay**

529 Cells ( $1 \times 10^4$ /well) were seeded in 96-well plates and treated with cisplatin from 0.2  
530 to 6.4 µg/ml for 24 h. A CCK-8 assay was performed to detect cells viability using a  
531 Cell Counting Kit 8 (Dojindo, Japan) and a OD450 nm (Synergy4; BioTek, Winooski,  
532 VT, USA). Based on protocols of CCK-8 kits cells were seeded, cultured for 24 h,  
533 and further cultured in 100 µL medium with 10 µL CCK-8 reagent. Absorbance at  
534 450 nm was determined using a Multiscan FC plate reader (Thermo Fisher).

### 535 **Cell Migration Assay**

536 The migratory capacity of GCs was tested by using a Transwell Boyden Chamber  
537 (6.5 mm, Costar) with polycarbonate membranes (8-µm pore size) on the bottom of  
538 the upper compartment. A total of  $2 \times 10^4$  cells was suspended in serum-free media.  
539 Meanwhile, the lower chambers were loaded with 0.5 mL RPMI1640 containing 5%  
540 FBS, and the plates containing Transwell inserts were incubated. After incubation at  
541 37 °C, 5% CO<sub>2</sub> for 12 h, the upper chamber was cleaned with a cotton swab, and the  
542 lower chamber was washed with PBS. The cells that penetrated through the  
543 membrane were fixed with 90% ethanol for 15 min at room temperature, stained with  
544 0.1% crystal violet solution, washed three times with water, and imaged by Inversion

545 Microscope (Zeiss, Germany). The assay was repeated three times in duplicate. We  
546 obtained images of migrated cells by using a photomicroscope, and we quantified cell  
547 migration by blind counting with five fields per chamber.

#### 548 **Apoptosis assay**

549 The flow cytometry analysis was performed by Annexin V-APC/PI Apoptosis  
550 Detection Kit (Vazyme, Jiangsu, China) according to the manufacturer' s instructions.  
551 The cells were analyzed with a BD FACS Calibur flow cytometer using CellQuest  
552 Pro software (FACS Calibur, BD Biosciences, USA).

#### 553 **TUNEL assay**

554 GC cells were fixed with paraformaldehyde for 30 min on ice. Then, terminal  
555 deoxynucleotidyl transferase dUTP nick end labeling (TUNEL) kit was used  
556 according to the manufacturer ' s instructions (TUNEL BrightGreen Apoptosis  
557 Detection Kit, Vazyme, Jiangsu, China) and DAPI (4' ,6-diamidino-2-phenylindole)  
558 was used for nuclear staining. TUNEL-positive areas were quantified under an  
559 Olympus FSX100 microscope (Olympus, Tokyo, Japan).

#### 560 **Fluorescence assay**

561 4',6-diamidino-2-phenylindole (DAPI) (Invitrogen, USA) was used for cell nuclear  
562 staining. Rhodamine-conjugated secondary antibody (Cell Signaling Technology,  
563 USA) for  $\gamma$ -H2AX (1:250, Abcam, ab81299) protein and DAPI for nuclear staining.  
564 The slides were visualized for immunofluorescence with a laser scanning microscope

565 (Zeiss, Germany).

566 **Western blot, immunohistochemistry (IHC), and immunoprecipitation (IP) assay**

567 Cell or tissue samples were lysed by RIPA buffer mixed with protease and  
568 phosphatase inhibitor cocktails. Serum proteins were extracted with Serum Protein  
569 Extraction Kit (Qcheng Bio, China). The proteins were then separated by 10%  
570 SDS-PAGE and transferred onto PVDF membranes. Western blot assays were  
571 performed according to previously reported data [1]

572 The immune-complexes were detected with ECL Western Blotting Substrate (Thermo  
573 Fisher) and visualized with BIO-RAD (BIO-RAD Gel Doc XR+, USA).  
574 Immunohistochemistry and immunoprecipitation were done as previously reported [2].  
575 Positive cells were counted in five random fields per slide. Primary antibodies and  
576 appropriate secondary antibodies used for the experiments are listed: TSG101  
577 (1:1000, Abcam, ab125011), Calnexin (1:1000, Abcam, ab92573), CD81 (1:1000,  
578 Proteintech, 66866-1-Ig), CD63 (1:1000, Abcam, ab134045),  $\gamma$ -H2AX (1:250,  
579 Abcam, ab81299), caspase-9 (1:1000, CST, # 9504S), caspase-3 (1:1000, CST, #  
580 9662), cleaved caspase-3 (1:1000, CST, # 9661), BAX (1:10000, Proteintech,  
581 50599-2-Ig), Bcl-2 (1:1000, CST, #3498), p53 (1:5000, Proteintech, 10442-1-AP),  
582 NEDD4L (1:5000, Proteintech, 13690-1-AP), RNF20(1:1000, Proteintech,  
583 21625-1-AP), Ubiquitin(1:1000, CST, # 3936S),  $\beta$ -actin (1:1000, Beyotime, AF0003),  
584 GAPDH (1:1000, Beyotime, AF0006). Incubation with the goat anti-rabbit secondary  
585 antibody (1:1000, Beyotime, A0208) or the goat anti-mouse secondary antibody

586 (1:1000, Beyotime, A0216).

### 587 **RNA in situ hybridization (ISH)**

588 BaseScope™ Reagent Kit v2-RED (Advanced Cell Diagnostics, CA, USA) was used  
589 for ISH following the user manual. RNA in situ hybridization (ISH) was performed  
590 according to previously reported data . Standard RNAScope protocols were used  
591 according to manufacturer's instructions and were performed according to previously  
592 reported data [3]. The following probes were used: miRNAscope Probe -  
593 SR-hsa-miR-769-5p-S1 (ACD; 1029501-S1), miRNAscope Positive Control Probe -  
594 SR-RNU6-S1 (ACD; 727871-S1), miRNAscope Negative Control Probe -  
595 SR-Scramble-S (ACD; 727881-S1).

### 596 **A nude mouse model**

597 4-week-old (BALB/c) were obtained from Model Animal Research Center Of  
598 Nanjing University, China. All the animals were housed in an environment with a  
599 temperature of  $22 \pm 1$  °C, relative humidity of  $50 \pm 1\%$ , and a light/dark cycle of  
600 12/12 hr and had access to water and food *at libitum*. All animal studies (including the  
601 mice euthanasia procedure) were done in compliance with the regulations and  
602 guidelines of Nanjing Medical University institutional animal care and conducted  
603 according to the AAALAC and the IACUC guidelines (IACUC-1902006)

604 a. Forty 4-week-old (BALB/c) male nude mice were randomly divided into two  
605 groups (20 mice in each group): BGC823+PBS and BGC823+BD EXO group.

606 Briefly,  $5 \times 10^6$  BGC823 cells (100 $\mu$ L) were subcutaneously injected into the right  
607 flank of nude mice. When the average volume of nude mice reached approx. 50mm<sup>3</sup>,  
608 one group was intratumorally injected with BGC/DDP EXO (200ug/100 $\mu$ L cells per  
609 mouse) once every two days. When the tumor volume was 150-200mm<sup>3</sup>, each group  
610 were divided into two groups (10 mice in each group): BGC823+PBS+PBS,  
611 BGC823+PBS+DDP, BGC823+BD EXO+PBS and BGC823+BD EXO+DDP group,  
612 one group (BGC823+PBS+DDP, BGC823+BD EXO+DDP) was intraperitoneally  
613 injected with DDP (4mg/kg per mouse) every three days, and the other group  
614 (BGC823+PBS+PBS, BGC823+BD EXO+PBS) was injected with normal saline as  
615 the control group.

616 b. Forty 4-week-old (BALB/c) male nude mice were randomly divided into two  
617 groups (20 mice in each group): BGC NC and BGC 769. BGC823 cells with stable  
618 overexpression of miR-769-5p (BGC 769) and control cells (BGC NC) ( $5 \times$   
619  $10^6$ /100 $\mu$ L cells per mouse) were subcutaneously injected into the right flank of nude  
620 mice. When the average volume of nude mice was about 150-200mm<sup>3</sup>, each group  
621 was divided into two groups: BGC NC+PBS, BGC 769+PBS, BGC NC+DDP and  
622 BGC 769+DDP. One group ( BGC/DDP anti769+DDP, BGC/DDP anti-NC+DDP)  
623 was intraperitoneally injected with DDP according to the standard of 4mg/kg every  
624 three days, and the other group (BGC NC+PBS, BGC 769+PBS) was  
625 intraperitoneally injected with normal saline as control.

626 c. Forty 4-week-old (BALB/c) male nude mice were randomly divided into two

627 groups: BGC/DDPanti-769 and BGC/DDP anti-NC, with 20 mice in each group.  
628 BGC/DDP cells and control cells with stable knockdown expression of miR-769-5p  
629 ( $5 \times 10^6/100 \mu\text{L}$  cells per mouse) were injected subcutaneously into the right flank of  
630 nude mice. When the average volume of nude mice was about  $150\text{-}200\text{mm}^3$ , each  
631 group was divided into two groups on average: BGC/DDPanti-769+PBS, BGC/DDP  
632 anti-NC+PBS, BGC/DDP anti769+DDP and BGC/DDP anti-NC+DDP. One group  
633 (BGC/DDP anti769+DDP, BGC/DDP anti-NC+DDP) was intraperitoneally injected  
634 with DDP according to the standard of  $4\text{mg/kg}$  every three days, and the other group  
635 (BGC/DDPanti-769+PBS, BGC/DDP anti-NC+PBS ) was intraperitoneally injected  
636 with normal saline as control.

637 Three weeks later, mice were sacrificed, and tumor tissues were prepared for  
638 histological examination: H&E staining, Western blot, and IHC assays. Tumor  
639 volume was measured using the following formula: *Tumor volume* ( $\text{mm}^3$ ) =  $0.5$   
640  $\times \text{width}^2 \times \text{length}$ .

#### 641 **Statistical analysis**

642 Statistical data were expressed as mean  $\pm$  SD. One-way analysis of variance was  
643 used for three groups and more than three groups. All of the statistical analyses were  
644 assessed by software SPSS version 13.0 (SPSS, Chicago, IL, USA) and GraphPad  
645 Prism (GraphPad Software, Inc., San Diego, CA, USA) software, comparisons among  
646 groups were done by the independent sample two-sided Student t-test. The ANOVA  
647 was performed to evaluate the statistical differences among groups. P- value of 0.05

648 or less was considered as statistical significance.

#### 649 **References:**

- 650 1. Zhou, J., Ye, J., Zhao, X., Li, A., and Zhou, J. (2008). JWA is required for arsenic  
651 trioxide induced apoptosis in HeLa and MCF-7 cells via reactive oxygen species and  
652 mitochondria linked signal pathway. *Toxicol Appl Pharmacol* 230: 33-40.
- 653 2. Qiu, D., et al. (2018). RNF185 modulates JWA ubiquitination and promotes  
654 gastric cancer metastasis. *Biochim Biophys Acta Mol Basis Dis* 1864: 1552-1561.
- 655 3. Xie, M., et al. (2020). Exosomal circSHKBP1 promotes gastric cancer  
656 progression via regulating the miR-582-3p/HUR/VEGF axis and suppressing HSP90  
657 degradation. *MOL CANCER* 19: 112.

#### 658 **Acknowledgements**

659 We appreciate Prof. Jianwei Zhou for providing technical assistance

#### 660 **Conflict of Interest**

661 The authors declare that they have no conflict of interest. All the animal experiments  
662 performed in this study were approved by the Institutional Animal Care and Use  
663 Committee of Nanjing Medical University. All animal experiments were approved by  
664 the the Institutional Animal Care and Use Committee of Nanjing Medical University.  
665 Human tissue study was approved by the Medical Ethics Committee of First  
666 Affiliated Hospital of Nanjing Medical University. Written informed consent was  
667 obtained from all participants.

#### 668 **Figure legends**



669 **Figure. 1. miR-769-5p is enriched in BGC823/DDP cell-derived exosomes**

670 A. Double-membrane exosomes purified from the supernatants of BGC823 and  
671 BGC8231/DDP cells were observed by Transmission Electron Microscopy (TEM). B.  
672 NanoSight particle tracking analysis (NTA) of the diameter and concentration of  
673 vesicles(particles/mL). C, D. Exosomal markers TSG101, CD9, CD81 and CD63  
674 were detected by Western blot and flow cytometry (FCM) to prove that the extract in  
675 exosomal protein purified from cell supernatants has the typical characteristics  
676 of exosomes. E, F. Cluster heat map and Volcano plot of differential miRNAs in  
677 exosomes purified from the supernatants of BGC823 and BGC823/DDP cells. G.  
678 qRT-PCR verified the relative expression of miR-769-5p in exosomes purified from  
679 the supernatants of BGC823, BGC823/DDP, SGC7901 and SGC7901/DDP cells. H.  
680 Different expression of miR-769-5p between 41 pairs of tumor and adjacent tumor, 41  
681 tumors and 346 adjacent tumors according to TCGA database. I, J. The positive rate  
682 (referring to the percentage of positive cells) of miR-769-5p in 75 pairs of gastric  
683 cancer tissues and adjacent tissues by RNA in situ hybridization (ISH). K. qRT-PCR  
684 detected the relative expression of miR-769-5p in serum exosomes of 60 cases  
685 (including 41 cisplatin-sensitive cases and 19 cisplatin-resistant cases) of GC patients.  
686 After chemotherapy, the level of serum miR-769-5p was significantly increased in  
687 non-response patients (n1=19) compared with response patients (n2=41). Quantitative  
688 data from three independent experiments are shown as the mean  $\pm$  SD (error bars).  
689 \*P < 0.05, \*\*P < 0.01, \*\*\*P < 0.001 (Student' s t-test)

690 **Fig're.2. Exosome-mediated transfer of miR-769-5p is required for GC**

691 **cisplatin-resistance and targets CASP9 directly**

692 A, B. The rates of BGC823 cells'apoptosis were reduced after being co-cultured with  
693 BD Exo (200ug/ml) for 24h and treated with cisplatin (0.4 ug/ml) for 24h detected by  
694 Hoechst nuclei staining and flow cytometry assay (FCM). C. The survival of BGC823  
695 or SGC7901 cells co-cultured with BD Exo or SD Exo (200ug/ml) for 24h and treated  
696 with cisplatin for 24h was detected by CCK-8. D. Red fluorescence was observed in  
697 the BGC823 or SGC7901 cells after co-cultured with BGC823/DDP or  
698 SGC7901/DDP cells for 24h which were transfected with the Cy3-miR-769-5p mimic  
699 (red fluorescence). E. Confocal microscopy showed internalization of exosomes in  
700 BGC823 or SGC7901 recipient cells after co-cultured with PKH26-labeled (red  
701 fluorescence) BD Exo or SD Exo for 24h. DAPI was used to stain the nuclei of  
702 BGC823 or SGC7901 recipient cells with blue fluorescence. F. Predicted binding  
703 sites of the CASP9 3' UTR by miR-769-5p. I. Luciferase reporter was carried out in  
704 HEK293T cotransduced with miR - 769-5p - mimics or miRNA control with firefly  
705 luciferase reporter plasmid containing either wild-type (WT) or mutant (MUT)  
706 CASP9 3' UTR (pGL3 - CASP9 - WT or pGL3 - CASP9 - MUT). G, H. PCR and  
707 Western blot confirmed that miR-769-5p negatively regulated the expression of  
708 CASP9. J. qRT-PCR showed the expression of miR-769-5p in in BGC anti-NC+ PBS,  
709 BGC anti-NC + BD Exo and BGC anti-769 + BD Exo. K, L. The mRNA and protein  
710 levels of CASP9 in BGC anti-NC+ PBS, BGC anti-NC + BD Exo and BGC anti-769  
711 + BD Exo. M, N. qRT-PCR and Western blot showed the expression of miR-769-5p  
712 in BGC+BD Exo DMSO and BGC+BD Exo GW4869. O, P. The upregulation of

713 CASP9 mRNA and protein was detected by qRT-PCR and Western blot in BGC+BD  
714 Exo GW4869 and BGC+BD anti-769 Exo. Quantitative data from three independent  
715 experiments are shown as the mean  $\pm$  SD (error bars). \*P < 0.05, \*\*P < 0.01, \*\*\*P  
716 < 0.001 (Student's t-test)

717 **Figure.3. Exosome-mediated transfer of miR-769-5p confers cisplatin resistance**  
718 **through downregulating CASP9**

719 A. Flow cytometry assay detected cell apoptosis rate of BGC anti-NC + PBS, BGC  
720 anti-NC + BD Exo, BGC anti-769 + BD Exo and BGC CASP9 + BD Exo. B. Flow  
721 cytometry assay detected cell apoptosis rate of BGC+BD Exo DMSO and BGC + BD  
722 Exo GW4869. C. Flow cytometry assay detected cell apoptosis rate of BGC + BD  
723 anti-NC Exo, BGC + BD anti-769 Exo and BGC + BD anti-769 + siCASP9 Exo. D.  
724 The level of  $\gamma$ -H2AX nuclear foci in BGC anti-NC + PBS, BGC anti-NC + BD Exo,  
725 BGC anti-769 + BD Exo and BGC CASP9 + BD Exo. E. The level of  $\gamma$ -H2AX  
726 nuclear foci in BGC+BD Exo DMSO and BGC+BD Exo GW4869. F. The level of  
727  $\gamma$ -H2AX nuclear foci in BGC+BD anti-NC Exo, BGC + BD anti-769 Exo and BGC  
728 + BD anti-769 + siCASP9 Exo. G. TUNEL analysis detected cell apoptosis rate of  
729 BGC anti-NC+PBS, BGC anti-NC + BD Exo, BGC anti-769 + BD Exo and BGC  
730 CASP9 + BD Exo. Quantitative data from three independent experiments are shown  
731 as the mean  $\pm$  SD (error bars). \*P < 0.05, \*\*P < 0.01, \*\*\*P < 0.001 (Student's  
732 t-test)

733 **Figure.4. Exosomal miR-769-5p promotes recipient cells proliferation and**  
734 **migration by downregulating CASP9**

735 A. TUNEL analysis detected cell apoptosis rate of BGC + BD Exo DMSO and BGC  
736 + BD Exo GW4869. B. TUNEL analysis detected cell apoptosis rate of BGC + BD  
737 anti-NC Exo, BGC + BD anti-769 Exo and BGC + BD anti-769 + siCASP9 Exo. C.  
738 The average colony numbers of three independent experiments were calculated in  
739 BGC anti-NC + PBS, BGC anti-NC + BD Exo, BGC anti-769 + BD Exo and BGC  
740 CASP9 + BD Exo. D. The average colony numbers of three independent experiments  
741 were calculated in BGC + BD Exo DMSO and BGC + BD Exo GW4869. E. The  
742 average colony numbers of three independent experiments were calculated in BGC +  
743 BD anti-NC Exo, BGC + BD anti-769 Exo and BGC + BD anti-769 + siCASP9 Exo.  
744 F. Migration ability of BGC anti-NC + PBS, BGC anti-NC + BD Exo, BGC anti-769  
745 + BD Exo and BGC CASP9 + BD Exo were assessed by Transwell assay. G.  
746 Migration ability of BGC + BD Exo DMSO and BGC+BD Exo GW4869 were  
747 assessed by Transwell assay. H. Migration ability of BGC+BD anti-NC Exo, BGC +  
748 BD anti-769 Exo and BGC + BD anti-769 + siCASP9 Exo were assessed by  
749 Transwell assay. Quantitative data from three independent experiments are shown as  
750 the mean  $\pm$  SD (error bars). \*P < 0.05, \*\*P < 0.01, \*\*\*P < 0.001 (Student's t-test)

751 **Figure.5. Exosomal miR-769-5p confers cisplatin resistance through**  
752 **downregulating CASP9 along with subsequent evasion of apoptosis and**  
753 **confirmed in vivo**

754 Western blot analysis of caspase9, caspase3 and cleaved caspase3 in BGC + BD  
755 anti-NC Exo, BGC + BD anti-769 Exo and BGC + BD anti-769 + siCASP9 Exo. B.  
756 Western blot analysis of caspase9, caspase3 and cleaved caspase3 in BGC + BD Exo

757 DMSO and BGC + BD Exo GW4869. C. Western blot analysis of caspase9, caspase3  
758 and cleaved caspase3 in BGC + BD anti-NC Exo, BGC + BD anti-769 Exo and BGC  
759 + BD anti-769 + siCASP9 Exo. D. Subcutaneous xenograft assay of BGC823 cells  
760 with or without BD Exo (200ug/100µL cells per mouse) once every two days in nude  
761 mice with PBS or cisplatin (DDP, 4mg/kg) treatment. E. Tumor volume of xenograft  
762 models were measured every two days and shown.  $Tumor\ volume\ (mm^3) = 0.5$   
763  $\times width^2 \times length$ . F. Tumor weight of xenograft models were measured every two  
764 days and shown. G. CASP9, cleaved caspase3 and p53 expression levels were shown  
765 in representative xenograft tumors by Immunohistochemistry (IHC) (400x  
766 magnification, scale bars = 50 µ m). Results are presented as mean SD. \*P < 0.05,  
767 \*\*P < 0.01, \*\*\*P < 0.001

768 **Figure.6. miR-769-5p promotes ubiquitin-mediated p53 protein degradation in**  
769 **GC cells**

770 A. KEGG enrichment analysis showed that the target genes of differentially  
771 expressed miRNAs are enriched in the p53 pathway. B. qPCR detected the expression  
772 level of p53 mRNA in BGC NC, BGC mimic-769 and BGC inhibitor-769. C.  
773 Western blot analysis of expression level of p53 protein in in BGC NC, BGC  
774 mimic-769 and BGC inhibitor-769. D. UbiBrowser website predicted E3  
775 ubiquitination ligase with p53 as a substrate. E. Western blot analysis of p53 protein  
776 level of 100ug/ml treated with cycloheximide (CHX) changes with treatment time (0h,  
777 1h, 4h). F. Analysis of p53 protein level by Western blot in BGC nc and BGC  
778 inhibitor-769 after treatment of MG-132 (10um) for 6h. G. Western blot analysis of

779 p53 protein expression level after transfection of E3 ubiquitinated ligase specific  
780 small interfering RNA (siRNA): siFBXO11, siMIB2, siMIB1, siITCH and  
781 siNEDD4L. H. Co-IP detected the interaction between NEDD4L and p53 in gastric  
782 cancer cells. I. Co-IP and western blot detected p53 ubiquitination modification  
783 mediated by NEDD4L. J, K. The expression of NEDD4L and p53 protein levels when  
784 miR-769-5p is knocked down or overexpressed. L, M. PCR and Western blot verified  
785 the negatively regulatory effects of miR-769-5p on RNF20. N. Predicted binding sites  
786 of the RNF20 3' UTR by miR-769-5p. O. Luciferase reporter was carried out in  
787 HEK293T cotransduced with miR-769-5p-mimics or miRNA control with  
788 pGL3-RNF20-WT or pGL3-RNF20-MUT. Quantitative data from three independent  
789 experiments are shown as the mean  $\pm$  SD (error bars). \*P < 0.05, \*\*P < 0.01, \*\*\*P  
790 < 0.001 (Student's t-test)

791 **Figure.7. E3 ubiquitination ligase RNF20 participates in miR-769-5p mediated**  
792 **p53 protein ubiquitination in GC cells**

793 A. TUNEL analysis detected cell apoptosis rate of BGC NC, BGC HA-RNF20 and  
794 BGC si-RNF20. B. The level of  $\gamma$ -H2AX nuclear foci in BGC NC, BGC  
795 HA-RNF20 and BGC si-RNF20. C. The western blot analysis of Bax, Bcl-2 and  
796 cleaved caspase 3 proved the positive mediation of RNF20 on apoptosis. D, E, F. The  
797 recovery proved that miR-769-5p inhibits the process of apoptosis by down-regulating  
798 RNF20 by analysis of TUNEL and western blot. G, H. Flow cytometry assay proved  
799 that miR-769-5p inhibits the process of apoptosis by down-regulating RNF20. I. The  
800 protein levels of NEDD4L and p53 when RNF20 overexpression and knockdown. J.

801 Co-immunoprecipitation proves that NEDD4L interacts with RNF20. K, L.  
802 Co-immunoprecipitation proves that the ubiquitination modification of NEDD4L is  
803 mediated by RNF20 Quantitative data from three independent experiments are shown  
804 as the mean  $\pm$  SD (error bars). \*P < 0.05, \*\*P < 0.01, \*\*\*P < 0.001 (Student's  
805 t-test)

806 **Figure.8. Exosomal miR-769-5p induces cisplatin resistance and promotes the**  
807 **tumorigenesis of GC in vivo**

808 A. Subcutaneous xenograft assay of BGC823/DDP cells ( $5 \times 10^6$  cells/100 $\mu$ L) with  
809 or without miR-769-5p knockdwn in nude mice with PBS or cisplatin (DDP, 4mg/kg)  
810 treatment. B. Tumor volume of xenograft models were measured every two days and  
811 shown. C. Tumor weight of xenograft models were measured every two days and  
812 shown. D. Levels of exosomal miR-769-5p in the serum were detected by qPCR. E.  
813 CASP9, cleaved caspase3 and p53 expression levels were shown in representative  
814 xenograft tumors by Immunohistochemistry (IHC) (400x magnification, scale bars =  
815 50  $\mu$  m). F. Subcutaneous xenograft assay of BGC823 cells ( $5 \times 10^6$  cells/100 $\mu$ L)  
816 with or without miR-769-5p overexpressed in nude mice with PBS or cisplatin (DDP,  
817 4mg/kg) treatment. G. Tumor volume of xenograft models were measured every two  
818 days and shown. H. Tumor weight of xenograft models were measured every two  
819 days and shown. I. Levels of exosomal miR-769-5p in the serum were detected by  
820 qPCR. J. CASP9, cleaved caspase3 and p53 expression levels were shown in  
821 representative xenograft tumors by Immunohistochemistry (IHC) (400x magnification,  
822 scale bars = 50  $\mu$  m). K. Summary of the mechanism by which exosomal

823 miR-769-5p induces cisplatin resistance. Results are presented as mean SD. \*P < 0.05,

824 \*\*P < 0.01, \*\*\*P < 0.001

825 **Figure.S1.** A. 5 most upregulated and downregulated miRNAs (hsa-miR-769-5p,

826 hsa-miR-30a-5p, hsa-miR-365b-3p, hsa-miR-21-3p, hsa-miR-193b-5p) were selected

827 based on the fold change and p value according to the result of differences in miRNAs

828 expressed in two cell-derived exosome populations by using sequencing analysis. B.

829 qPCR of miR-365-3p and miR-769-5p expression in exosomes released by BGC823,

830 BGC823/DDP, SGC7901, SGC7901/DDP and found that the miR-769-5p expression

831 was markedly higher in BD Exo and SD Exo. C. TCGA showed the expression of 4

832 miRNAs (hsa-miR-30a-5p, hsa-miR-365b-3p, hsa-miR-21-3p, hsa-miR-193b-5p)

833 excluding miR-769-5p in GC and adjacent normal. D. IC50 of BGC823,

834 BGC823/DDP, SGC7901, SGC7901/DDP cell lines. E. (related to Figure.2L), G.

835 (related to Figure.2K) The mRNA and protein levels of CASP9 in SGC anti-NC+

836 PBS, SGC anti-NC + SD Exo and SGC anti-769 + SD Exo. F. (related to Figure.2J)

837 qRT-PCR showed the expression of miR-769-5p in in SGC anti-NC + PBS, SGC

838 anti-NC + SD Exo and SGC anti-769 + SD Exo. H. (related to Figure.2N), I.

839 (related to Figure.2M) RT-PCR and Western blot showed the expression of

840 miR-769-5p in SGC + SD Exo DMSO and SGC + SD Exo GW4869. J. (related to

841 Figure.2O), K. (related to Figure.2P) The upregulation of CASP9 mRNA and protein

842 was detected by qRT-PCR and Western blot in SGC + SD Exo GW4869 compared to

843 SGC + SD anti-769 Exo. Quantitative data from three independent experiments are

844 shown as the mean  $\pm$  SD (error bars). \*P < 0.05, \*\*P < 0.01, \*\*\*P < 0.001



845 (Student's t-test)

846 **Figure.S2.** A. (related to Figure.3A) Flow cytometry assay detected cell apoptosis  
847 rate of SGC anti-NC + PBS, SGC anti-NC + SD Exo, SGC anti-769 + SD Exo and  
848 SGC CASP9 + SD Exo. B. (related to Figure.3B) Flow cytometry assay detected cell  
849 apoptosis rate of SGC + SD Exo DMSO and SGC + SD Exo GW4869. C. (related to  
850 Figure.3C) Flow cytometry assay detected cell apoptosis rate of SGC + SD anti-NC  
851 Exo, SGC + SD anti-769 Exo and SGC + SD anti-769 + siCASP9 Exo. D. (related to  
852 Figure.4C) The average colony numbers of three independent experiments were  
853 calculated in SGC anti-NC + PBS, SGC anti-NC + SD Exo, SGC anti-769 + SD Exo  
854 and SGCCASP9 + SD Exo. E. (related to Figure.4D) The average colony numbers of  
855 three independent experiments were calculated in BGC + SD Exo DMSO and BGC +  
856 SD Exo GW4869. F. (related to Figure.4E) The average colony numbers of three  
857 independent experiments were calculated in BGC + SD anti-NC Exo, BGC + SD  
858 anti-769 Exo and BGC + SD anti-769 + siCASP9 Exo. G. (related to Figure.4F)  
859 Migration and invasion ability of SGC anti-NC + PBS, SGC anti-NC+SD Exo, SGC  
860 anti-769+ SD Exo and SGCCASP9 + SD Exo were assessed by Transwell assay. H.  
861 (related to Figure.4G) Migration and invasion ability of BGC + SD Exo DMSO and  
862 BGC + SD Exo GW4869 were assessed by Transwell assay. I. (related to Figure.4H)  
863 Migration and invasion ability of BGC + SD anti-NC Exo, BGC + SD anti-769 Exo  
864 and BGC + SD anti-769 + siCASP9 Exo were assessed by Transwell assay.  
865 Quantitative data from three independent experiments are shown as the mean  $\pm$  SD  
866 (error bars). \*P < 0.05, \*\*P < 0.01, \*\*\*P < 0.001 (Student's t-test)

867 **Figure.S3.** A. (related to Figure.3D) The level of  $\gamma$ -H2AX nuclear foci in SGC  
868 anti-NC + PBS, SGC anti-NC + SD Exo, SGC anti-769 + SD Exo and SGC CASP9+  
869 SD Exo. B. (related to Figure.3E) The level of  $\gamma$ -H2AX nuclear foci in SGC + SD  
870 Exo DMSO and SGC + SD Exo GW4869. C. (related to Figure.3F) The level of  $\gamma$   
871 -H2AX nuclear foci in SGC + SD anti-NC Exo, SGC + SD anti-769 Exo and SGC +  
872 SD anti-769 + siCASP9 Exo. D. (related to Figure.3G) TUNEL analysis detected  
873 cell apoptosis rate of SGC anti-NC + PBS, SGC anti-NC + SD Exo, SGC anti-769 +  
874 SD Exo and SGC CASP9 + SD Exo. E. (related to Figure.4A) TUNEL analysis  
875 detected cell apoptosis rate of BGC + SD Exo DMSO and BGC + SD Exo GW4869.  
876 F. (related to Figure.4B) TUNEL analysis detected cell apoptosis rate of BGC +  
877 SD anti-NC Exo, BGC + SD anti-769 Exo and BGC + SD anti-769 + siCASP9 Exo.  
878 Quantitative data from three independent experiments are shown as the mean  $\pm$  SD  
879 (error bars). \*P < 0.05, \*\*P < 0.01, \*\*\*P < 0.001 (Student's t-test)

880 **Figure.S4.** A. (related to Figure.5A) Western blot analysis of caspase9, caspase3 and  
881 cleaved caspase3 in SGC + SD anti-NC Exo, SGC + SD anti-769 Exo and SGC + SD  
882 anti-769 + siCASP9 Exo. B. (related to Figure.5B) Western blot analysis of caspase9,  
883 caspase3 and cleaved caspase3 in SGC + SD Exo DMSO and SGC + SD Exo  
884 GW4869. C. (related to Figure.5C) Western blot analysis of caspase9, caspase3 and  
885 cleaved caspase3 in SGC + SD anti-NC Exo, SGC + SD anti-769 Exo and SGC +SD  
886 anti-769+siCASP9 Exo. D. (related to Figure.6E) Western blot analysis of p53  
887 protein level of 100ug/ml treated with cycloheximide (CHX) changes with treatment  
888 time. E. (related to Figure.6F)Western blot analysis of p53 protein level after

889 MG-132 (10um) treatment. F. (related to Figure.6H) Co-IP detected the interaction  
890 between NEDD4L and p53 in SGC cells. I. Co-IP and western blot detected. G.  
891 (related to Figure.6I) p53 ubiquitination modification mediated by NEDD4L. H.  
892 (related to Figure.6J), I. (related to Figure.6K) The expression of NEDD4L and p53  
893 protein levels when miR-769-5p is knocked down or overexpressed. Quantitative data  
894 from three independent experiments are shown as the mean  $\pm$  SD (error bars). \*P <  
895 0.05, \*\*P < 0.01, \*\*\*P < 0.001 (Student's t-test)

896 **Figure.S5.** A. (related to Figure.7A) TUNEL analysis detected cell apoptosis rate of  
897 SGC NC, SGC HA-RNF20 and SGC si-RNF20. B. (related to Figure.7B) The level  
898 of  $\gamma$ -H2AX nuclear foci in SGC NC, SGC HA-RNF20 and SGC si-RNF20. C  
899 (related to Figure.7D), D (related to Figure.7E). The recovery proved that  
900 miR-769-5p inhibits the process of apoptosis by down-regulating RNF20 by analysis  
901 of TUNEL. Quantitative data from three independent experiments are shown as the  
902 mean  $\pm$  SD (error bars). \*P < 0.05, \*\*P < 0.01, \*\*\*P < 0.001 (Student's t-test)

903 **Figure.S6.** A. (related to Figure.7C), B (related to Figure.7F) The western blot  
904 analysis of Bax, Bcl-2 and cleaved caspase 3 proved the mediation of RNF20 on  
905 apoptosis. C. (related to Figure.7G) The protein levels of NEDD4L and p53 when  
906 RNF20 overexpression and knockdown. D. (related to Figure.7I) Co-IP proved that  
907 NEDD4L interacts with RNF20. E. (related to Figure.7J), F (related to Figure.7K)  
908 Co-IP proved that the ubiquitination modification of NEDD4L is mediated by RNF20.  
909 Quantitative data from three independent experiments are shown as the mean  $\pm$  SD  
910 (error bars). \*P < 0.05, \*\*P < 0.01, \*\*\*P < 0.001 (Student's t-test)

911 **Tables**

912 **Table1.** Correlation of relative miR-769-5p expression with the clinicopathological  
 913 characteristics of 150 patients with gastric cancer.

| Relationship between miR-769-5p expression and clinicopathologic factors of patients with gastric cancer |                 |                 |                  |                  |
|----------------------------------------------------------------------------------------------------------|-----------------|-----------------|------------------|------------------|
| Parameter                                                                                                | No. of patients | miR-769-5p(low) | miR-769-5p(high) | Pvalue (*P<0.05) |
| Sex                                                                                                      |                 |                 |                  |                  |
| Male                                                                                                     | 51              | 23              | 23               | 0.285            |
| Female                                                                                                   | 24              | 14              | 14               |                  |
| Age (year)                                                                                               |                 |                 |                  |                  |
| <60                                                                                                      | 60              | 33              | 27               | 0.133            |
| ≥60                                                                                                      | 15              | 5               | 10               |                  |
| Tumor size (cm)                                                                                          |                 |                 |                  |                  |
| < 5                                                                                                      | 23              | 16              | 7                | 0.029            |
| ≥5                                                                                                       | 52              | 22              | 30               |                  |
| Differentiation grade                                                                                    |                 |                 |                  |                  |
| well-moderate                                                                                            | 43              | 26              | 17               | 0.049            |
| poor-undifferentiation                                                                                   | 32              | 12              | 20               |                  |
| T stage                                                                                                  |                 |                 |                  |                  |
| T1-T2                                                                                                    | 7               | 6               | 1                | 0.051            |
| T3-T4                                                                                                    | 68              | 32              | 36               |                  |
| Lymph node status                                                                                        |                 |                 |                  |                  |
| Negative                                                                                                 | 23              | 17              | 6                | 0.007            |
| Positive                                                                                                 | 52              | 21              | 31               |                  |
| Distant metastasis                                                                                       |                 |                 |                  |                  |
| M0                                                                                                       | 75              | 38              | 37               |                  |
| M1                                                                                                       | 0               | 0               | 0                |                  |
| TNM stage                                                                                                |                 |                 |                  |                  |
| I-II                                                                                                     | 31              | 21              | 10               | 0.013            |
| III-IV                                                                                                   | 44              | 17              | 27               |                  |

914 **Additional file 2: Table S1. All sequences of siRNAs are listed.**

| NAME     | TARGETING SEQUENCE (5'- 3') | Si-RNA2                 | Si-RNA3             |
|----------|-----------------------------|-------------------------|---------------------|
| si-CASP9 | GTCGAAGCCAACCCTAG<br>AA     | GTCGAAGCCAACCCTA<br>GAA | GCTTCGTTTCTGCGAACTA |
| si-TP53  | GCTTCGTTTCTGCGAACT<br>A     | AGAGAATCTCCGCAAG<br>AAA | GGAGTATTTGGATGACAGA |

|           |                                |                               |                               |
|-----------|--------------------------------|-------------------------------|-------------------------------|
| si-FBXO11 | CCCAATTATTAGACGGA<br>AT        | AGTCCATACCAACTTC<br>GTA       | GTAGCCCTATTATTGATCA           |
| si-MIB2   | GAAGUGUGCAGAGUGU<br>ACAAAUUUAU | GACUGAUGGAAUGUU<br>UGAGACUUUA | UUCUCAUCCACAAUCCAUGG<br>UCUUG |
| si-MIB1   | GAACGAAGAGTGCCTTT<br>CA        | GGACAAGGATAATACC<br>AAT       | GAAGAAAGATGATGGTTAT           |
| si-ITCH   | GTATGACCTACAGGATC<br>A         | CAGCGGTATTCCAGGA<br>TTA       | GATGAACCTCTTTCAGAAA           |
| si-NEDD4L | CUUCGGUCCUGCAGUG<br>UUA        | CGACCCAGCUUGAUGG<br>AUG       | AGUCAUAAAUCUCGAGUCA           |
| si-RNF20  | GCGAATCAAGTCTAATC<br>AG        | CGCATCATCTTAAAC<br>GTT        | GGAGAGAGAACGAGAGAAA           |

915 **Additional file 2: Table S2. The related primers are synthesized.**

| GENE            | FORWARD<br>PRIMER(5'-3')     | REVERSE<br>PRIMER(5'-3')      | LOOP                                                   |
|-----------------|------------------------------|-------------------------------|--------------------------------------------------------|
| hsa-miR-365b-3p | AGCCCGCCTAATG<br>CCCCTAAAAAT | CGCAGGGTCCGAG<br>GTATTC       | GTCGTATCCAGTGCAGGGTCCGAGGTAT<br>TCGCACTGGATACGACATAAGG |
| hsa-miR-769-5P  | ATCGGGCTGAGAC<br>CTCTGGGTTC  | CGCAGGGTCCGAG<br>GTATTC       | GTCGTATCCAGTGCAGGGTCCGAGGTAT<br>TCGCACTGGATACGACAGCTCA |
| u6              | CTCGCTTCGGCAG<br>CACA        | AACGCTTCACGAA<br>TTTGCCT      |                                                        |
| GAPDH           | CATGTGGGCCATG<br>AGGTCCACCAC | GGGAAGCTCACTG<br>GCATGGCCTTCC |                                                        |
| CASP9           | CGAACTAACAGGC<br>AAGCAGCAAAG | AGAGCACCGACAT<br>CACCAAATCC   |                                                        |
| TP53            | CAGCACATGACGG<br>AGGTTGT     | TCATCCAAATACTC<br>CACACGC     |                                                        |
| FBXO11          | GCCGAAAAGAACA<br>GCGTGTC     | GTTTTGCACGATGA<br>CCAAAGTT    |                                                        |
| MIB1            | ATGAGTAACTCCC<br>GGAATAACCG  | GCCGTTGTCCCA<br>CTACC         |                                                        |
| MIB2            | ACCTGCTGCTGTAC<br>GACAAC     | GTGCATGTAGCACT<br>GCGTG       |                                                        |
| ITCH            | TGATGATGGCTCC<br>AGATCCAA    | GACTCTCCTATTTT<br>CACCAGCTC   |                                                        |
| NEDD4L          | GGGAAGCGGTGTT<br>TTGT        | CTCCTCTCCAGCCG<br>AAT         |                                                        |
| RNF20           | GAACAGCGACTCA<br>ACCGACA     | GGAATTCACCCGTT<br>CTAGGACTT   |                                                        |

916 **Abbreviations**

- 917 gastric cancer (GC)
- 918 MicroRNA (miRNA)
- 919 ubiquitin-proteasome system (UPS)
- 920 NanoSight particle tracking analysis (NTA)
- 921 flow cytometry (FCM)
- 922 BGC823/DDP secreted exosomes (BD Exo)
- 923 BGC secreted exosomes (BC Exo)
- 924 tumor microenvironment (TME)
- 925 BGC823 cells with lentiviral vectors stably expressing miR-769-5p inhibitor (BGC
- 926 anti-769)
- 927 negative control miRNA inhibitor (BGC anti-NC)
- 928 BGC823 cells with lentiviral vectors stably expressing CASP9 (BGC CASP9)
- 929 cycloheximide (CHX)
- 930 small interfering RNA (siRNA)
- 931 Co-immunoprecipitation (CoIP)
- 932 **Funding**

933 This work was supported by grants from the Provincial Science and Technology  
934 Department Clinical Frontier Technology BE2020783(ZE20), the National Natural  
935 Science Foundation of China (No.81802381; No. 81772475; No. 81672896) and the  
936 Postgraduate Research & Practice Innovation Program of Jiangsu Province  
937 (KYCX19\_1164).

938 **References:**

- 939 1. Kroemer, G., and Reed, J. C. (2000). Mitochondrial control of cell death. *NAT*  
940 *MED* 6: 513-519.
- 941 2. Helleday, T., Petermann, E., Lundin, C., Hodgson, B., and Sharma, R. A. (2008).  
942 DNA repair pathways as targets for cancer therapy. *NAT REV CANCER* 8: 193-204.
- 943 3. Wagner, A. D., et al. (2017). Chemotherapy for advanced gastric cancer.  
944 *Cochrane Database Syst Rev* 8: D4064.
- 945 4. Sabari, J. K., Lok, B. H., Laird, J. H., Poirier, J. T., and Rudin, C. M. (2017).  
946 Unravelling the biology of SCLC: implications for therapy. *NAT REV CLIN ONCOL*  
947 14: 549-561.
- 948 5. Shivapurkar, N., et al. (2002). Differential inactivation of caspase-8 in lung  
949 cancers. *CANCER BIOL THER* 1: 65-69.
- 950 6. Rupaimoole, R., Calin, G. A., Lopez-Berestein, G., and Sood, A. K. (2016).  
951 miRNA Deregulation in Cancer Cells and the Tumor Microenvironment. *CANCER*  
952 *DISCOV* 6: 235-246.
- 953 7. Yuan, L., Xu, Z. Y., Ruan, S. M., Mo, S., Qin, J. J., and Cheng, X. D. (2020).  
954 Long non-coding RNAs towards precision medicine in gastric cancer: early diagnosis,

- 955 treatment, and drug resistance. *MOL CANCER* 19: 96.
- 956 8. Nagy, Z. B., Wichmann, B., Kalmar, A., Bartak, B. K., Tulassay, Z., and Molnar,  
957 B. (2016). miRNA Isolation from FFPE Specimen: A Technical Comparison of  
958 miRNA and Total RNA Isolation Methods. *PATHOL ONCOL RES* 22: 505-513.
- 959 9. Shi, Y. (2002). Mechanisms of caspase activation and inhibition during apoptosis.  
960 *MOL CELL* 9: 459-470.
- 961 10. Zaslona, Z., et al. (2020). Caspase-11 promotes allergic airway inflammation.  
962 *NAT COMMUN* 11: 1055.
- 963 11. Hanahan, D., and Weinberg, R. A. (2011). Hallmarks of cancer: the next  
964 generation. *CELL* 144: 646-674.
- 965 12. Wu, Y., Dong, G., and Sheng, C. (2020). Targeting necroptosis in anticancer  
966 therapy: mechanisms and modulators. *ACTA PHARM SIN B* 10: 1601-1618.
- 967 13. Eastman, A. (1990). Activation of programmed cell death by anticancer agents:  
968 cisplatin as a model system. *Cancer Cells* 2: 275-280.
- 969 14. Gabizon, A. A., Patil, Y., and La-Beck, N. M. (2016). New insights and evolving  
970 role of pegylated liposomal doxorubicin in cancer therapy. *Drug Resist Updat* 29:  
971 90-106.
- 972 15. Hu, H. M., et al. (2018). A Quantitative Chemotherapy Genetic Interaction Map  
973 Reveals Factors Associated with PARP Inhibitor Resistance. *CELL REP* 23: 918-929.
- 974 16. Fraser, M., Bai, T., and Tsang, B. K. (2008). Akt promotes cisplatin resistance in  
975 human ovarian cancer cells through inhibition of p53 phosphorylation and nuclear  
976 function. *INT J CANCER* 122: 534-546.



- 977 17. Liu, Z., Miers, W. R., Wei, L., and Barrett, E. J. (2000). The  
978 ubiquitin-proteasome proteolytic pathway in heart vs skeletal muscle: effects of acute  
979 diabetes. *Biochem Biophys Res Commun* 276: 1255-1260.
- 980 18. Liu, C. H., Goldberg, A. L., and Qiu, X. B. (2007). New insights into the role of  
981 the ubiquitin-proteasome pathway in the regulation of apoptosis. *Chang Gung Med*  
982 *J* 30: 469-479.
- 983 19. Vugmeyster, Y., Borodovsky, A., Maurice, M. M., Maehr, R., Furman, M. H.,  
984 and Ploegh, H. L. (2002). The ubiquitin-proteasome pathway in thymocyte apoptosis:  
985 caspase-dependent processing of the deubiquitinating enzyme USP7 (HAUSP). *MOL*  
986 *IMMUNOL* 39: 431-441.
- 987 20. Daulny, A., and Tansey, W. P. (2009). Damage control: DNA repair,  
988 transcription, and the ubiquitin-proteasome system. *DNA Repair (Amst)* 8: 444-448.
- 989 21. McBride, W. H., Iwamoto, K. S., Syljuasen, R., Pervan, M., and Pajonk, F.  
990 (2003). The role of the ubiquitin/proteasome system in cellular responses to radiation.  
991 *ONCOGENE* 22: 5755-5773.
- 992 22. Chao, C. C. (2015). Mechanisms of p53 degradation. *CLIN CHIM ACTA* 438:  
993 139-147.
- 994 23. Kasthuber, E. R., and Lowe, S. W. (2017). Putting p53 in Context. *CELL* 170:  
995 1062-1078.
- 996 24. Muller, P. A., and Vousden, K. H. (2013). p53 mutations in cancer. *NAT CELL*  
997 *BIOL* 15: 2-8.
- 998 25. Gao, S., et al. (2009). Ubiquitin ligase Nedd4L targets activated Smad2/3 to limit

- 999 TGF-beta signaling. *MOL CELL* 36: 457-468.
- 1000 26. Novellademunt, L., et al. (2020). NEDD4 and NEDD4L regulate Wnt signalling  
1001 and intestinal stem cell priming by degrading LGR5 receptor. *EMBO J* 39: e102771.
- 1002 27. Wei, Y., et al. (2020). NEDD4L-mediated Merlin ubiquitination facilitates Hippo  
1003 pathway activation. *EMBO REP* 21: e50642.
- 1004 28. In, S., Kim, Y. I., Lee, J. E., and Kim, J. (2019). RNF20/40-mediated  
1005 eEF1BdeltaL monoubiquitylation stimulates transcription of heat shock-responsive  
1006 genes. *NUCLEIC ACIDS RES* 47: 2840-2855.
- 1007 29. Wu, C., Cui, Y., Liu, X., Zhang, F., Lu, L. Y., and Yu, X. (2020). The RNF20/40  
1008 complex regulates p53-dependent gene transcription and mRNA splicing. *J MOL*  
1009 *CELL BIOL* 12: 113-124.
- 1010 30. Ham, I. H., et al. (2019). Targeting interleukin-6 as a strategy to overcome  
1011 stroma-induced resistance to chemotherapy in gastric cancer. *MOL CANCER* 18: 68.
- 1012 31. Wagner, A. D., et al. (2017). Chemotherapy for advanced gastric cancer.  
1013 *Cochrane Database Syst Rev* 8: D4064.
- 1014 32. Ghamloush, F., et al. (2019). The PAX3-FOXO1 oncogene alters exosome  
1015 miRNA content and leads to paracrine effects mediated by exosomal miR-486. *Sci*  
1016 *Rep* 9: 14242.
- 1017 33. Huang, C., et al. (2021). Human mesenchymal stem cells promote ischemic  
1018 repairment and angiogenesis of diabetic foot through exosome miRNA-21-5p. *STEM*  
1019 *CELL RES* 52: 102235.
- 1020 34. Kyuno, D., Zhao, K., Bauer, N., Ryschich, E., and Zoller, M. (2019). Therapeutic

- 1021 Targeting Cancer-Initiating Cell Markers by Exosome miRNA: Efficacy and  
1022 Functional Consequences Exemplified for claudin7 and EpCAM. *TRANSL ONCOL*  
1023 12: 191-199.
- 1024 35. Binenbaum, Y., et al. (2018). Transfer of miRNA in Macrophage-Derived  
1025 Exosomes Induces Drug Resistance in Pancreatic Adenocarcinoma. *CANCER RES* 78:  
1026 5287-5299.
- 1027 36. Fang, Y., et al. (2019). Exosomal miRNA-106b from cancer-associated fibroblast  
1028 promotes gemcitabine resistance in pancreatic cancer. *EXP CELL RES* 383: 111543.
- 1029 37. Qu, L., et al. (2016). Exosome-Transmitted lncARSR Promotes Sunitinib  
1030 Resistance in Renal Cancer by Acting as a Competing Endogenous RNA. *CANCER*  
1031 *CELL* 29: 653-668.
- 1032 38. Chehab, N. H., Malikzay, A., Stavridi, E. S., and Halazonetis, T. D. (1999).  
1033 Phosphorylation of Ser-20 mediates stabilization of human p53 in response to DNA  
1034 damage. *Proc Natl Acad Sci U S A* 96: 13777-13782.
- 1035 39. Shono, T., Tofilon, P. J., Schaefer, T. S., Parikh, D., Liu, T. J., and Lang, F. F.  
1036 (2002). Apoptosis induced by adenovirus-mediated p53 gene transfer in human  
1037 glioma correlates with site-specific phosphorylation. *CANCER RES* 62: 1069-1076.
- 1038 40. Moll, U. M., and Petrenko, O. (2003). The MDM2-p53 interaction. *MOL*  
1039 *CANCER RES* 1: 1001-1008.
- 1040 41. Zhao, K., et al. (2018). Regulation of the Mdm2-p53 pathway by the ubiquitin E3  
1041 ligase MARCH7. *EMBO REP* 19: 305-319.
- 1042 42. Amato, R., et al. (2009). Sgk1 activates MDM2-dependent p53 degradation and

1043 affects cell proliferation, survival, and differentiation. *J Mol Med (Berl)* 87:  
1044 1221-1239.

1045 43. Ghosh, A., Chen, T. C., and Kapila, Y. L. (2010). Anoikis triggers  
1046 Mdm2-dependent p53 degradation. *MOL CELL BIOCHEM* 343: 201-209.

1047 44. Shema, E., et al. (2017). Corrigendum: The histone H2B-specific ubiquitin ligase  
1048 RNF20/hBRE1 acts as a putative tumor suppressor through selective regulation of  
1049 gene expression. *Genes Dev* 31: 1926.

1050 45. Shema, E., et al. (2008). The histone H2B-specific ubiquitin ligase  
1051 RNF20/hBRE1 acts as a putative tumor suppressor through selective regulation of  
1052 gene expression. *Genes Dev* 22: 2664-2676.

1053

**Figure. 1. miR-769-5p is enriched in BGC823/DDP cell-derived exosomes**

A. Double-membrane exosomes purified from the supernatants of BGC823 and BGC8231/DDP cells were observed by Transmission Electron Microscopy (TEM). B. NanoSight particle tracking analysis (NTA) of the diameter and concentration of vesicles (particles/mL). C, D. Exosomal markers TSG101, CD9, CD81 and CD63 were detected by Western blot and flow cytometry (FCM) to prove that the extract in exosomal protein purified from cell supernatants has the typical characteristics of exosomes. E, F. Cluster heat map and Volcano plot of differential miRNAs in exosomes purified from the supernatants of BGC823 and BGC823/DDP cells. G. qRT-PCR verified the relative expression of miR-769-5p in exosomes purified from the supernatants of BGC823, BGC823/DDP, SGC7901 and SGC7901/DDP cells. H. Different expression of miR-769-5p between 41 pairs of tumor and adjacent tumor, 41 tumors and 346 adjacent tumors according to TCGA database. I, J. The positive rate (referring to the percentage of positive cells) of miR-769-5p in 75 pairs of gastric cancer tissues and adjacent tissues by RNA in situ hybridization (ISH). K. qRT-PCR detected the relative expression of miR-769-5p in serum exosomes of 60 cases (including 41 cisplatin-sensitive cases and 19 cisplatin-resistant cases) of GC patients. After chemotherapy, the level of serum miR-769-5p was significantly increased in non-response patients (n1=19) compared with response patients (n2=41). Quantitative data from three independent experiments are shown as the mean  $\pm$  SD (error bars). \*P < 0.05, \*\*P < 0.01, \*\*\*P < 0.001 (Student's t-test)

**Figure.2. Exosome-mediated transfer of miR-769-5p is required for GC**

## **cisplatin-resistance and targets CASP9 directly**

A, B. The rates of BGC823 cells' apoptosis were reduced after being co-cultured with BD Exo (200ug/ml) for 24h and treated with cisplatin (0.4 ug/ml) for 24h detected by Hoechst nuclei staining and flow cytometry assay (FCM). C. The survival of BGC823 or SGC7901 cells co-cultured with BD Exo or SD Exo (200ug/ml) for 24h and treated with cisplatin for 24h was detected by CCK-8. D. Red fluorescence was observed in the BGC823 or SGC7901 cells after co-cultured with BGC823/DDP or SGC7901/DDP cells for 24h which were transfected with the Cy3-miR-769-5p mimic (red fluorescence). E. Confocal microscopy showed internalization of exosomes in BGC823 or SGC7901 recipient cells after co-cultured with PKH26-labeled (red fluorescence) BD Exo or SD Exo for 24h. DAPI was used to stain the nuclei of BGC823 or SGC7901 recipient cells with blue fluorescence. F. Predicted binding sites of the CASP9 3' UTR by miR-769-5p. I. Luciferase reporter was carried out in HEK293T cotransduced with miR - 769-5p - mimics or miRNA control with firefly luciferase reporter plasmid containing either wild-type (WT) or mutant (MUT) CASP9 3' UTR (pGL3 - CASP9 - WT or pGL3 - CASP9 - MUT). G, H. PCR and Western blot confirmed that miR-769-5p negatively regulated the expression of CASP9. J. qRT-PCR showed the expression of miR-769-5p in in BGC anti-NC+ PBS, BGC anti-NC + BD Exo and BGC anti-769 + BD Exo. K, L. The mRNA and protein levels of CASP9 in BGC anti-NC+ PBS, BGC anti-NC + BD Exo and BGC anti-769 + BD Exo. M, N. qRT-PCR and Western blot showed the expression of miR-769-5p in BGC+BD Exo DMSO and BGC+BD Exo GW4869. O, P. The upregulation of CASP9

mRNA and protein was detected by qRT-PCR and Western blot in BGC+BD Exo GW4869 and BGC+BD anti-769 Exo. Quantitative data from three independent experiments are shown as the mean  $\pm$  SD (error bars). \*P < 0.05, \*\*P < 0.01, \*\*\*P < 0.001 (Student's t-test)

**Figure.3. Exosome-mediated transfer of miR-769-5p confers cisplatin resistance through downregulating CASP9**

A. Flow cytometry assay detected cell apoptosis rate of BGC anti-NC + PBS, BGC anti-NC + BD Exo, BGC anti-769 + BD Exo and BGC CASP9 + BD Exo. B. Flow cytometry assay detected cell apoptosis rate of BGC+BD Exo DMSO and BGC + BD Exo GW4869. C. Flow cytometry assay detected cell apoptosis rate of BGC + BD anti-NC Exo, BGC + BD anti-769 Exo and BGC + BD anti-769 + siCASP9 Exo. D. The level of  $\gamma$ -H2AX nuclear foci in BGC anti-NC + PBS, BGC anti-NC + BD Exo, BGC anti-769 + BD Exo and BGC CASP9 + BD Exo. E. The level of  $\gamma$ -H2AX nuclear foci in BGC+BD Exo DMSO and BGC+BD Exo GW4869. F. The level of  $\gamma$ -H2AX nuclear foci in BGC+BD anti-NC Exo, BGC + BD anti-769 Exo and BGC + BD anti-769 + siCASP9 Exo. G. TUNEL analysis detected cell apoptosis rate of BGC anti-NC+PBS, BGC anti-NC + BD Exo, BGC anti-769 + BD Exo and BGC CASP9 + BD Exo. Quantitative data from three independent experiments are shown as the mean  $\pm$  SD (error bars). \*P < 0.05, \*\*P < 0.01, \*\*\*P < 0.001 (Student's t-test)

**Figure.4. Exosomal miR-769-5p promotes recipient cells proliferation and migration by downregulating CASP9**

A. TUNEL analysis detected cell apoptosis rate of BGC + BD Exo DMSO and BGC

+ BD Exo GW4869. B. TUNEL analysis detected cell apoptosis rate of BGC + BD anti-NC Exo, BGC + BD anti-769 Exo and BGC + BD anti-769 + siCASP9 Exo. C. The average colony numbers of three independent experiments were calculated in BGC anti-NC + PBS, BGC anti-NC + BD Exo, BGC anti-769 + BD Exo and BGC CASP9 + BD Exo. D. The average colony numbers of three independent experiments were calculated in BGC + BD Exo DMSO and BGC + BD Exo GW4869. E. The average colony numbers of three independent experiments were calculated in BGC + BD anti-NC Exo, BGC + BD anti-769 Exo and BGC + BD anti-769 + siCASP9 Exo. F. Migration ability of BGC anti-NC + PBS, BGC anti-NC + BD Exo, BGC anti-769 + BD Exo and BGC CASP9 + BD Exo were assessed by Transwell assay. G. Migration ability of BGC + BD Exo DMSO and BGC+BD Exo GW4869 were assessed by Transwell assay. H. Migration ability of BGC+BD anti-NC Exo, BGC + BD anti-769 Exo and BGC + BD anti-769 + siCASP9 Exo were assessed by Transwell assay. Quantitative data from three independent experiments are shown as the mean  $\pm$  SD (error bars). \*P < 0.05, \*\*P < 0.01, \*\*\*P < 0.001 (Student' s t-test)

**Figure.5. Exosomal miR-769-5p confers cisplatin resistance through downregulating CASP9 along with subsequent evasion of apoptosis and confirmed in vivo**

Western blot analysis of caspase9, caspase3 and cleaved caspase3 in BGC + BD anti-NC Exo, BGC + BD anti-769 Exo and BGC + BD anti-769 + siCASP9 Exo. B. Western blot analysis of caspase9, caspase3 and cleaved caspase3 in BGC + BD Exo DMSO and BGC + BD Exo GW4869. C. Western blot analysis of caspase9, caspase3



and cleaved caspase3 in BGC + BD anti-NC Exo, BGC + BD anti-769 Exo and BGC + BD anti-769 + siCASP9 Exo. D. Subcutaneous xenograft assay of BGC823 cells with or without BD Exo (200ug/100 $\mu$ L cells per mouse) once every two days in nude mice with PBS or cisplatin (DDP, 4mg/kg) treatment. E. Tumor volume of xenograft models were measured every two days and shown. *Tumor volume (mm<sup>3</sup>) = 0.5  $\times$  width<sup>2</sup>  $\times$  length*. F. Tumor weight of xenograft models were measured every two days and shown. G. CASP9, cleaved caspase3 and p53 expression levels were shown in representative xenograft tumors by Immunohistochemistry (IHC) (400x magnification, scale bars = 50  $\mu$  m). Results are presented as mean SD. \*P < 0.05, \*\*P < 0.01, \*\*\*P < 0.001

**Figure.6. miR-769-5p promotes ubiquitin-mediated p53 protein degradation in GC cells**

A. KEGG enrichment analysis showed that the target genes of differentially expressed miRNAs are enriched in the p53 pathway. B. qPCR detected the expression level of p53 mRNA in BGC NC, BGC mimic-769 and BGC inhibitor-769. C. Western blot analysis of expression level of p53 protein in in BGC NC, BGC mimic-769 and BGC inhibitor-769. D. UbiBrowser website predicted E3 ubiquitination ligase with p53 as a substrate. E. Western blot analysis of p53 protein level of 100ug/ml treated with cycloheximide (CHX) changes with treatment time (0h, 1h, 4h). F. Analysis of p53 protein level by Western blot in BGC nc and BGC inhibitor-769 after treatment of MG-132 (10um) for 6h. G. Western blot analysis of p53 protein expression level after transfection of E3 ubiquitinated ligase specific small interfering RNA (siRNA):

siFBXO11, siMIB2, siMIB1, siITCH and siNEDD4L. H. Co-IP detected the interaction between NEDD4L and p53 in gastric cancer cells. I. Co-IP and western blot detected p53 ubiquitination modification mediated by NEDD4L. J, K. The expression of NEDD4L and p53 protein levels when miR-769-5p is knocked down or overexpressed. L, M. PCR and Western blot verified the negatively regulatory effects of miR-769-5p on RNF20. N. Predicted binding sites of the RNF20 3' UTR by miR-769-5p. O. Luciferase reporter was carried out in HEK293T cotransduced with miR-769-5p-mimics or miRNA control with pGL3-RNF20-WT or pGL3-RNF20-MUT. Quantitative data from three independent experiments are shown as the mean  $\pm$  SD (error bars). \*P < 0.05, \*\*P < 0.01, \*\*\*P < 0.001 (Student' s t-test)

**Figure.7. E3 ubiquitination ligase RNF20 participates in miR-769-5p mediated p53 protein ubiquitination in GC cells**

A. TUNEL analysis detected cell apoptosis rate of BGC NC, BGC HA-RNF20 and BGC si-RNF20. B. The level of  $\gamma$ -H2AX nuclear foci in BGC NC, BGC HA-RNF20 and BGC si-RNF20. C. The western blot analysis of Bax, Bcl-2 and cleaved caspase 3 proved the positive mediation of RNF20 on apoptosis. D, E, F. The recovery proved that miR-769-5p inhibits the process of apoptosis by down-regulating RNF20 by analysis of TUNEL and western blot. G, H. Flow cytometry assay proved that miR-769-5p inhibits the process of apoptosis by down-regulating RNF20. I. The protein levels of NEDD4L and p53 when RNF20 overexpression and knockdown. J. Co-immunoprecipitation proves that NEDD4L interacts with RNF20. K, L.

Co-immunoprecipitation proves that the ubiquitination modification of NEDD4L is mediated by RNF20. Quantitative data from three independent experiments are shown as the mean  $\pm$  SD (error bars). \*P < 0.05, \*\*P < 0.01, \*\*\*P < 0.001 (Student's t-test)

**Figure.8. Exosomal miR-769-5p induces cisplatin resistance and promotes the tumorigenesis of GC in vivo**

A. Subcutaneous xenograft assay of BGC823/DDP cells ( $5 \times 10^6$  cells/100 $\mu$ L) with or without miR-769-5p knockdown in nude mice with PBS or cisplatin (DDP, 4mg/kg) treatment. B. Tumor volume of xenograft models were measured every two days and shown. C. Tumor weight of xenograft models were measured every two days and shown. D. Levels of exosomal miR-769-5p in the serum were detected by qPCR. E. CASP9, cleaved caspase3 and p53 expression levels were shown in representative xenograft tumors by Immunohistochemistry (IHC) (400x magnification, scale bars = 50  $\mu$  m). F. Subcutaneous xenograft assay of BGC823 cells ( $5 \times 10^6$  cells/100 $\mu$ L) with or without miR-769-5p overexpressed in nude mice with PBS or cisplatin (DDP, 4mg/kg) treatment. G. Tumor volume of xenograft models were measured every two days and shown. H. Tumor weight of xenograft models were measured every two days and shown. I. Levels of exosomal miR-769-5p in the serum were detected by qPCR. J. CASP9, cleaved caspase3 and p53 expression levels were shown in representative xenograft tumors by Immunohistochemistry (IHC) (400x magnification, scale bars = 50  $\mu$  m). K. Summary of the mechanism by which exosomal miR-769-5p induces cisplatin resistance. Results are presented as mean SD. \*P < 0.05,

**\*\*P < 0.01, \*\*\*P < 0.001**

**Figure.S1.** A. 5 most upregulated and downregulated miRNAs (hsa-miR-769-5p, hsa-miR-30a-5p, hsa-miR-365b-3p, hsa-miR-21-3p, hsa-miR-193b-5p) were selected based on the fold change and p value according to the result of differences in miRNAs expressed in two cell-derived exosome populations by using sequencing analysis. B. qPCR of miR-365-3p and miR-769-5p expression in exosomes released by BGC823, BGC823/DDP, SGC7901, SGC7901/DDP and found that the miR-769-5p expression was markedly higher in BD Exo and SD Exo. C. TCGA showed the expression of 4 miRNAs (hsa-miR-30a-5p, hsa-miR-365b-3p, hsa-miR-21-3p, hsa-miR-193b-5p) excluding miR-769-5p in GC and adjacent normal. D. IC50 of BGC823, BGC823/DDP, SGC7901, SGC7901/DDP cell lines. E. (related to Figure.2L), G. (related to Figure.2K) The mRNA and protein levels of CASP9 in SGC anti-NC+ PBS, SGC anti-NC + SD Exo and SGC anti-769 + SD Exo. F. (related to Figure.2J) qRT-PCR showed the expression of miR-769-5p in in SGC anti-NC + PBS, SGC anti-NC + SD Exo and SGC anti-769 + SD Exo. H. (related to Figure.2N), I. (related to Figure.2M) RT-PCR and Western blot showed the expression of miR-769-5p in SGC + SD Exo DMSO and SGC + SD Exo GW4869. J. (related to Figure.2O), K. (related to Figure.2P) The upregulation of CASP9 mRNA and protein was detected by qRT-PCR and Western blot in SGC + SD Exo GW4869 compared to SGC + SD anti-769 Exo. Quantitative data from three independent experiments are shown as the mean  $\pm$  SD (error bars). \*P < 0.05, \*\*P < 0.01, \*\*\*P < 0.001 (Student' s t-test)

**Figure.S2.** A. (related to Figure.3A) Flow cytometry assay detected cell apoptosis rate of SGC anti-NC + PBS, SGC anti-NC + SD Exo, SGC anti-769 + SD Exo and SGC CASP9 + SD Exo. B. (related to Figure.3B) Flow cytometry assay detected cell apoptosis rate of SGC + SD Exo DMSO and SGC + SD Exo GW4869. C. (related to Figure.3C) Flow cytometry assay detected cell apoptosis rate of SGC + SD anti-NC Exo, SGC + SD anti-769 Exo and SGC + SD anti-769 + siCASP9 Exo. D. (related to Figure.4C) The average colony numbers of three independent experiments were calculated in SGC anti-NC + PBS, SGC anti-NC + SD Exo, SGC anti-769 + SD Exo and SGCCASP9 + SD Exo. E. (related to Figure.4D) The average colony numbers of three independent experiments were calculated in BGC + SD Exo DMSO and BGC + SD Exo GW4869. F. (related to Figure.4E) The average colony numbers of three independent experiments were calculated in BGC + SD anti-NC Exo, BGC + SD anti-769 Exo and BGC + SD anti-769 + siCASP9 Exo. G. (related to Figure.4F) Migration and invasion ability of SGC anti-NC + PBS, SGC anti-NC+SD Exo, SGC anti-769+ SD Exo and SGCCASP9 + SD Exo were assessed by Transwell assay. H. (related to Figure.4G) Migration and invasion ability of BGC + SD Exo DMSO and BGC + SD Exo GW4869 were assessed by Transwell assay. I. (related to Figure.4H) Migration and invasion ability of BGC + SD anti-NC Exo, BGC + SD anti-769 Exo and BGC + SD anti-769 + siCASP9 Exo were assessed by Transwell assay. Quantitative data from three independent experiments are shown as the mean  $\pm$  SD (error bars). \*P < 0.05, \*\*P < 0.01, \*\*\*P < 0.001 (Student's t-test)

**Figure.S3.** A. (related to Figure.3D) The level of  $\gamma$ -H2AX nuclear foci in SGC

anti-NC + PBS, SGC anti-NC + SD Exo, SGC anti-769 + SD Exo and SGC CASP9+ SD Exo. B. (related to Figure.3E) The level of  $\gamma$ -H2AX nuclear foci in SGC + SD Exo DMSO and SGC + SD Exo GW4869. C. (related to Figure.3F) The level of  $\gamma$ -H2AX nuclear foci in SGC + SD anti-NC Exo, SGC + SD anti-769 Exo and SGC + SD anti-769 + siCASP9 Exo. D. (related to Figure.3G) TUNEL analysis detected cell apoptosis rate of SGC anti-NC + PBS, SGC anti-NC + SD Exo, SGC anti-769 + SD Exo and SGC CASP9 + SD Exo. E. (related to Figure.4A) TUNEL analysis detected cell apoptosis rate of BGC + SD Exo DMSO and BGC + SD Exo GW4869. F. (related to Figure.4B) TUNEL analysis detected cell apoptosis rate of BGC + SD anti-NC Exo, BGC + SD anti-769 Exo and BGC + SD anti-769 + siCASP9 Exo. Quantitative data from three independent experiments are shown as the mean  $\pm$  SD (error bars). \*P < 0.05, \*\*P < 0.01, \*\*\*P < 0.001 (Student's t-test)

**Figure.S4.** A. (related to Figure.5A) Western blot analysis of caspase9, caspase3 and cleaved caspase3 in SGC + SD anti-NC Exo, SGC + SD anti-769 Exo and SGC + SD anti-769 + siCASP9 Exo. B. (related to Figure.5B) Western blot analysis of caspase9, caspase3 and cleaved caspase3 in SGC + SD Exo DMSO and SGC + SD Exo GW4869. C. (related to Figure.5C) Western blot analysis of caspase9, caspase3 and cleaved caspase3 in SGC + SD anti-NC Exo, SGC + SD anti-769 Exo and SGC +SD anti-769+siCASP9 Exo. D. (related to Figure.6E) Western blot analysis of p53 protein level of 100ug/ml treated with cycloheximide (CHX) changes with treatment time. E. (related to Figure.6F)Western blot analysis of p53 protein level after MG-132 (10um) treatment. F. (related to Figure.6H) Co-IP detected the interaction

between NEDD4L and p53 in SGC cells. I. Co-IP and western blot detected. G. (related to Figure.6I) p53 ubiquitination modification mediated by NEDD4L. H. (related to Figure.6J), I. (related to Figure.6K) The expression of NEDD4L and p53 protein levels when miR-769-5p is knocked down or overexpressed. Quantitative data from three independent experiments are shown as the mean  $\pm$  SD (error bars). \*P < 0.05, \*\*P < 0.01, \*\*\*P < 0.001 (Student's t-test)

**Figure.S5.** A. (related to Figure.7A) TUNEL analysis detected cell apoptosis rate of SGC NC, SGC HA-RNF20 and SGC si-RNF20. B. (related to Figure.7B) The level of  $\gamma$ -H2AX nuclear foci in SGC NC, SGC HA-RNF20 and SGC si-RNF20. C (related to Figure.7D), D (related to Figure.7E). The recovery proved that miR-769-5p inhibits the process of apoptosis by down-regulating RNF20 by analysis of TUNEL. Quantitative data from three independent experiments are shown as the mean  $\pm$  SD (error bars). \*P < 0.05, \*\*P < 0.01, \*\*\*P < 0.001 (Student's t-test)

**Figure.S6.** A. (related to Figure.7C), B (related to Figure.7F) The western blot analysis of Bax, Bcl-2 and cleaved caspase 3 proved the mediation of RNF20 on apoptosis. C. (related to Figure.7G) The protein levels of NEDD4L and p53 when RNF20 overexpression and knockdown. D. (related to Figure.7I) Co-IP proved that NEDD4L interacts with RNF20. E. (related to Figure.7J), F (related to Figure.7K) Co-IP proved that the ubiquitination modification of NEDD4L is mediated by RNF20. Quantitative data from three independent experiments are shown as the mean  $\pm$  SD (error bars). \*P < 0.05, \*\*P < 0.01, \*\*\*P < 0.001 (Student's t-test)





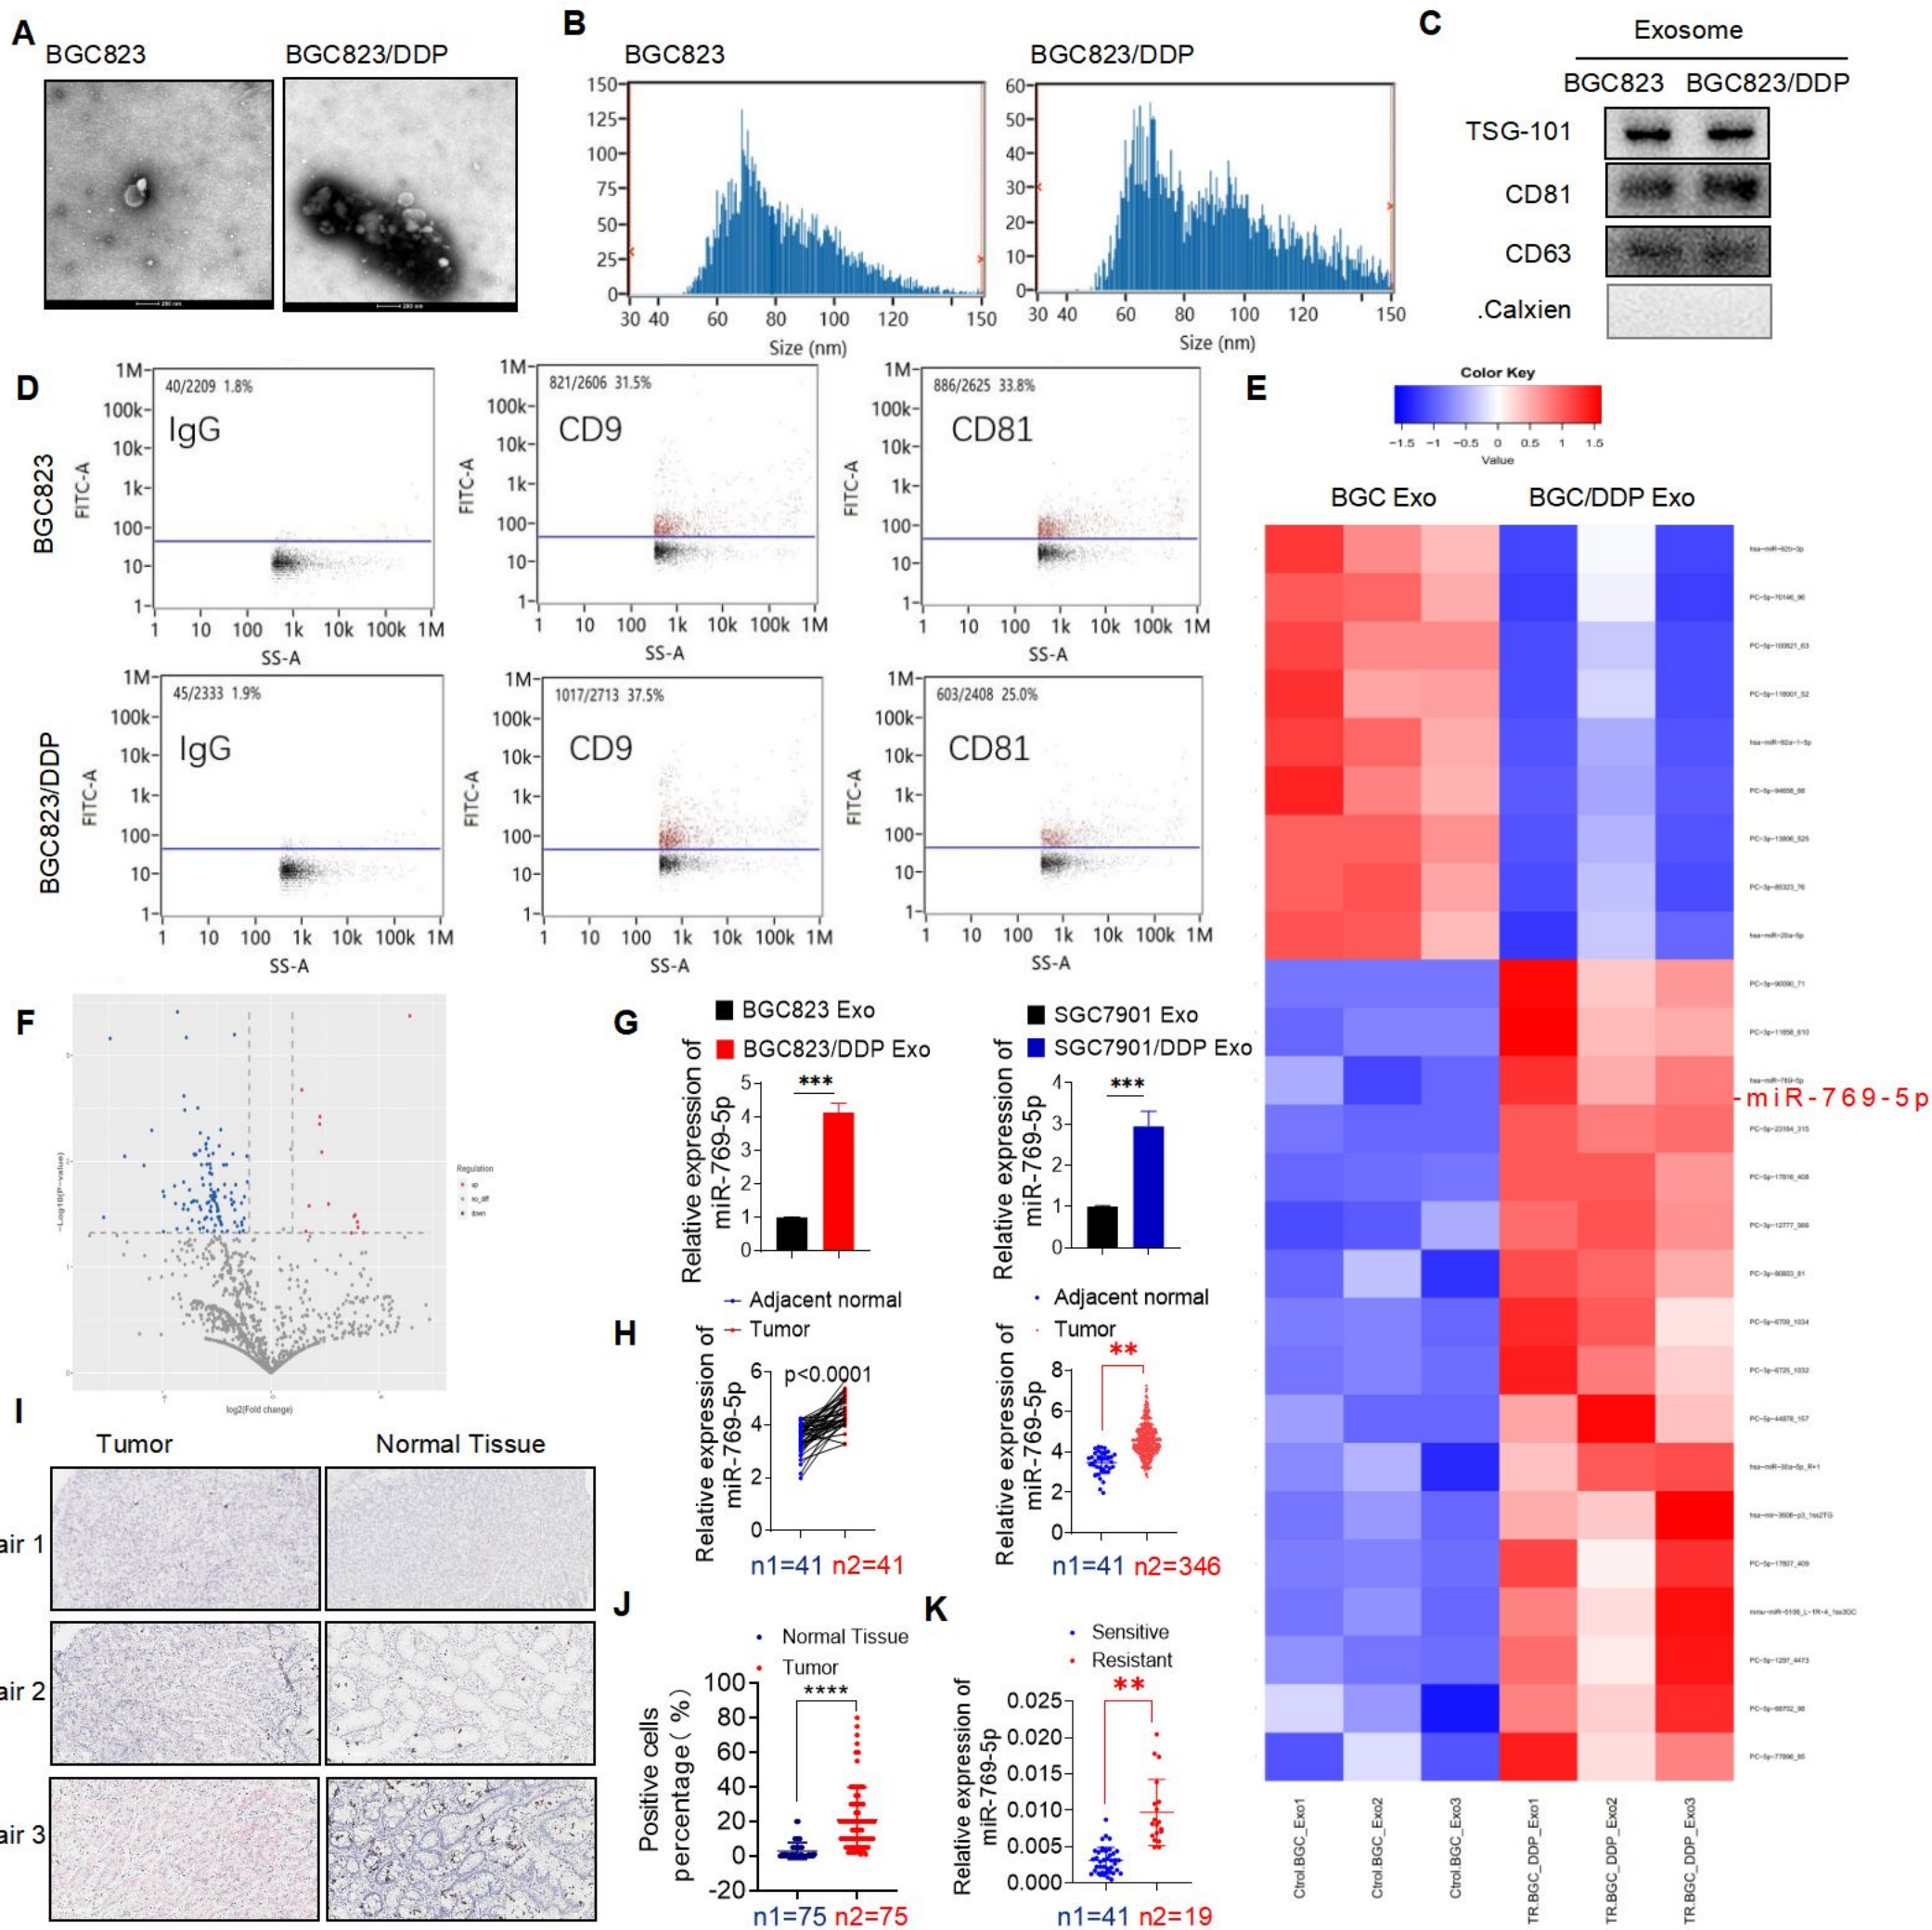

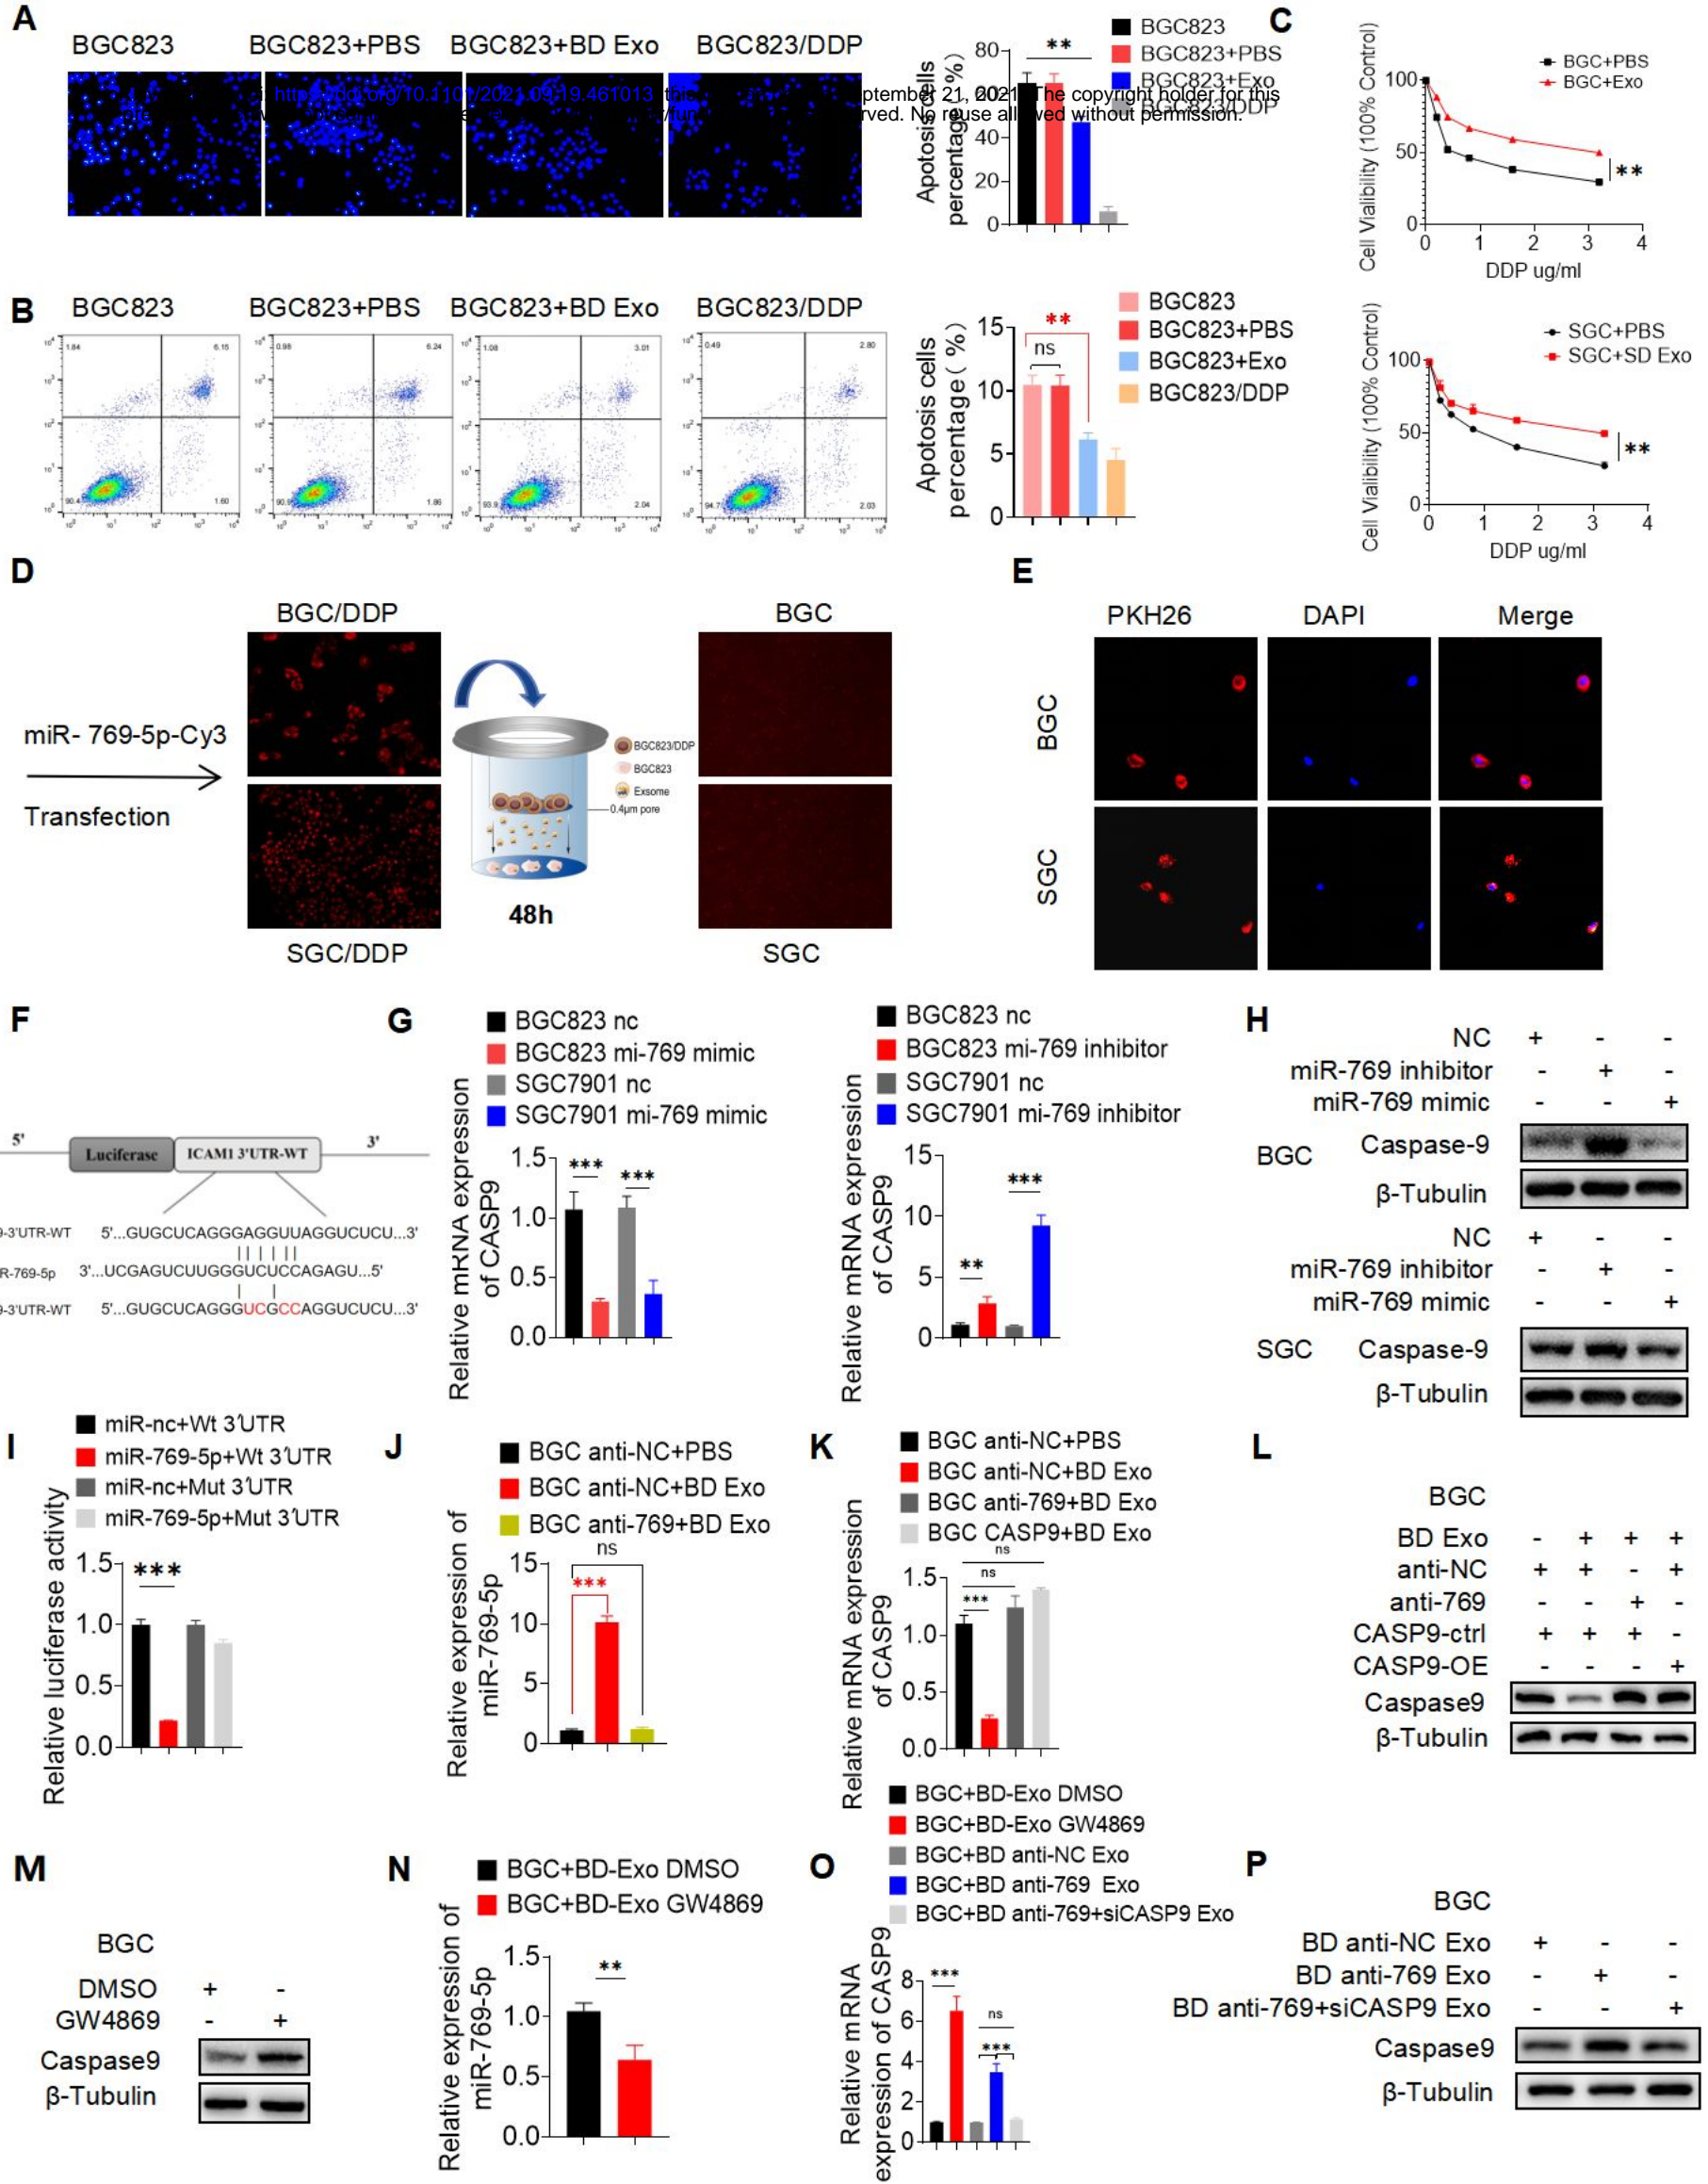

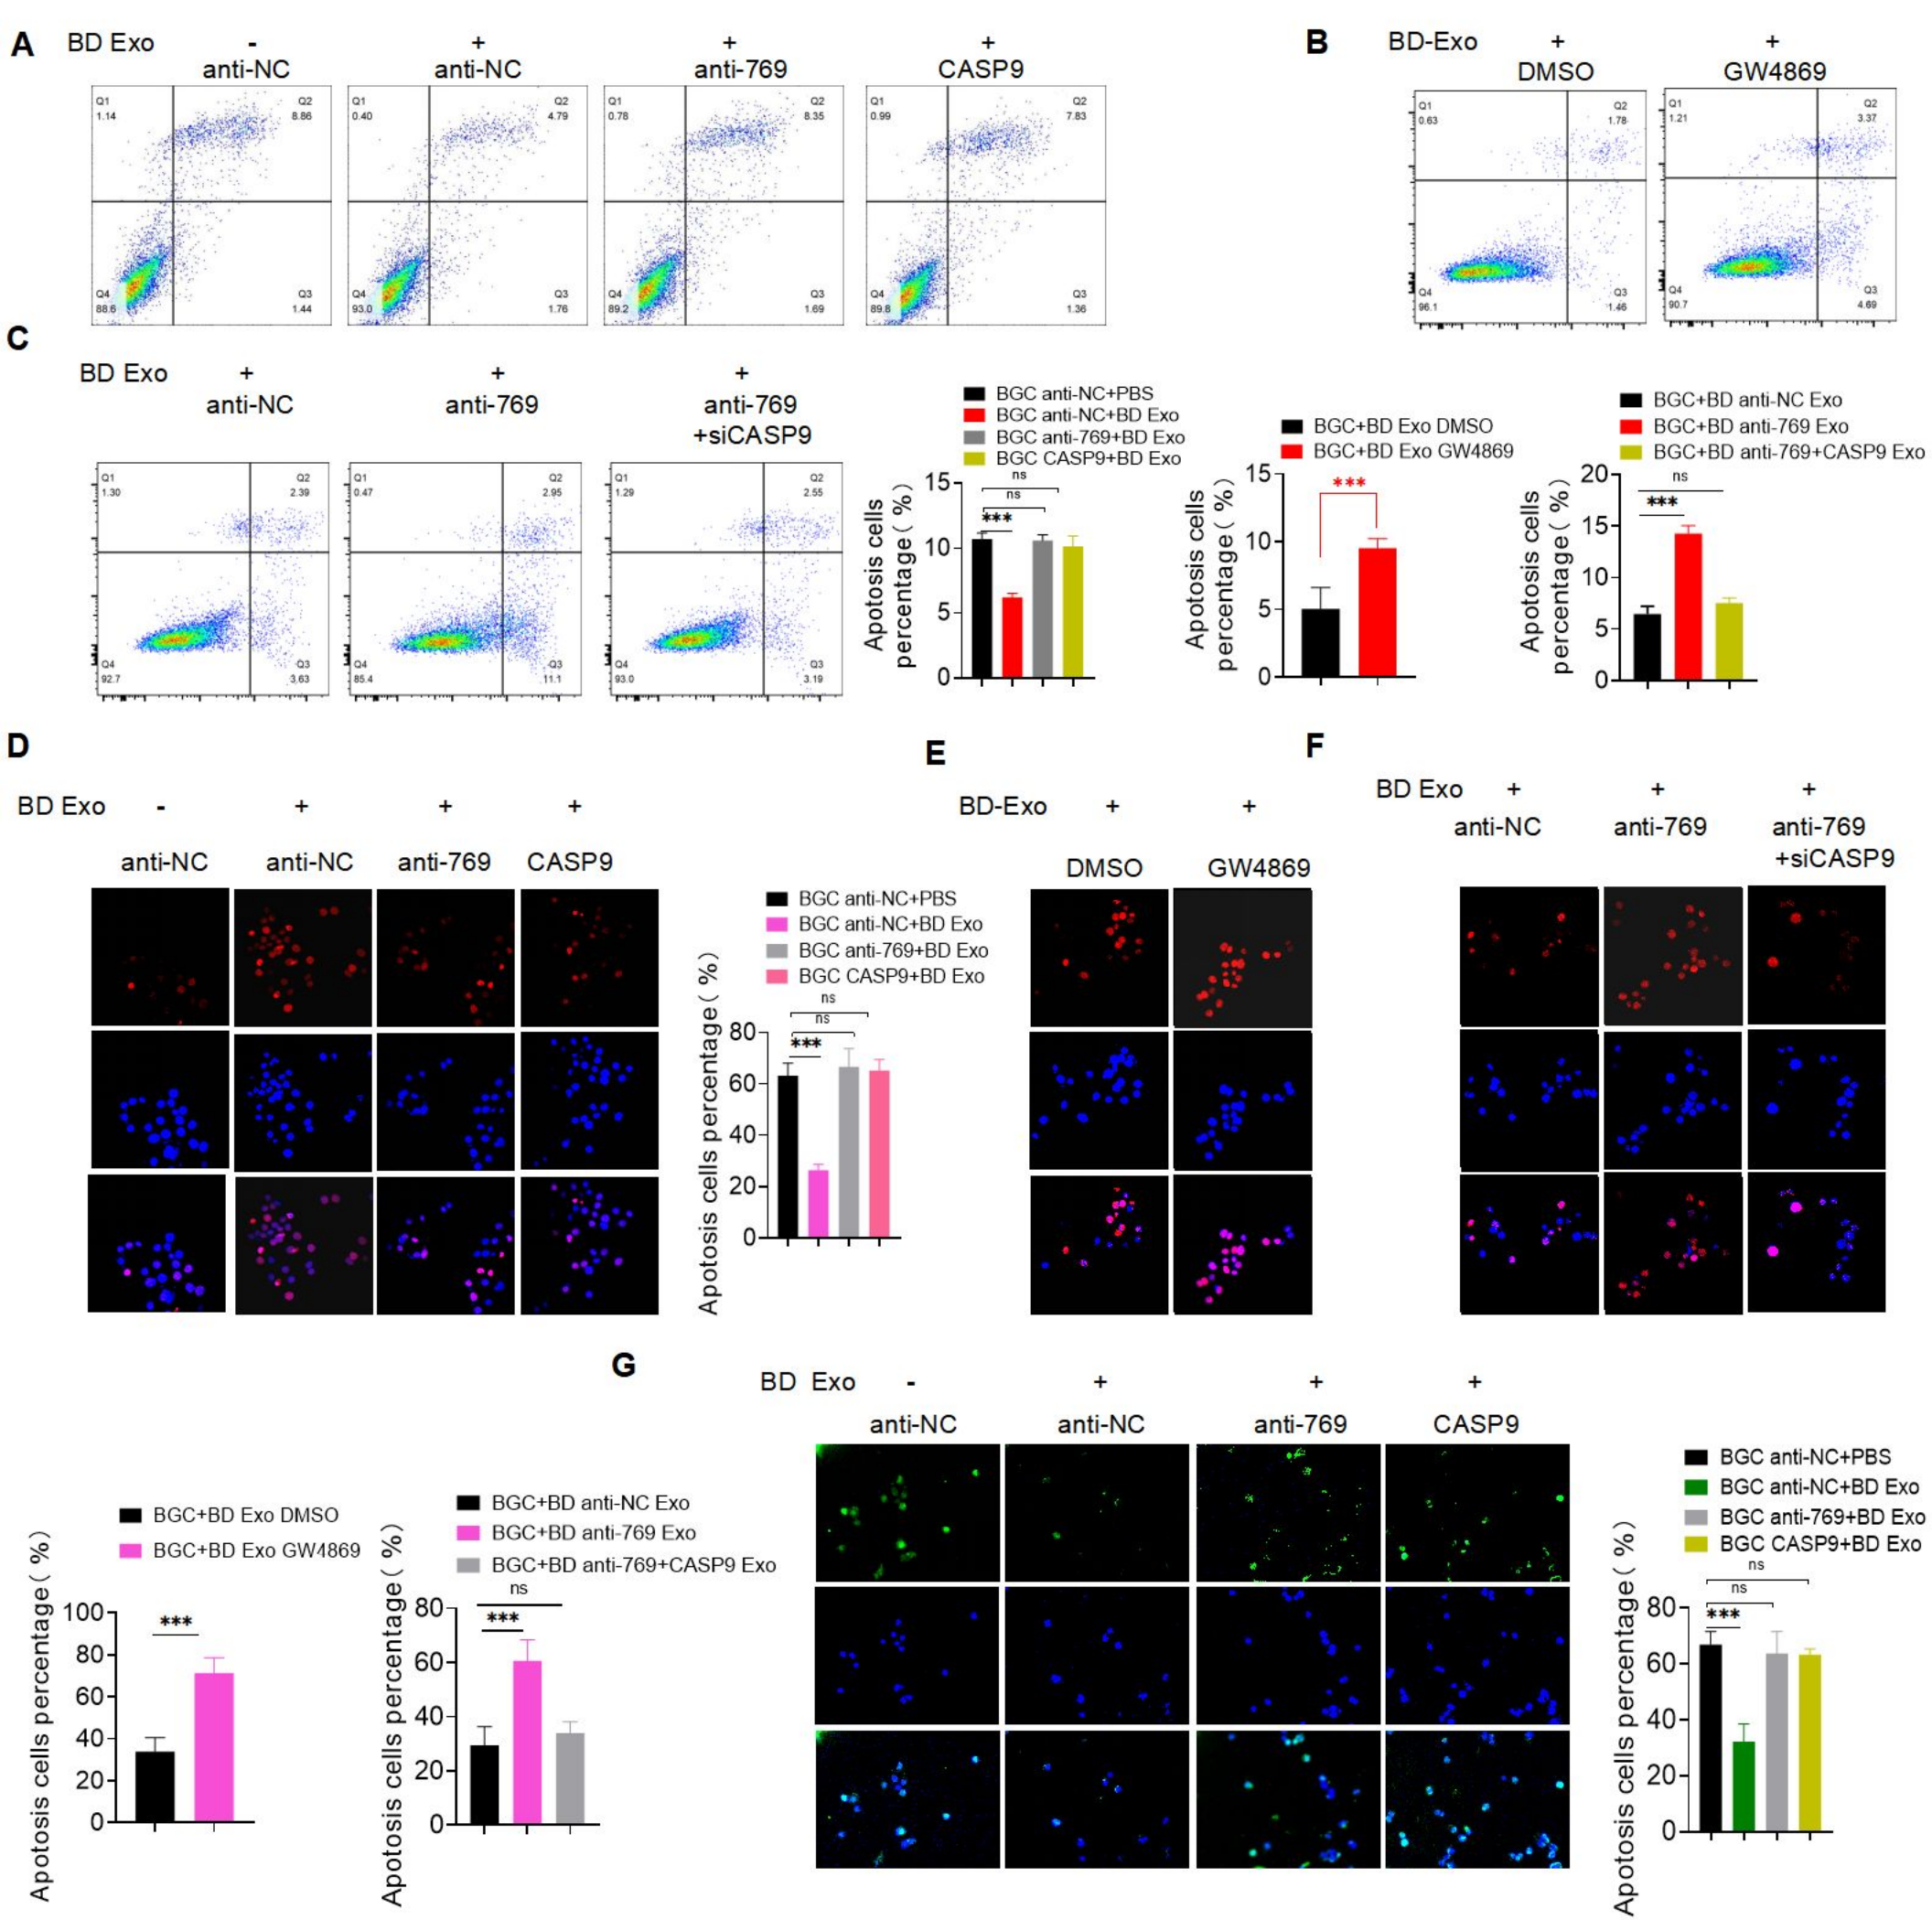

BD-Exo + +

BD Exo + + +

anti-NC

anti-769

anti-769  
+siCASP9**A**

DMSO

GW4869

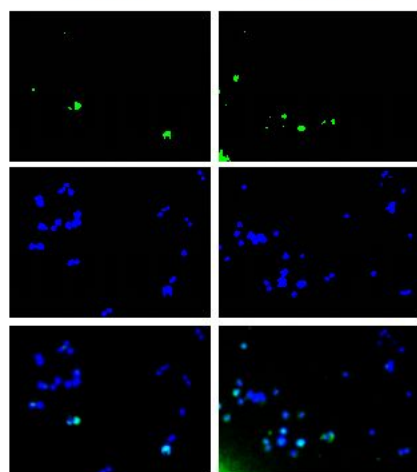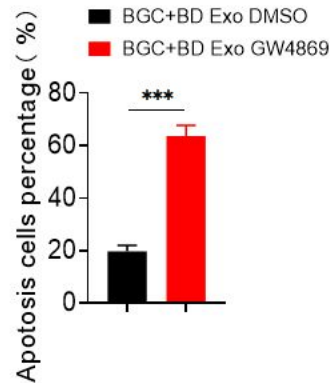**B**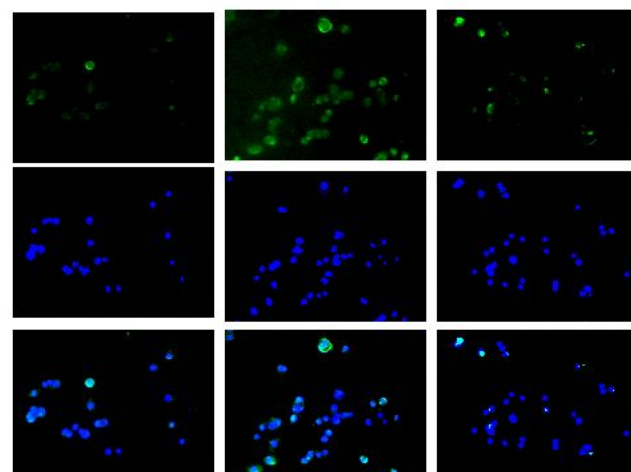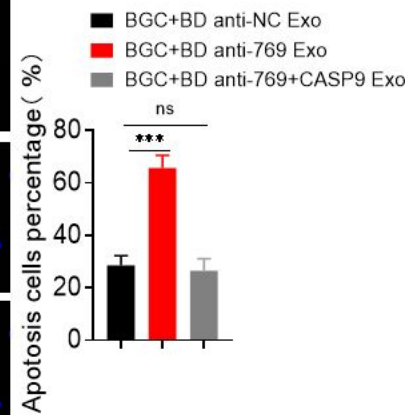**C**BD Exo - + + +  
anti-NC anti-NC anti-769 CASP9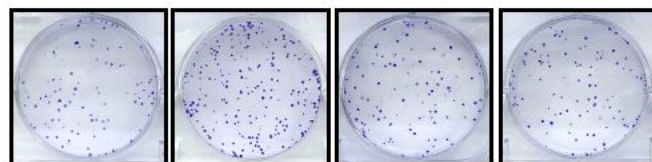

■ BGC anti-NC+PBS  
■ BGC anti-NC+BD Exo  
■ BGC anti-769+BD Exo  
■ BGC CASP9+BD Exo

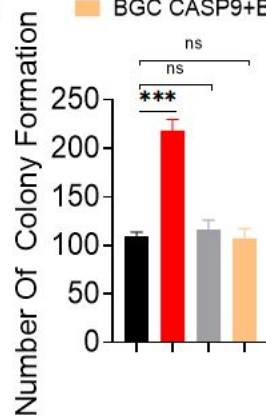**D**BD-Exo + +  
DMSO GW4869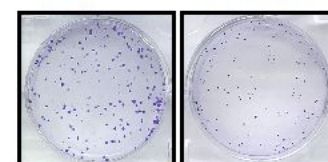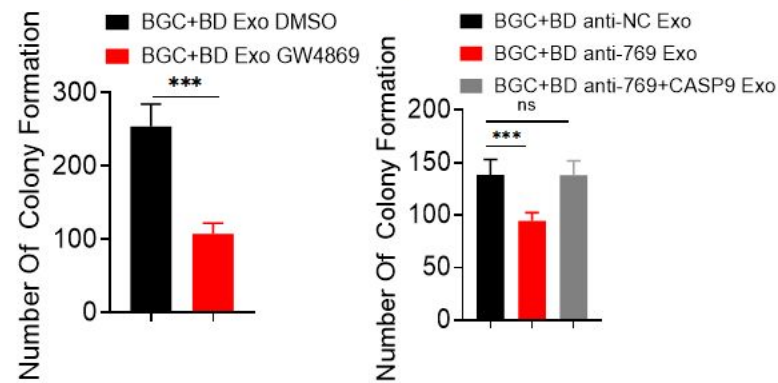**E**BD Exo + + +  
anti-NC anti-769 anti-769  
+siCASP9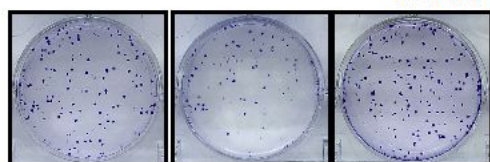**F**BD Exo - + + +  
anti-NC anti-NC anti-769 CASP9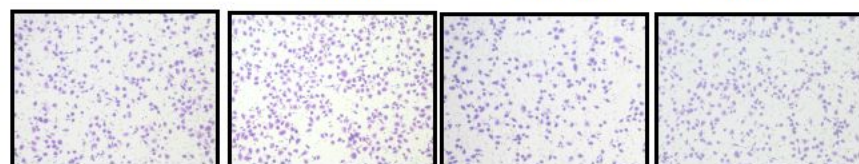

■ BGC anti-NC+PBS  
■ BGC anti-NC+BD Exo  
■ BGC anti-769+BD Exo  
■ BGC CASP9+BD Exo

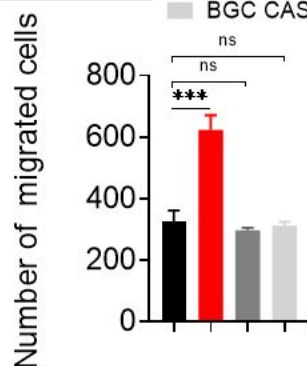**G**BD Exo + +  
DMSO GW4869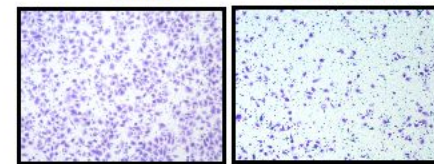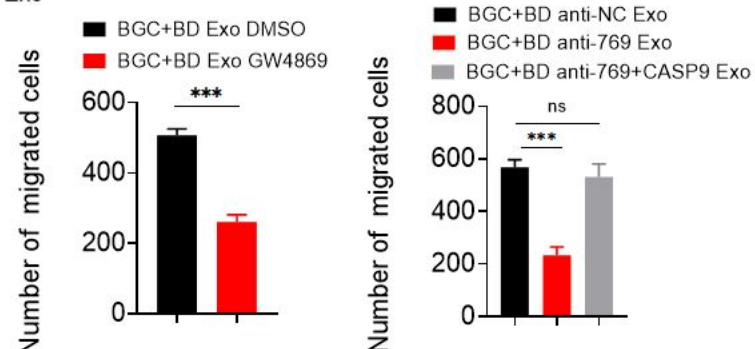**H**BD Exo + + +  
anti-NC anti-769 anti-769  
+siCASP9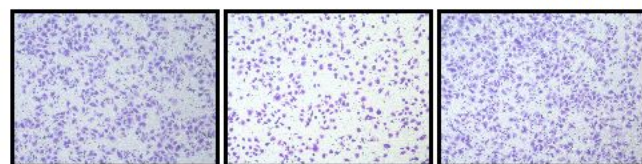

**A**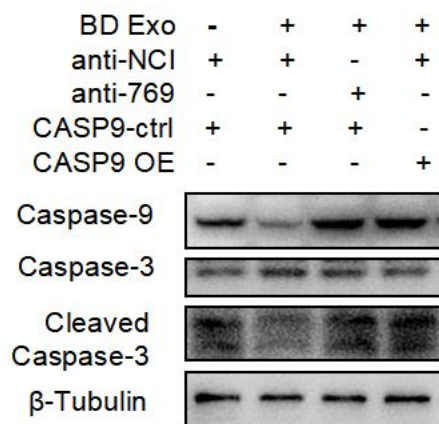**B**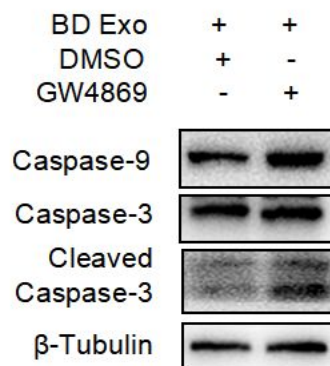**C**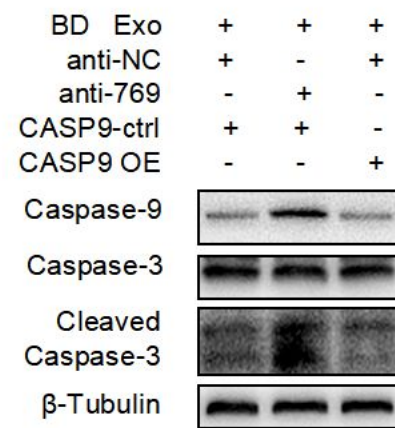**D**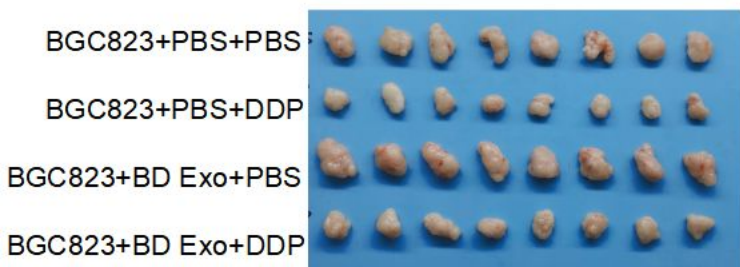**E**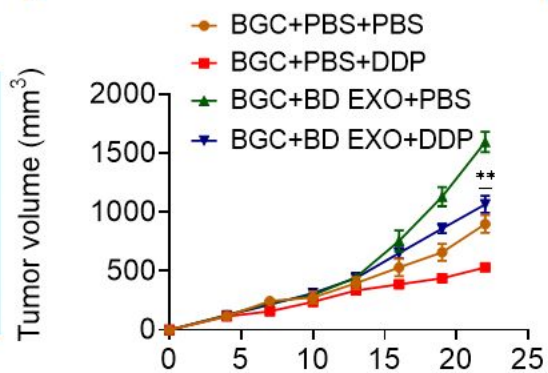**F**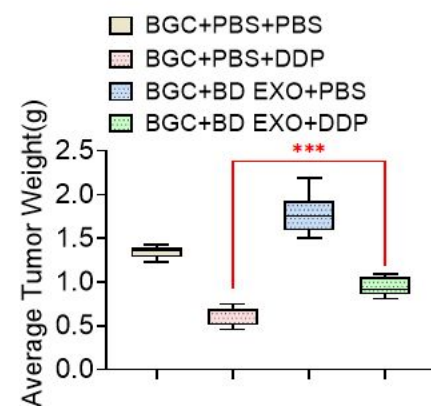**G**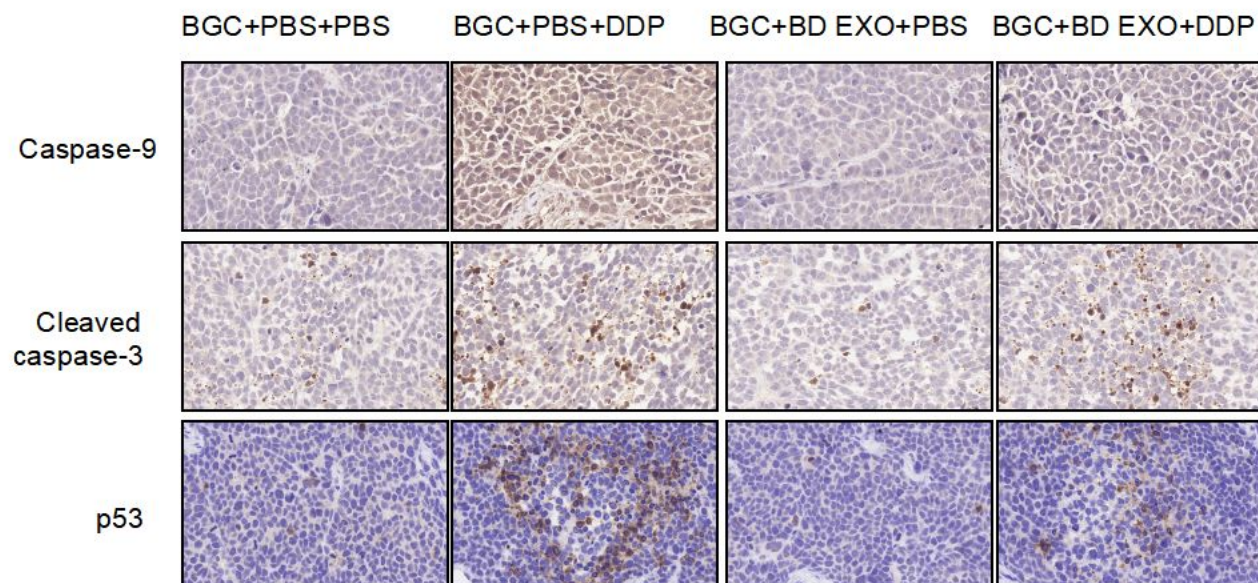

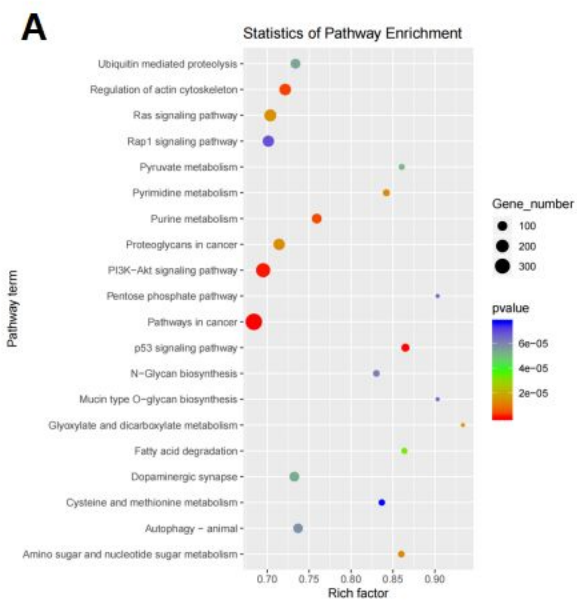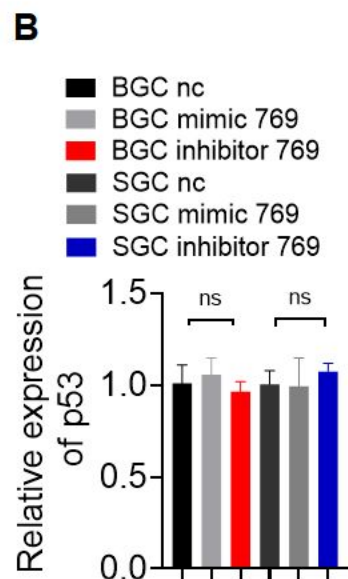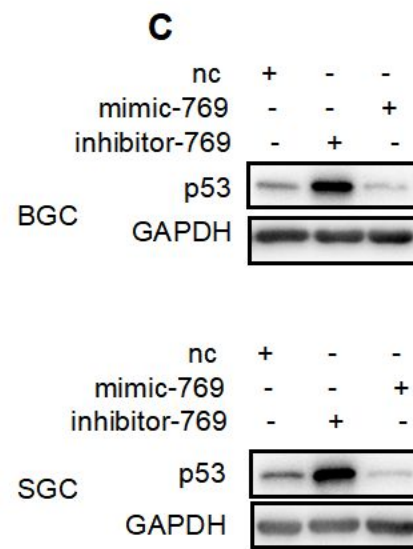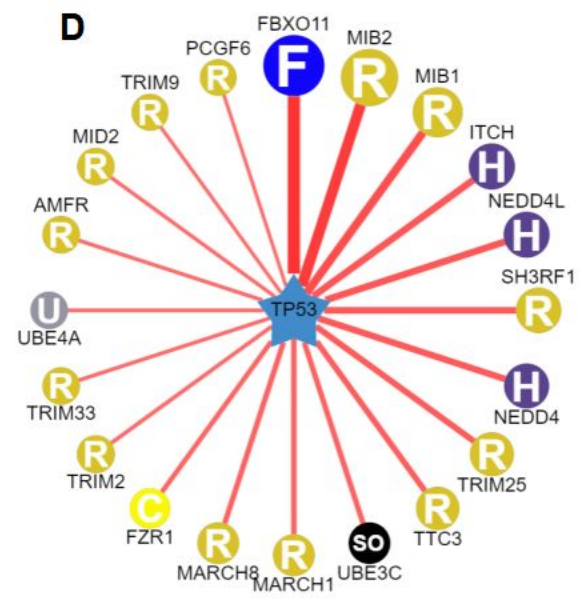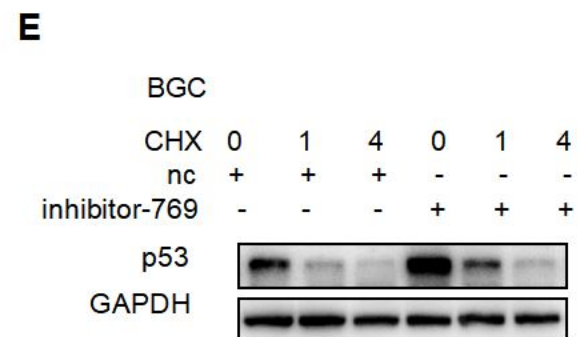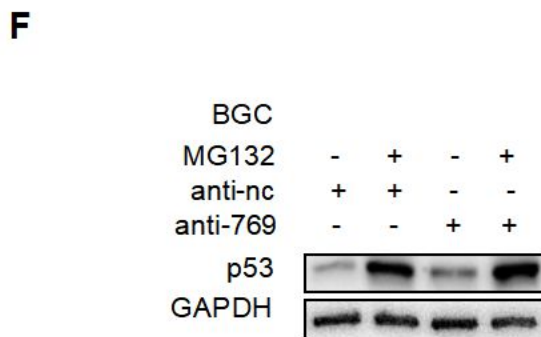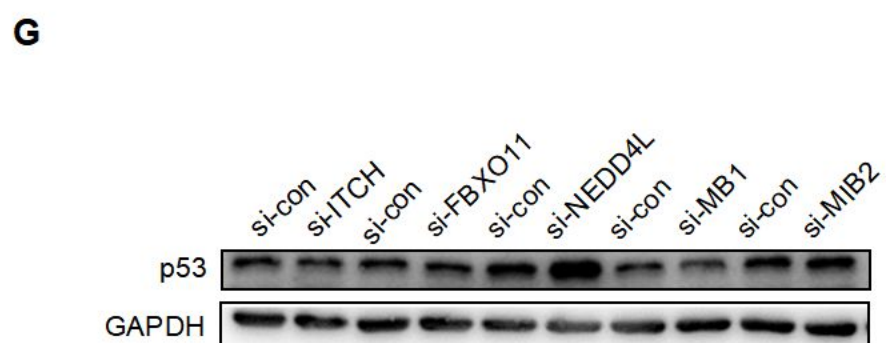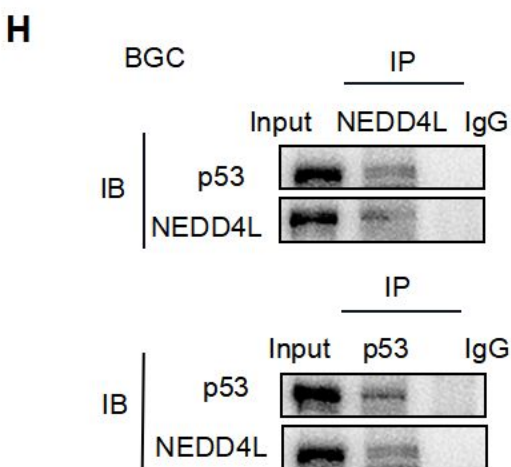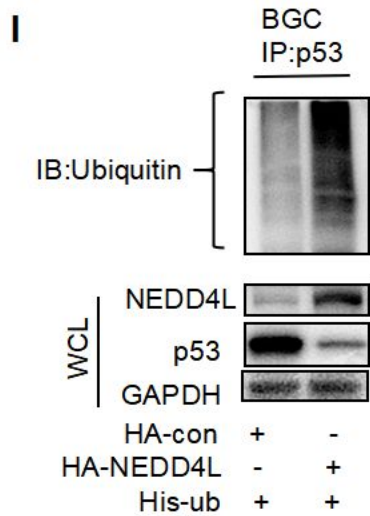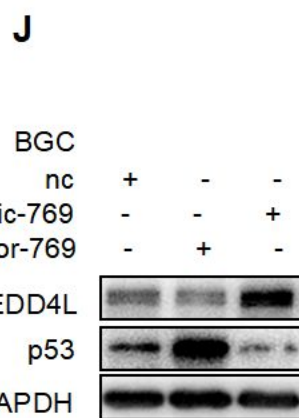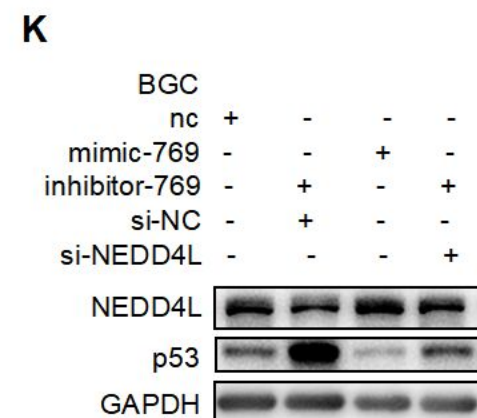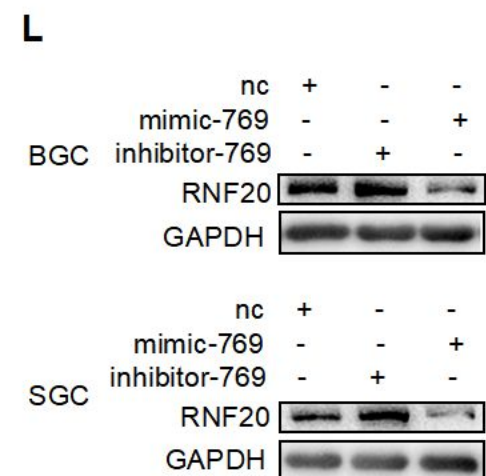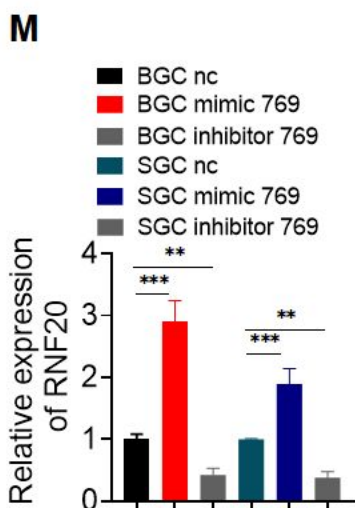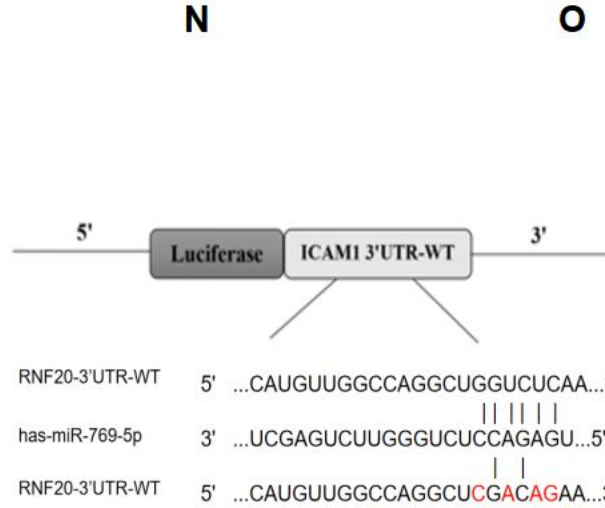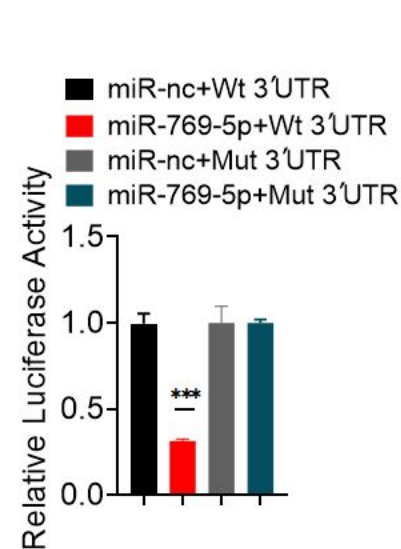

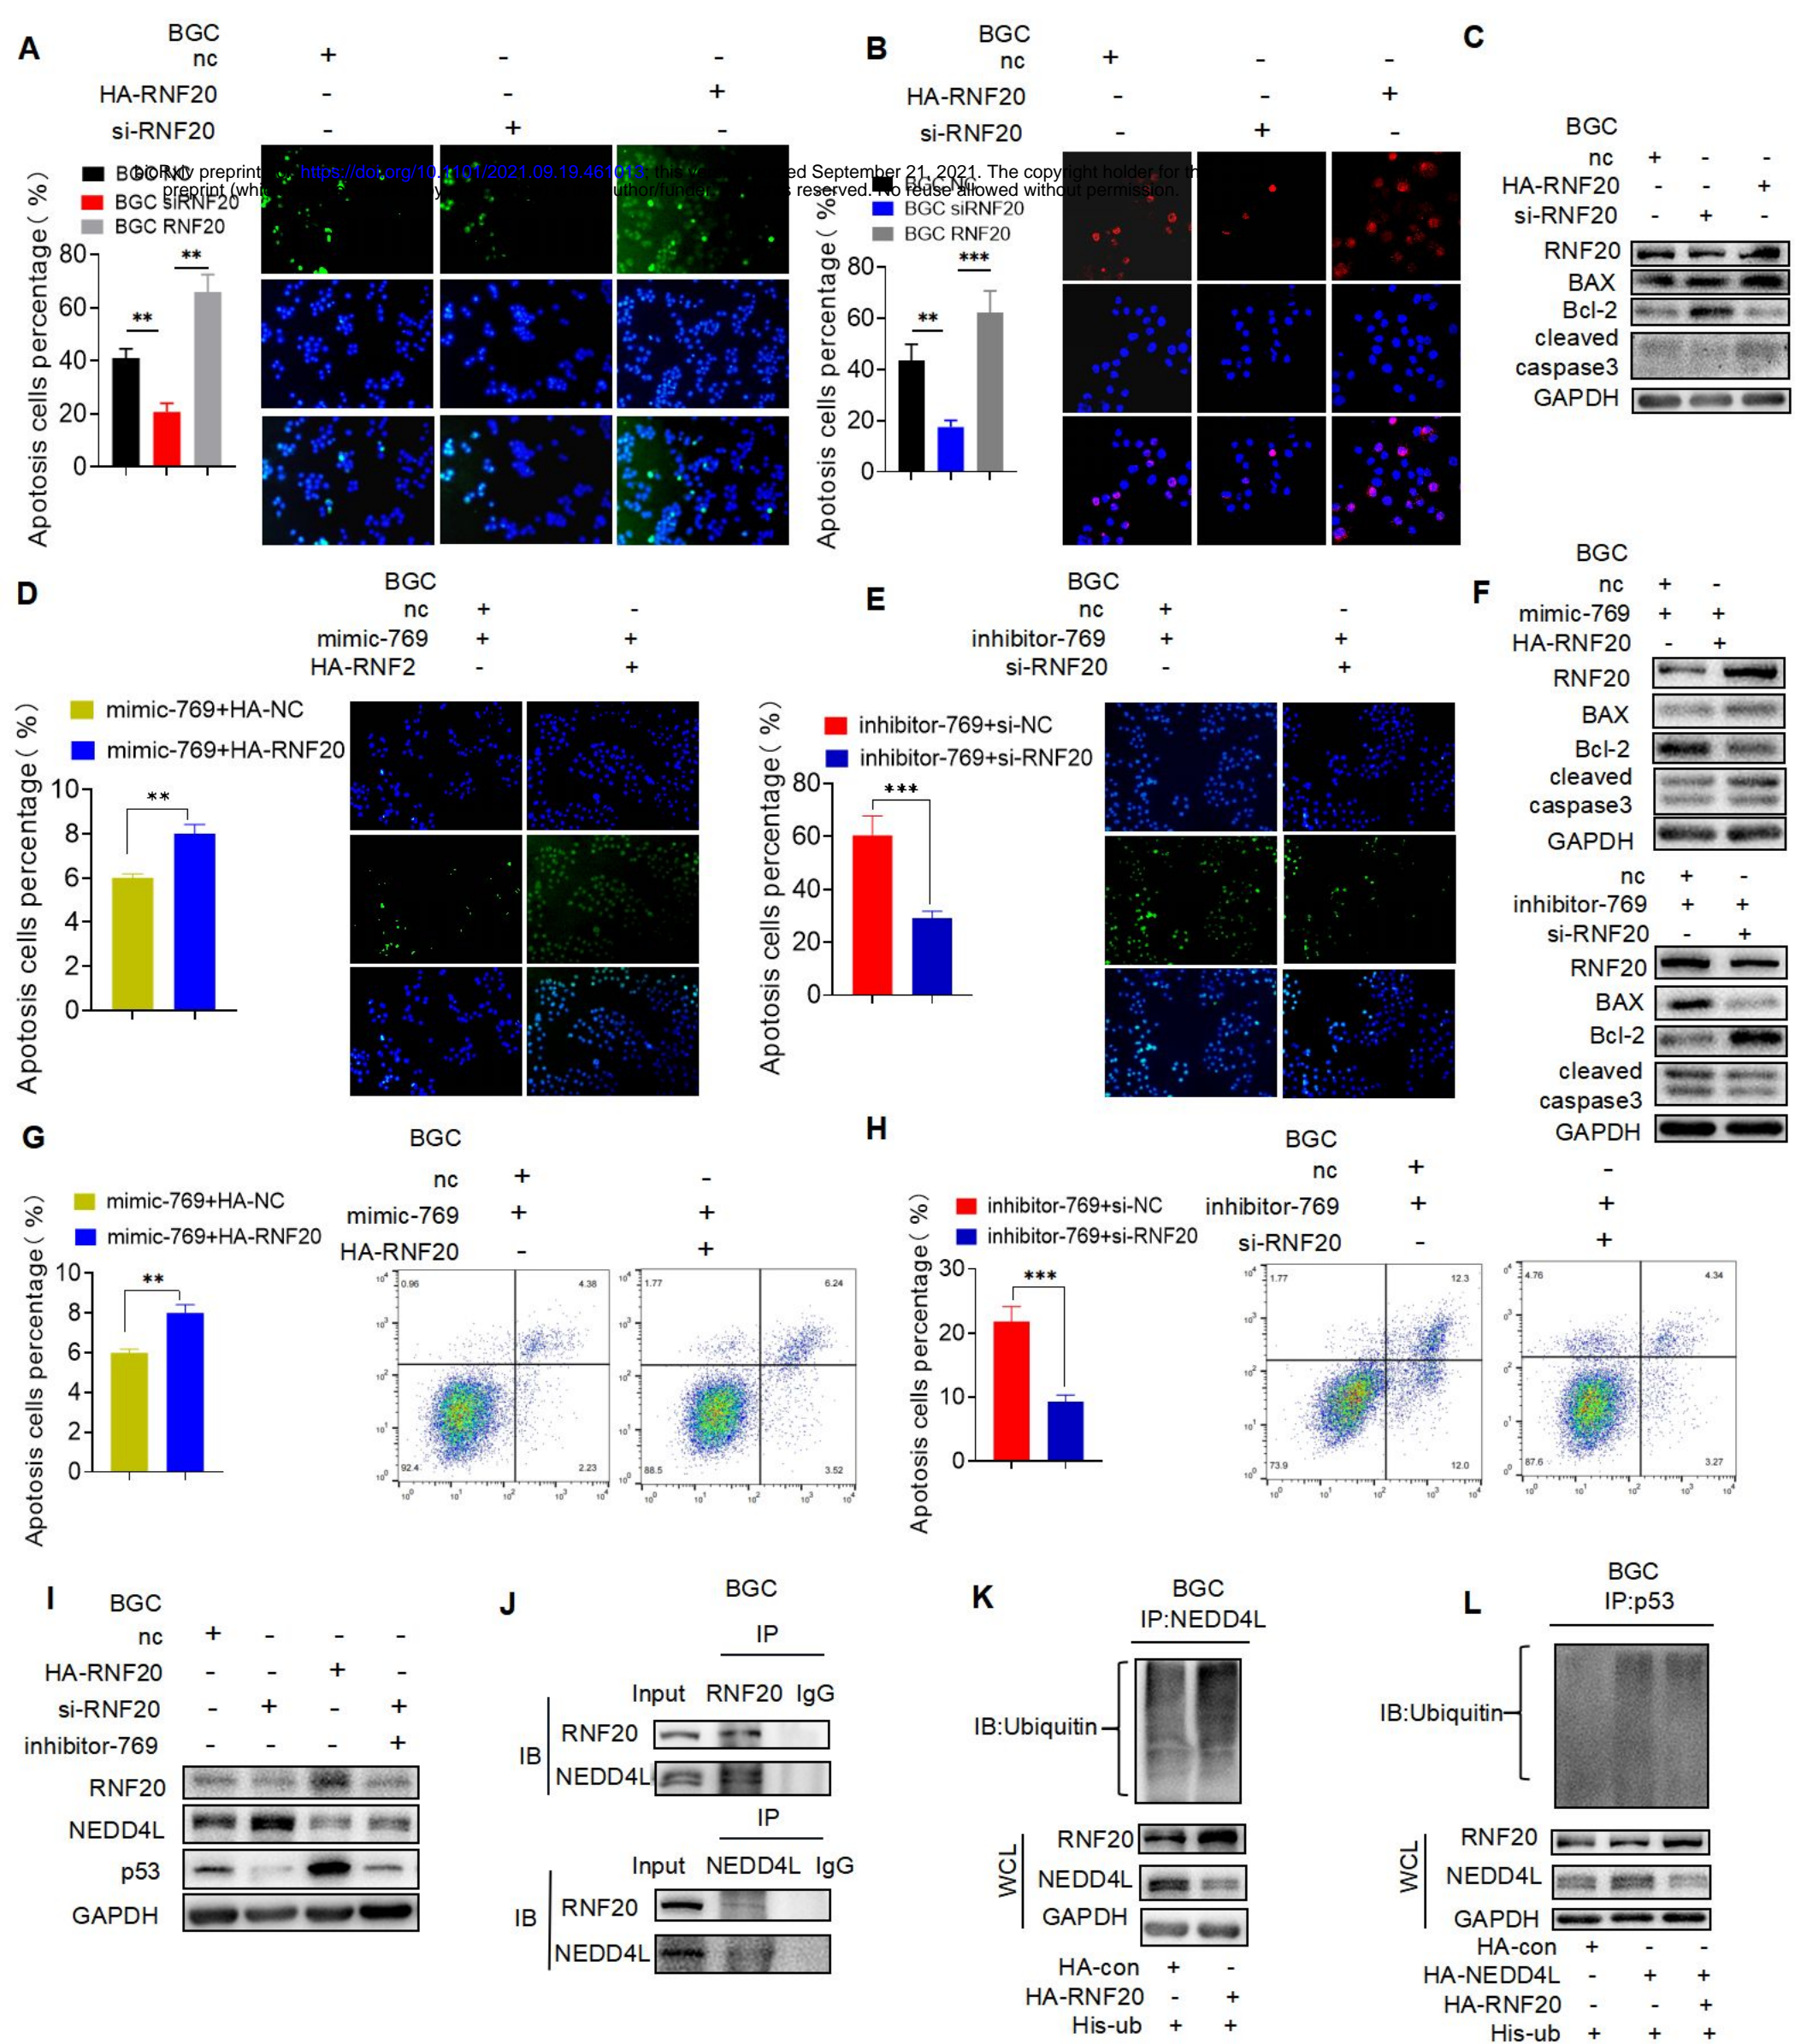

**A**

BGC/DDP anti-NC + PBS  
 BGC/DDP anti769 + PBS  
 BGC/DDP anti-NC +DDP  
 BGC/DDP anti-769+DDP

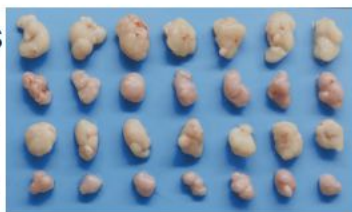**B**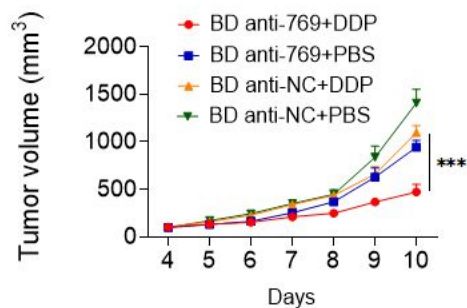**C**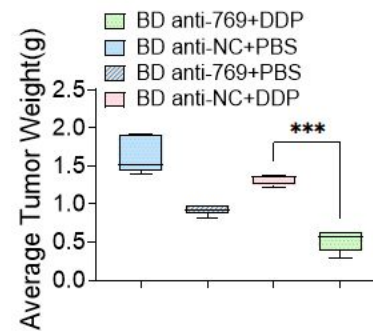**D**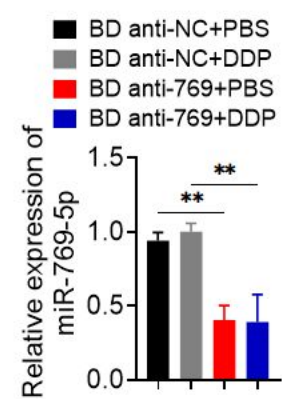**E**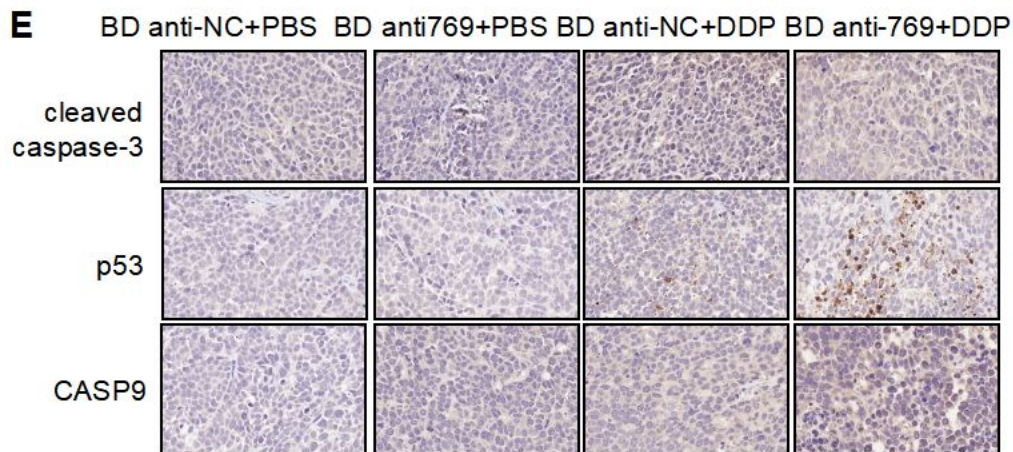**F**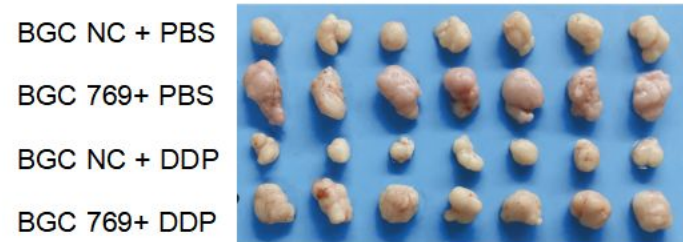**K**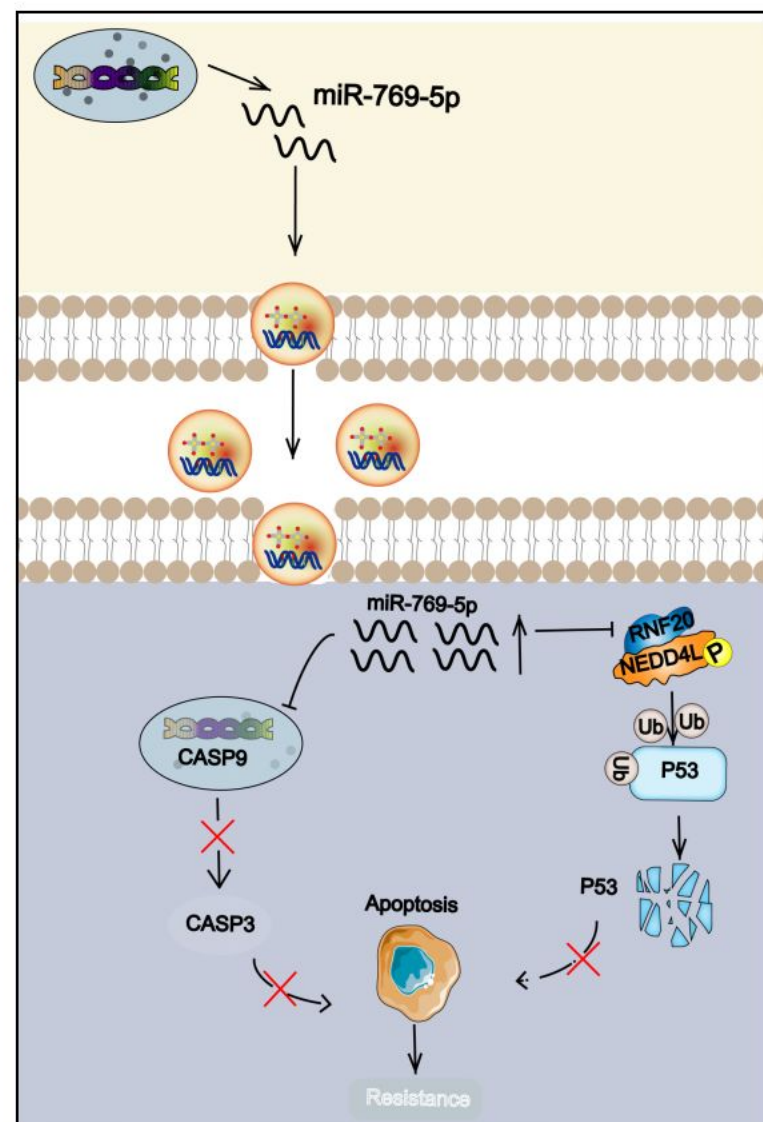**G**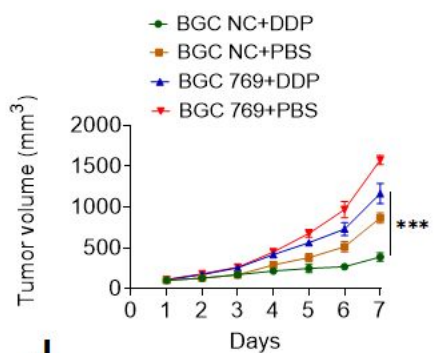**H**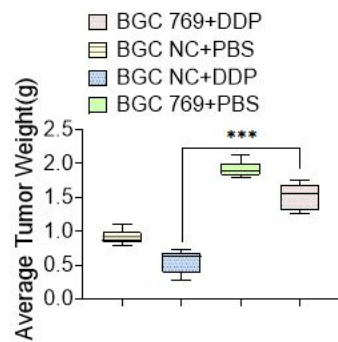**I**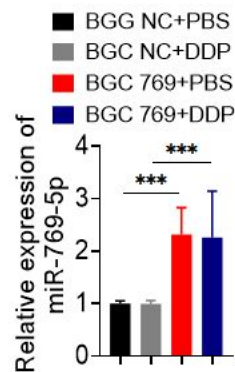**J**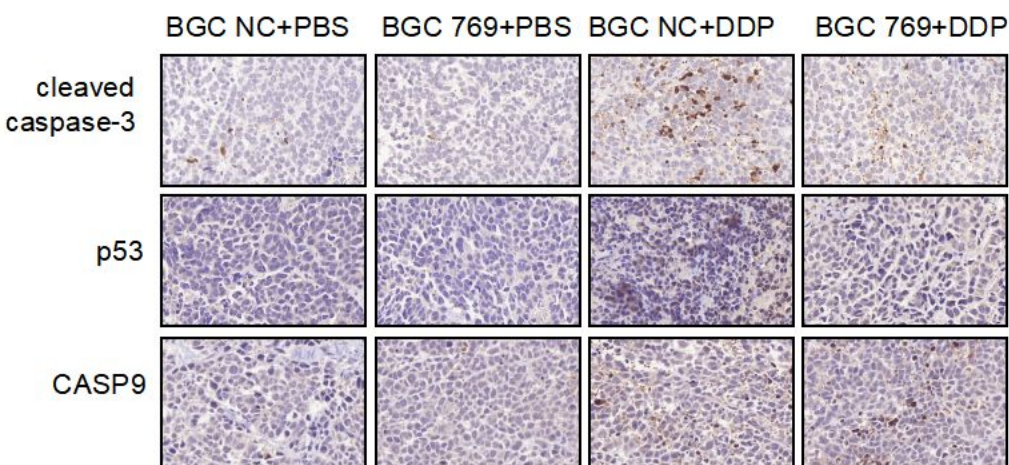



**A**

| miR_name           | up/down | fold_change | pvalue(t_test) |
|--------------------|---------|-------------|----------------|
| hsa-miR-769-5p     | up      | 4.77        | 4.45E-03       |
| hsa-miR-30a-5p_R+1 | up      | 1.89        | 7.70E-03       |
| hsa-miR-365b-3p    | down    | 0.05        | 3.87E-04       |
| hsa-miR-21-3p_R+1  | down    | 0.31        | 6.35E-04       |
| hsa-miR-193b-1-5p  | down    | 0.10        | 3.13E-03       |

**B**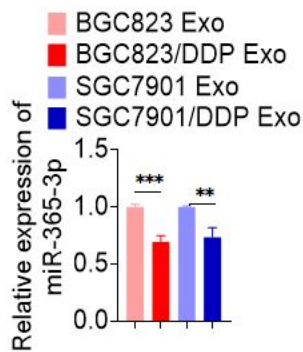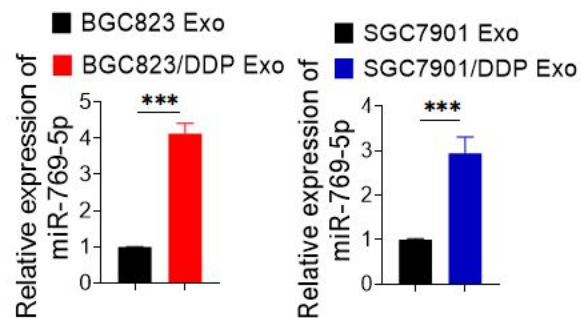**C**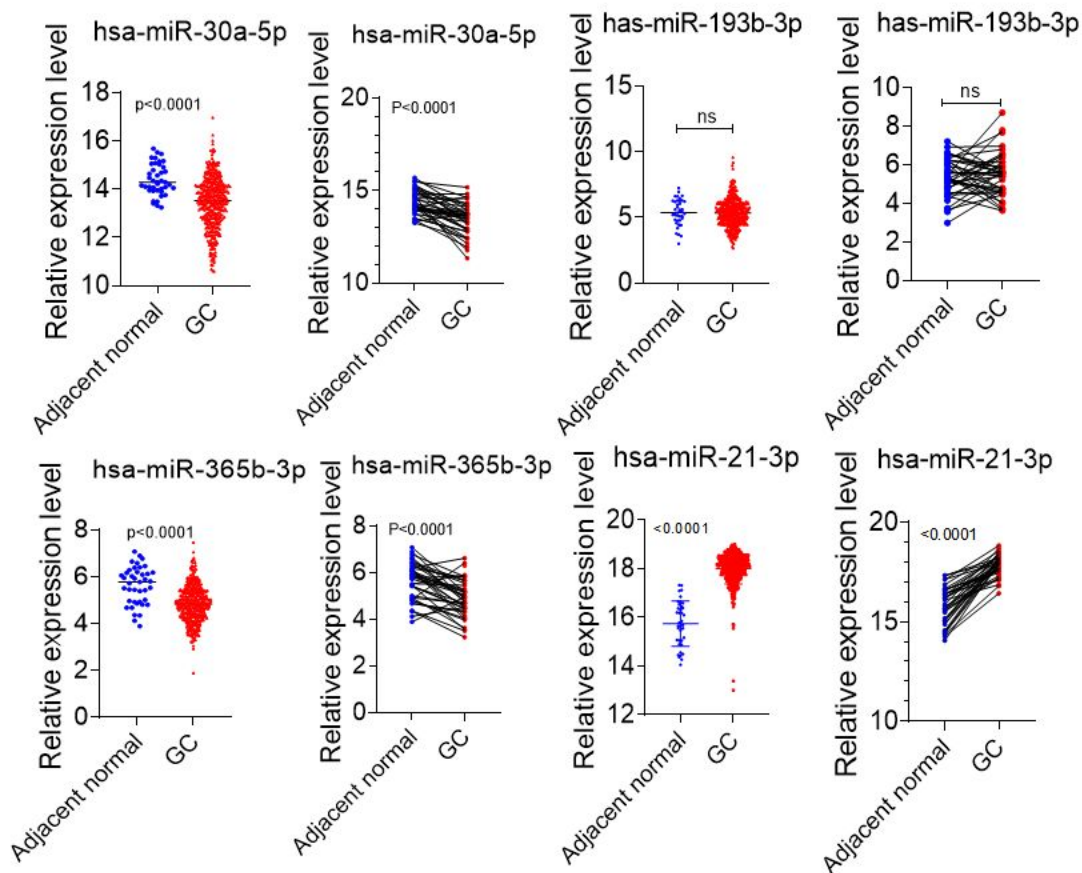**D**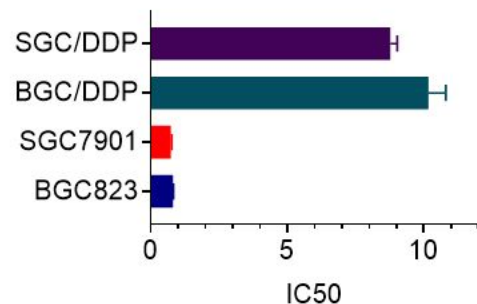**E**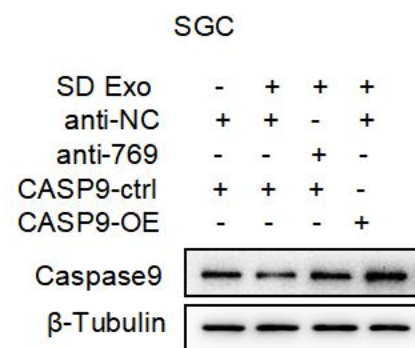**F**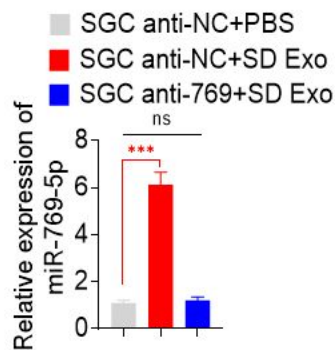**G**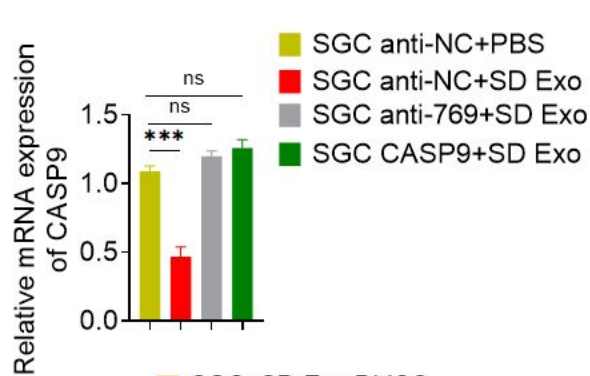**H**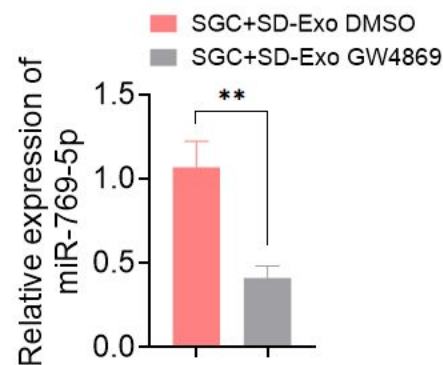**I**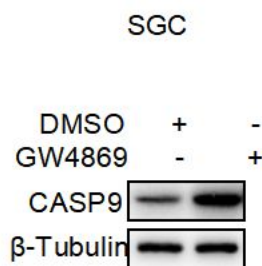**J**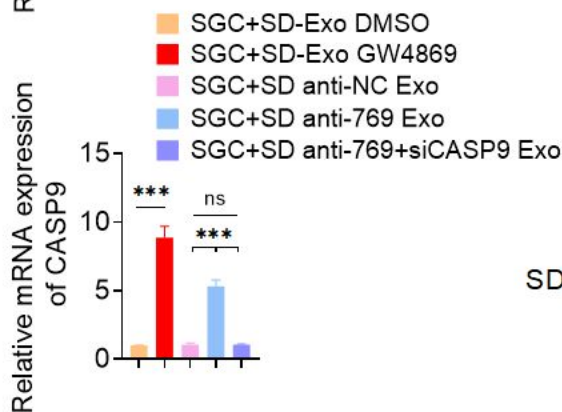**K**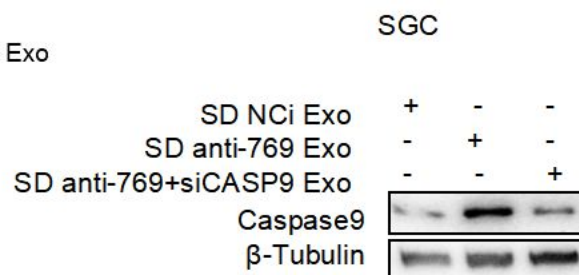

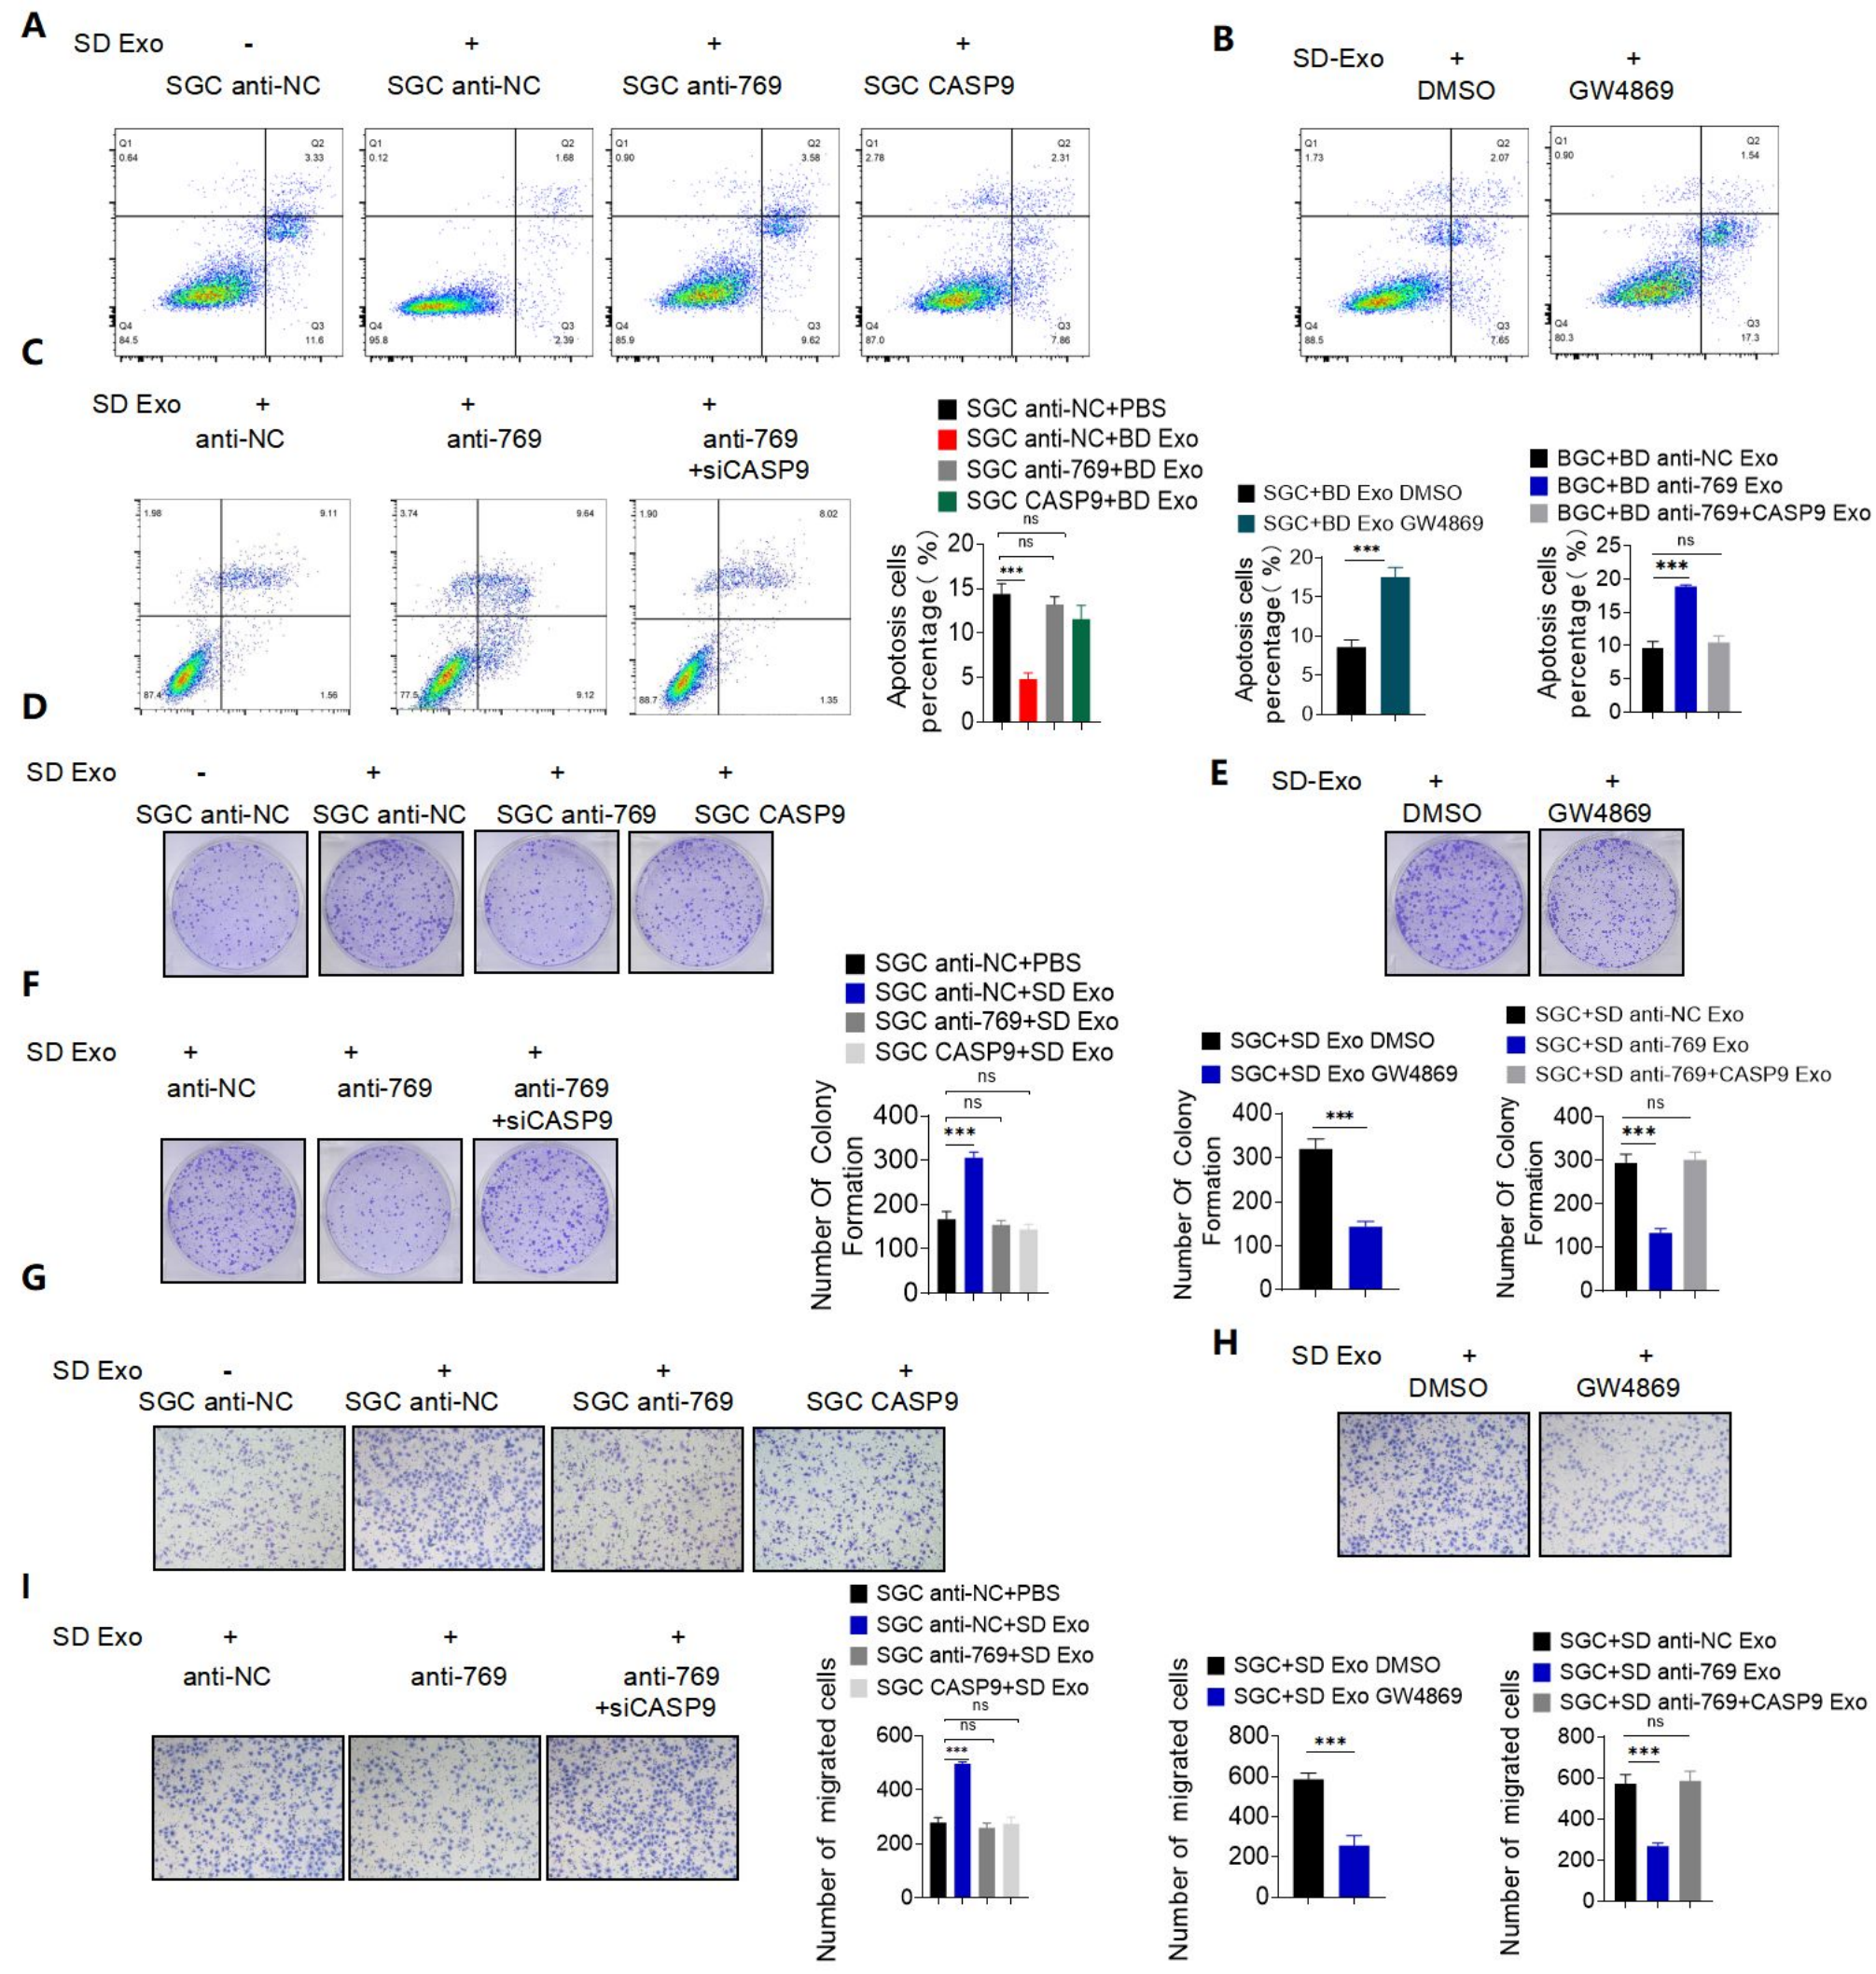

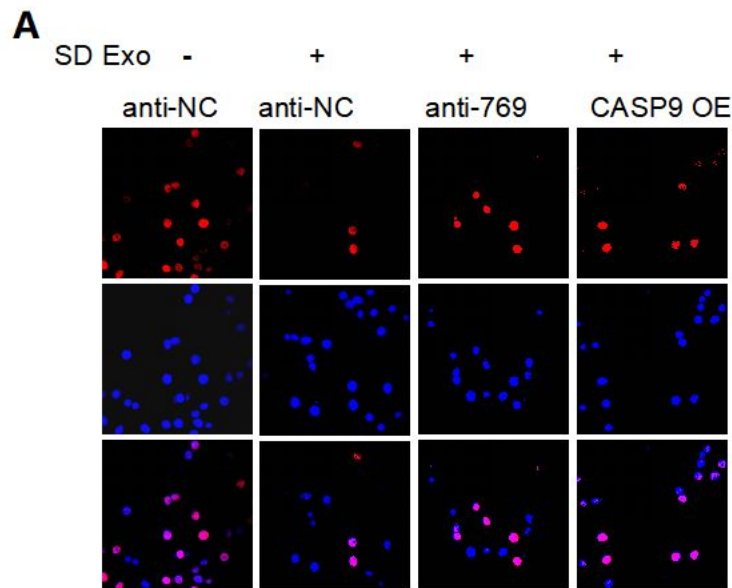

■ SGC anti-NC+PBS  
 ■ SGC anti-NC+BD Exo  
 ■ SGC anti-769+BD Exo  
 ■ SGC CASP9+BD Exo

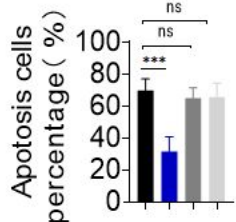

■ SGC+SD anti-NC Exo  
 ■ SGC+SD anti-769 Exo  
 ■ SGC+SD anti-769+CASP9 Exo

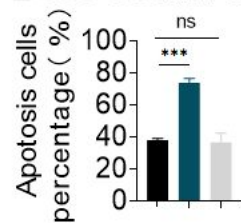

■ SGC+SD Exo DMSO  
 ■ SGC+SD Exo GW4869

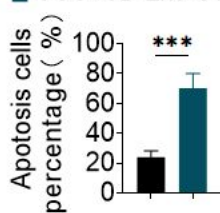

■ SGC anti-NC+PBS  
 ■ SGC anti-NC+SD Exo  
 ■ SGC anti-769+SD Exo  
 ■ SGC CASP9+SD Exo

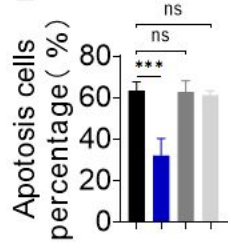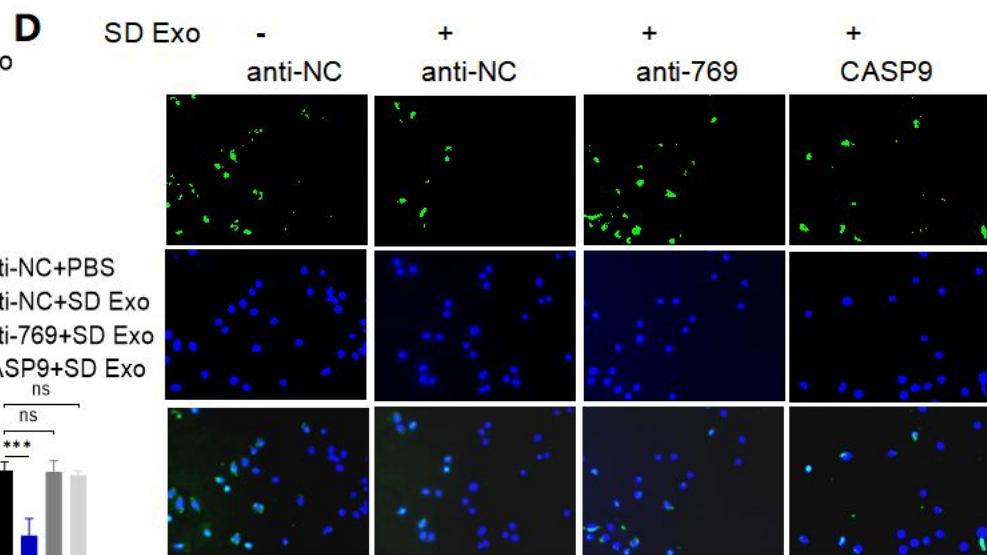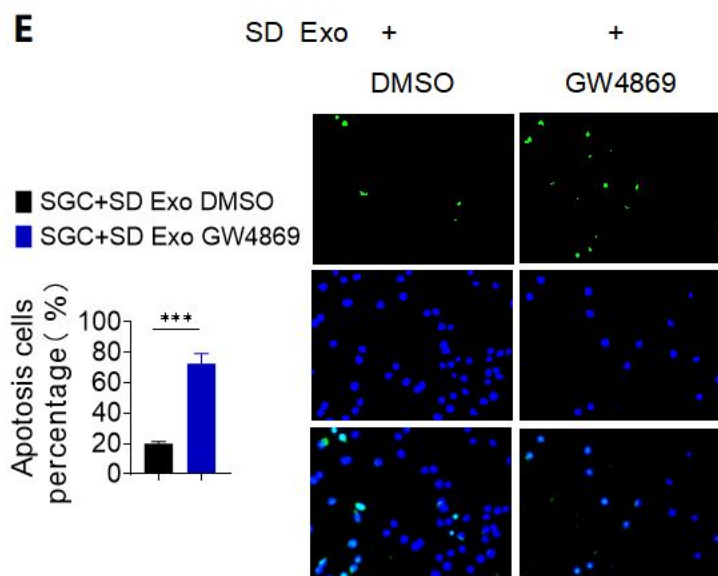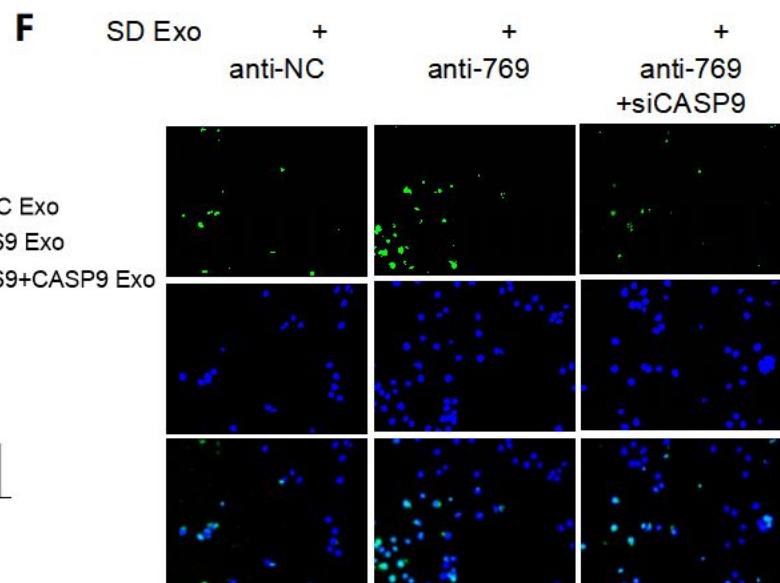

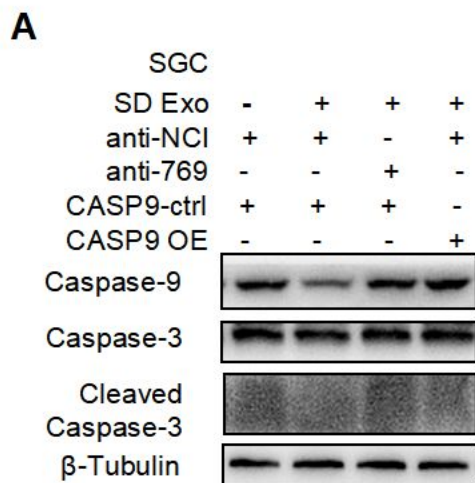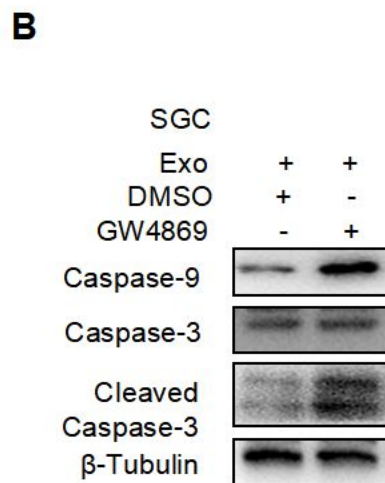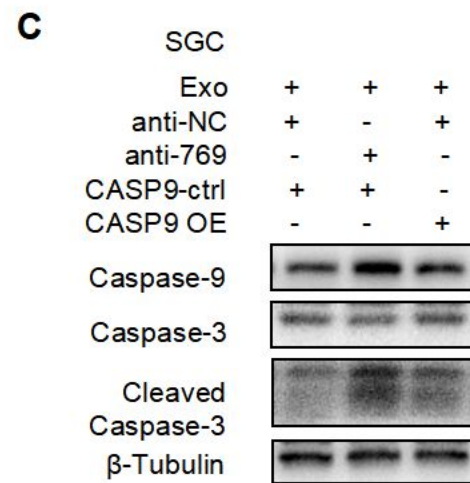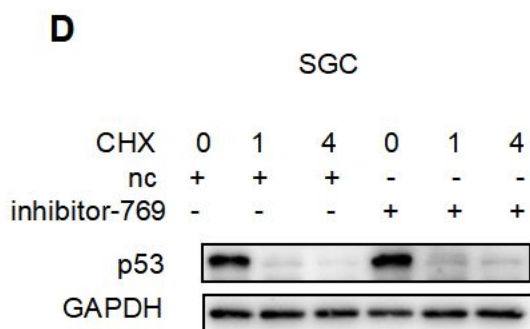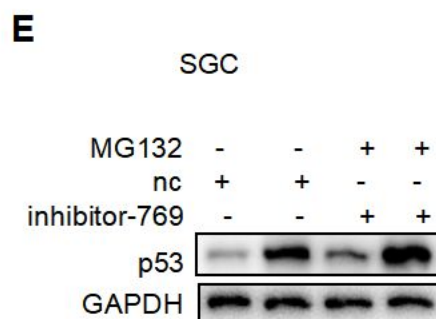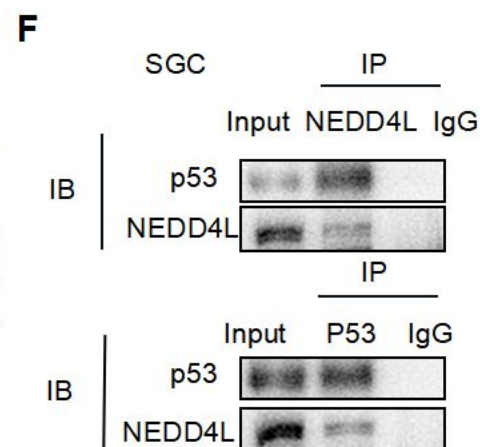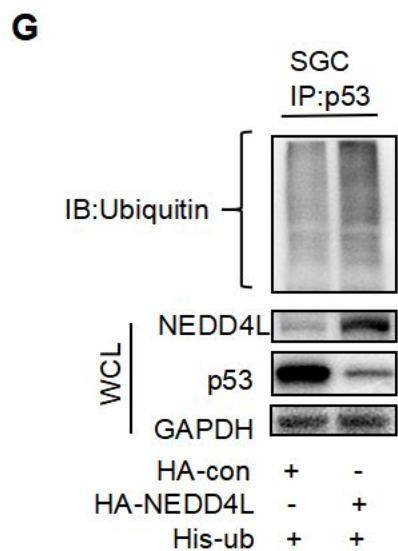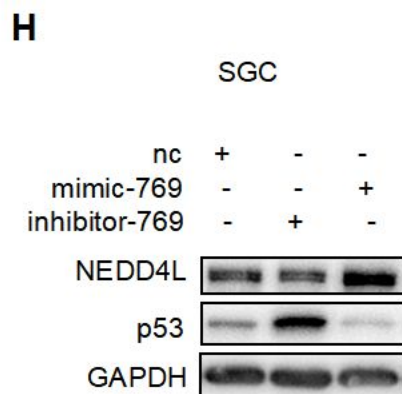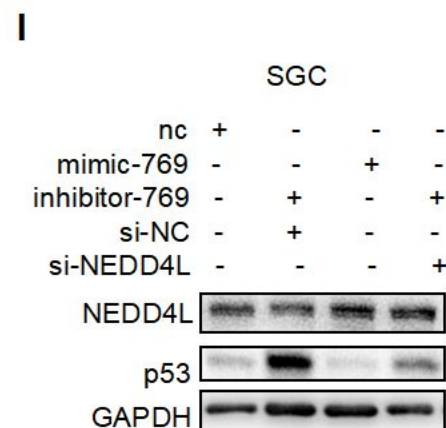

**A**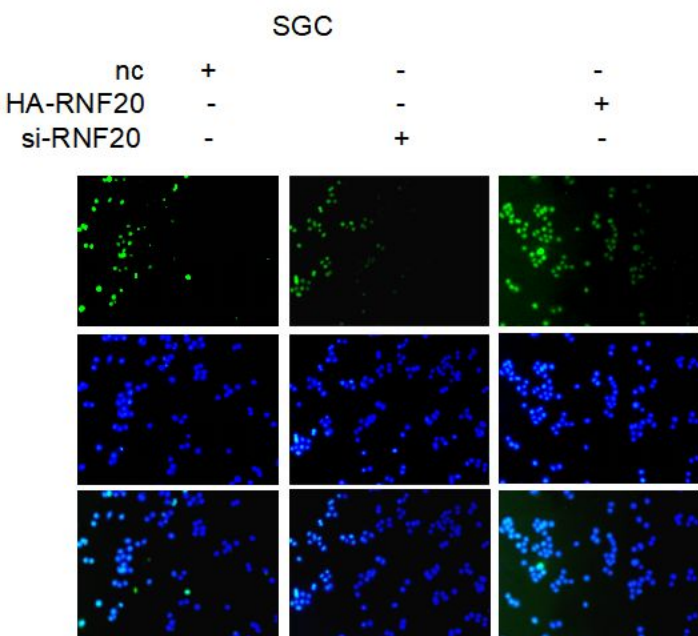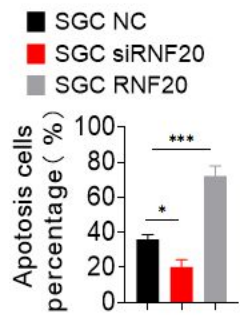**B**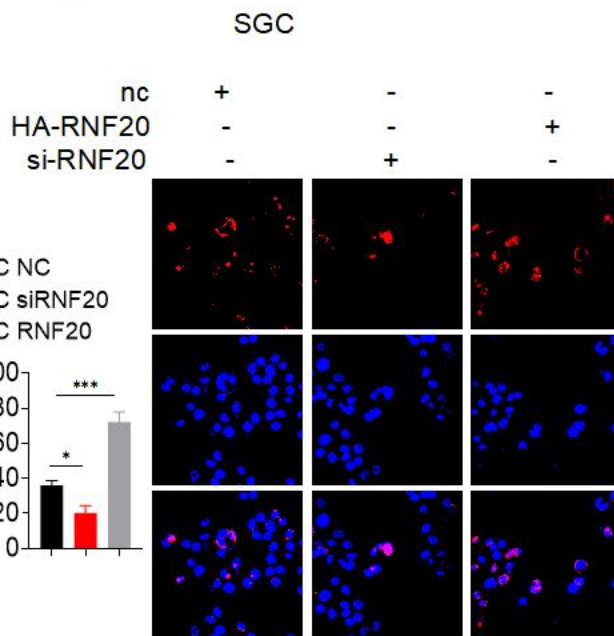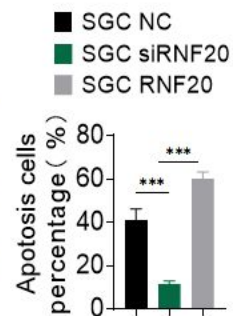**C**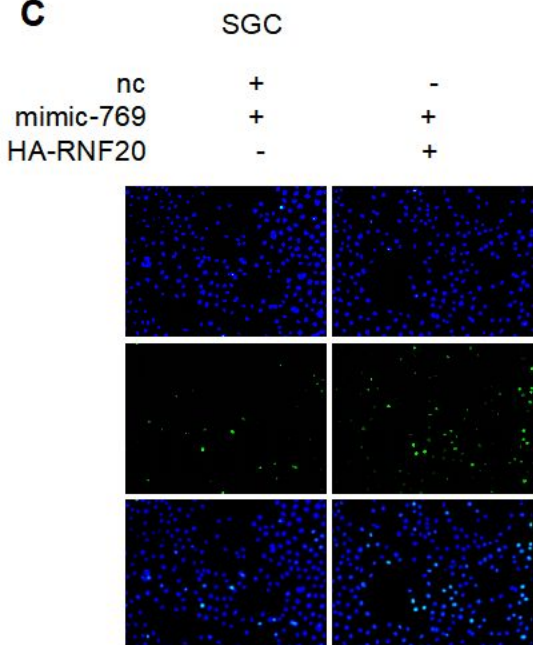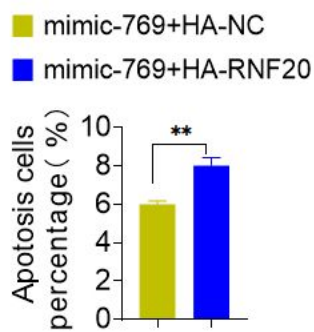**D**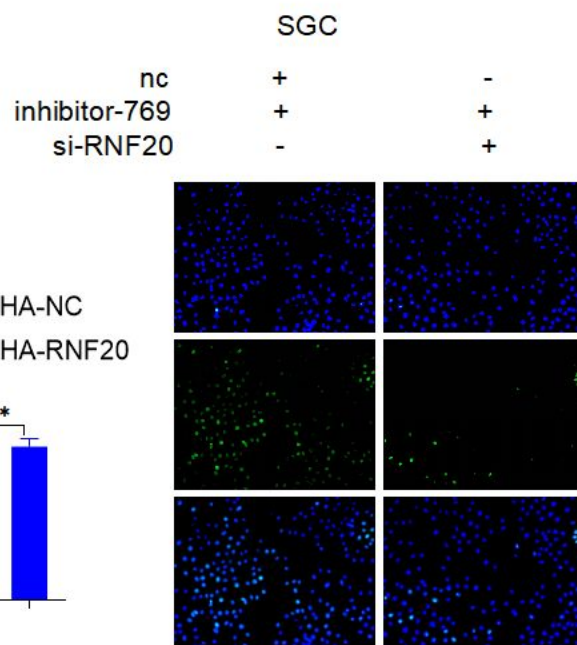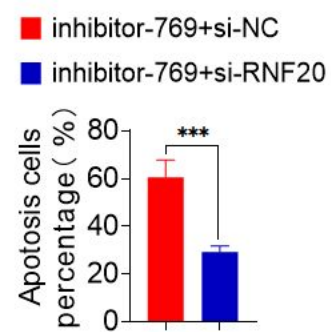

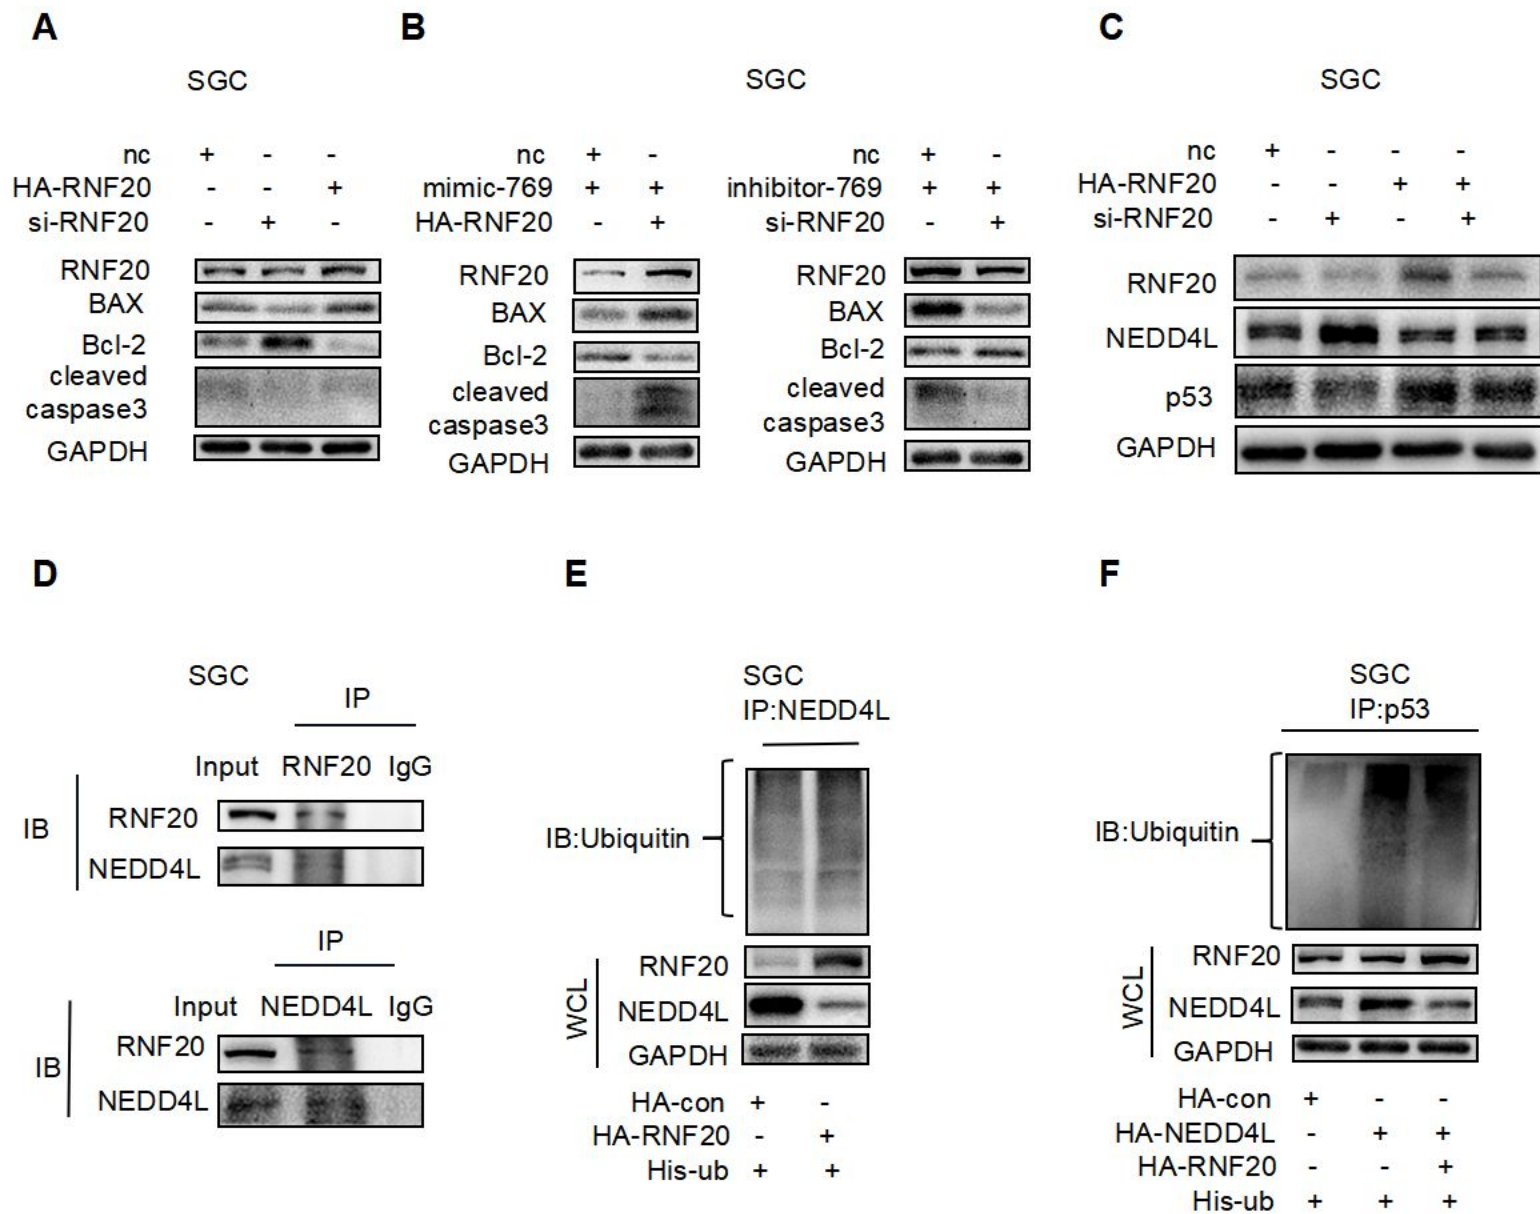

Source: https://www.biorxiv.org/content/biorxiv/early/2021/09/21/2021.09.19.461013.full.pdf
